# Supplementary material for: The InBIO Barcoding Initiative Database: DNA barcodes of Portuguese Diptera 01
Source: Biodivers Data J. 2020 Mar 20;8:e49985. doi: 10.3897/BDJ.8.e49985 (PMC7101446; doi:10.3897/BDJ.8.e49985)
Supplement: Supplementary material 4 — IBI- Diptera 01 library - DNA sequences [file bdj-08-e49985-s004.fas]

>IBIDP001-19|Calliphora vomitoria|COI-5P|MN868884
TACTTTATACTTTATTTTTGGAGCTTGATCAGGAATGATTGGAACTTCATTAAGAATTTTAATTCGAGCTGAACTAGGGCATCCTGGGGCATTAATTGGAGATGACCAAATTTATAATGTAATTGTTACAGCTCATGCTTTTATTATAATTTTTTTTATAGTAATACCAATTATAATTGGAGGGTTTGGAAATTGATTAGTTCCTTTAATATTAGGAGCCCCAGATATAGCATTCCCTCGAATAAATAATATAAGTTTCTGACTTTTACCTCCTGCATTAACTTTATTATTAGTAAGTAGTATAGTAGAAAACGGAGCTGGAACTGGATGAACTGTTTATCCACCTTTATCTTCTAATATTGCACATGGAGGAGCTTCTGTTGATTTAGCTATTTTTTCTTTACATTTAGCAGGAATTTCTTCAATTTTAGGAGCTGTAAATTTTATTACTACAGTTATTAATATACGATCAACAGGTATTACCTTCGACCGAATACCATTATTTGTTTGATCAGTAGTAATTACAGCCTTATTACTTTTATTATCTTTACCAGTATTAGCAGGAGCTATTACTATATTATTAACAGATCGAAATCTTAATACTTCATTCTTTGACCCAGCAGGAGGAGGAGATCCAATTTTATACCAACACTTATTT
>IBIDP003-19|Myennis octopunctata|COI-5P|MN868824
AACTTTATATTTTATCTTCGGAGCTTGAGCAGGAATAGTAGGAACCTCACTTAGAATTCTAATTCGAGCTGAACTAGGGCATCCTGGTGCATTAATCGGAGATGACCAAATTTATAATGTAATCGTAACCGCTCATGCATTCGTAATAATTTTCTTCATAGTAATACCAGTCATAATAGGAGGATTCGGAAATTGATTAGTCCCACTAATACTAGGGGCCCCTGATATGGCATTCCCACGAATAAATAATATAAGTTTTTGGTTACTACCCCCATCCTTAACCCTCTTATTAGTTAGTAGTATAGTAGAAAACGGAGCTGGAACTGGTTGAACTGTGTACCCCCCACTTTCATCAGTAATTGCTCACGGAGGAGCATCCGTTGATCTAGCTATTTTTTCACTACATCTAGCAGGAGTTTCCTCAATTCTAGGAGCAGTAAACTTCATTACTACAGTAATTAATATACGATCAACTGGAATTACATTTGACCGAATACCTCTTTTCGTTTGATCAGTAGTAATCACTGCCCTTCTCCTCCTTCTTTCCCTCCCTGTATTAGCCGGAGCTATTACTATACTTTTAACAGATCGAAACCTAAATACATCATTCTTTGACCCTGCCGGAGGAGGAGACCCAATTTTATACCAACATTTATTT
>IBIDP006-19|Anthomyia imbrida|COI-5P|MN868736
TACTTTATATTTTATTTTTGGAGCATGAGCAGGAATAGTAGGTACCTCTTTAAGTATCTTAATTCGAGCTGAATTAGGTCATCCTGGTGCTTTAATTGGAAATGATCAAATTTATAATGTTATTGTAACAGCCCATGCTTTTATTATAATTTTTTTTATAGTAATACCTATTATAATTGGAGGATTTGGAAATTGATTAGTTCCACTTATATTAGGAGCTCCTGATATAGCTTTCCCTCGAATAAATAATATAAGTTTCTGACTTTTACCTCCTGCATTAACTTTATTGTTAGTAAGTAGTATAGTAGAAAACGGAGCTGGAACAGGATGAACTGTTTACCCACCTCTATCTTCTAATATTGCTCATGGAGGAGCTTCTGTTGACTTAGCTATTTTTTCTCTTCATCTAGCAGGTATTTCCTCAATTTTAGGAGCTGTAAATTTTATTACAACAGTAATTAATATACGAGCCACAGGAATTACCTTTGATCGCATACCTTTATTTGTATGATCCGTAGTAATTACTGCATTATTATTATTACTTTCTTTACCAGTTTTAGCAGGTGCTATTACAATATTATTAACAGATCGAAATTTAAATACTTCATTTTTTGATCCTGCCGGAGGAGGAGATCCAATTTTATACCAACATTTATTC
>IBIDP011-19|Suillia variegata|COI-5P|MN868903
AACCCTTTATTTTATATTCGGGGCCTGAGCAGGTATGGTTGGAACTTCTTTAAGAATTTTAATTCGAACCGAACTCGGACACCCTGGCGCCTTAATTGGTGATGACCAAATTTATAATGTTATTGTTACAGCTCATGCTTTTGTAATAATTTTTTTCATAGTAATACCAATTATAATTGGAGGATTTGGAAATTGATTGGTCCCTTTAATATTAGGGGCCCCTGATATGGCCTTTCCCCGAATGAATAATATAAGTTTTTGGTTATTACCCCCTTCTTTAACTTTACTATTAGTAAGTAGTATAGTTGAAAATGGGGCGGGGACAGGTTGAACTGTTTACCCCCCACTCTCTTCAGGAATTGCACATGGAGGAGCATCTGTTGATTTAGCTATTTTTTCTCTTCACTTAGCTGGGATCTCTTCAATTTTAGGAGCAGTAAATTTTATTACTACTGTAATTAATATGCGATCAACAGGAATTACATTTGACCGAATACCTTTATTTGTTTGATCAGTAGTAATTACAGCTTTATTACTTCTTTTATCTTTACCTGTATTAGCAGGAGCTATTACTATATTATTAACAGATCGAAATTTAAATACCTCTTTTTTTGATCCAGCTGGAGGAGGAGACCCAATTTTATACCAACACTTATTT
>IBIDP013-19|Hybos culiciformis|COI-5P|MN868718
AACACTATATTTTATTTTCGGGGCATGATCAGGGATAGTAGGAACGTCTCTAAGAATTCTAGTACGAGCTGAATTAGGCCATCCAGGAGCATTAATTGGAGATGATCAAATTTATAATGTAATTGTAACAGCTCATGCTTTTGTAATAATTTTTTTTATAGTAATACCTATTATAATTGGAGGGTTTGGTAATTGATTAGTACCATTAATATTAGGAGCCCCTGATATAGCTTTCCCTCGAATAAATAACATAAGTTTTTGAATATTACCTCCCTCACTAACTCTTCTTTTAGCAAGTAGTATAGTAGAAAACGGGGCTGGAACAGGATGAACAGTTTACCCCCCACTATCTGCAGGAATCGCACATGGTGGGGCATCTGTTGATCTAGCAATTTTTTCTCTACATTTAGCAGGAATTTCCTCAATTTTAGGCGCAGTTAATTTTATTACTACAGTAATTAATATACGATCGCCTGGAATTTCATTTGATCGTATACCTCTATTTGTTTGATCAGTAGTTATTACAGCAATTCTTTTACTTTTATCGCTTCCTGTTTTAGCTGGAGCTATCACAATATTATTAACTGACCGAAATTTAAATACATCTTTCTTTGACCCCGCAGGAGGGGGAGACCCTATTTTATACCAACACTTATTT
>IBIDP014-19|Hybos culiciformis|COI-5P|MN868910
AACACTATATTTTATTTTCGGGGCATGATCAGGGATAGTAGGAACGTCTCTAAGAATTCTAGTACGAGCTGAATTAGGCCATCCAGGAGCATTAATTGGAGATGATCAAATTTATAATGTAATTGTAACAGCTCATGCTTTTGTAATAATTTTTTTTATAGTGATACCTATTATAATTGGAGGGTTTGGTAATTGATTAGTACCATTAATATTAGGAGCCCCTGATATAGCTTTCCCTCGAATAAATAACATAAGTTTTTGAATATTACCTCCCTCACTAACTCTTCTTTTAGCAAGTAGTATAGTAGAAAACGGAGCTGGAACAGGATGAACAGTTTACCCCCCACTATCTGCAGGAATCGCACATGGTGGGGCATCTGTTGATCTAGCAATTTTTTCTCTACATTTAGCAGGAATTTCCTCAATTTTAGGCGCAGTTAATTTTATTACTACAGTAATTAATATACGATCGCCTGGAATTTCATTTGATCGTATACCTCTATTTGTTTGATCAGTAGTTATTACAGCAATTCTTTTACTTTTATCGCTTCCTGTTTTAGCTGGAGCTATCACAATATTATTAACTGACCGAAATTTAAATACATCTTTCTTTGACCCCGCAGGAGGAGGAGACCCTATTTTATACCAACACTTATTT
>IBIDP015-19|Episyrphus balteatus|COI-5P|MN868781
AACCTTATATTTTCTATTCGGAGCTTGAGCTGGAATAGTAGGTACATCATTAAGTGTATTAATTCGTGCAGAACTTGGTCATCCTGGTGCTTTAATTGGAGATGATCAAATTTATAATGTAATTGTTACAGCCCATGCTTTTGTAATAATTTTTTTTATAGTAATACCTATTATAATTGGAGGATTTGGTAATTGATTAGTTCCATTAATATTAGGAGCTCCTGATATAGCATTTCCTCGTTTAAATAATATAAGTTTTTGACTATTACCTCCTTCTTTAACATTATTATTAGTAAGTAGTATAGTTGAAAATGGAGCTGGAACAGGTTGAACAGTATATCCTCCTCTTTCTGCTGGTATTGCTCATGGAGGAGCTTCTGTAGATTTAGCAATTTTTTCTTTACATTTAGCAGGAATATCATCAATTTTAGGAGCTGTAAATTTTATTACAACTGTTATTAATATACGATCTCATGGAATTACTTATGATCGAATACCTTTATTTGTTTGATCAGTTGTAATTACAGCATTATTATTACTTTTATCATTACCTGTATTAGCAGGAGCTATTACTATACTTTTAACTGATCGAAATTTAAATACTTCATTCTTTGATCCAGCAGGAGGAGGAGATCCAATTTTATATCAACATTTATTT
>IBIDP016-19|Eristalis similis|COI-5P|MN868813
AACATTATATTTTGTATTTGGTACATGAGCAGGTATAGTAGGAACTTCTTTAAGAATTTTAATTCGAGCTGAATTAGGACATCCTGGAGCATTAATTGGTGATGATCAAATTTATAATGTAATTGTAACAGCTCATGCTTTTGTAATAATTTTTTTTATAGTTATACCTATTATAATTGGAGGATTTGGAAATTGATTAGTTCCTCTTATACTTGGAGCTCCTGATATAGCATTTCCTCGAATAAATAATATAAGATTCTGGTTATTACCTCCTTCTTTAACTCTATTATTAGTAAGAAGTATAGTAGAAAATGGAGCTGGAACAGGATGAACAGTTTACCCACCTTTATCAAGAAATATTGCTCATGGTGGAGCCTCAGTAGACCTAGCAATTTTTTCATTACATTTATCTGGAATATCATCTATTTTAGGAGCAGTAAATTTTATTACTACTGTTATTAATATACGATCAACAGGAATTACTTATGATCGAATACCTTTATTTGTTTGATCCGTTGCTATTACAGCTTTATTATTATTACTTTCACTACCAGTACTAGCTGGTGCAATTACAATATTATTAACAGATCGAAATTTAAATACTTCATTTTTTGACCCAGCAGGAGGTGGAGATCCAATTTTATACCAACATTTATTT
>IBIDP018-19|Calliphora vicina|COI-5P|MN868761
TACTTTATACTTTATTTTTGGAGCTTGATCGGGAATAATTGGAACTTCACTAAGAATTCTAATTCGAGCCGAACTAGGACATCCTGGAGCATTAATTGGAGATGACCAAATTTATAATGTAATTGTTACAGCTCATGCTTTTATTATAATTTTTTTTATAGTAATACCAATTATAATTGGAGGATTTGGTAATTGATTAGTTCCTTTAATATTAGGAGCTCCAGATATAGCCTTCCCTCGGATAAACAATATAAGTTTCTGACTTTTACCTCCTGCATTAACTTTACTATTAGTAAGTAGTATAGTAGAAAACGGAGCTGGAACAGGATGAACTGTTTACCCACCTTTATCTTCTAATATCGCTCATGGAGGAGCTTCTGTTGATTTAGCTATTTTTTCTTTACACTTAGCAGGAATTTCTTCAATTTTAGGAGCTGTAAATTTTATTACTACAGTTATTAATATACGATCAACAGGAATTACATTCGACCGAATACCATTATTTGTTTGATCTGTAGTAATTACAGCTTTATTACTTTTATTATCTTTACCAGTATTAGCAGGTGCTATTACTATATTATTAACAGATCGAAATCTTAATACATCATTCTTTGACCCAGCAGGAGGAGGAGACCCAATCTTGTACCAACATTTATTT
>IBIDP023-19|Scathophaga stercoraria|COI-5P|MN868821
AACATTATACTTTATTTTTGGAGCATGATCCGGAATAATTGGAACTTCTTTAAGTATTCTAATTCGAGCTGAATTAGGACATCCTGGAGCATTAATTGGAGATGACCAAATCTATAATGTAATTGTAACAGCTCATGCTTTTATTATAATTTTTTTTATAGTAATACCAATTATAATTGGAGGATTTGGAAATTGATTAGTGCCTCTTATATTAGGTGCTCCTGATATAGCTTTCCCTCGAATAAATAATATAAGTTTTTGACTTTTACCACCAGCATTAACTTTATTGTTAGTAAGTAGTATAGTAGAAAACGGAGCTGGAACAGGATGAACTGTTTACCCTCCTTTATCTTCAAATATTGCTCATGGAGGAGCTTCTGTTGATTTAGCAATTTTTTCTCTTCATTTAGCAGGAATTTCATCTATTTTAGGAGCTGTAAATTTTATTACAACTGTAATTAATATACGATCAACAGGAATTACTTTTGATCGAATACCTTTATTTGTATGATCTGTAGTAATTACAGCTTTATTACTTTTATTATCTTTACCTGTTTTAGCTGGAGCTATTACTATACTATTAACAGATCGAAATCTTAATACATCATTTTTTGATCCAGCAGGAGGAGGAGACCCAATTCTATATCAACATTTATTT
>IBIDP028-19|Ulidia apicalis|COI-5P|MN868774
AACTTTATATTTCATCTTCGGAGCTTGAGCAGGAATAGTAGGAACCTCTCTTAGAATTTTAATCCGAGCAGAACTAGGCCACCCTGGAGCCCTAATTGGAGATGACCAAATTTATAACGTAATCGTTACAGCACACGCATTTGTAATAATTTTTTTCATAGTTATACCAATTATAATTGGTGGATTCGGTAATTGACTTGTTCCCTTGATACTTGGAGCCCCAGACATAGCTTTCCCTCGGATAAATAATATAAGTTTCTGACTTCTTCCTCCTTCTTTAACCCTCCTGTTAGTAAGTAGTATAGTAGAAAACGGAGCAGGTACAGGATGAACCGTGTACCCTCCGTTATCATCAGTAATTGCTCATGGAGGAGCTTCCGTTGATTTAGCTATCTTCTCCTTACACTTAGCCGGAGTTTCATCAATTTTAGGAGCAGTAAATTTCATCACTACAGTGATTAATATACGATCAACAGGGATTACATTTGATCGTATACCTTTATTCGTTTGATCTGTTGTAATTACTGCTCTACTCTTACTACTTTCCCTACCAGTTCTAGCTGGAGCTATTACTATATTATTAACTGACCGAAACTTAAATACATCCTTTTTTGACCCTGCCGGAGGAGGGGACCCTATTTTGTACCAACACCTATTT
>IBIDP034-19|Sylvicola cinctus|COI-5P|MN868804
AACTTTATATTTTATTTTTGGTGCCTGAGCTAGAATAGTGGGAACTTCATTAAGAATATTAATTCGTGCTGAATTAGGTCATCCCGGCGCTTTAATTGGAGATGATCAAATTTATAATGTTATTGTAACTGCTCATGCTTTTGTAATAATTTTTTTTATAGTAATACCTATTATAATTGGAGGATTTGGAAATTGATTAGTTCCTCTTATATTAGGGGCTCCTGATATAGCATTTCCTCGAATAAATAATATAAGATTTTGAATATTACCCCCCTCTTTAACTCTTTTATTAGCCAGATCTATAGTAGAAAATGGGGCGGGAACTGGTTGAACAGTATACCCCCCTCTTTCCTCCGGCATTGCTCATGCCGGCGCTTCCGTTGATTTAGCAATTTTTTCTCTTCATCTTGCAGGAATTTCTTCTATTTTAGGCGCAGTAAATTTTATTACAACAGTAATTAATATACGATCTTCAGGAATTACTTTTGATCGAATACCTTTATTTGTCTGATCAGTAGTAATTACAGCAATCCTTCTCCTTCTTTCTTTACCTGTTTTAGCTGGAGCTATTACTATATTATTAACAGACCGAAATTTAAATACTTCCTTTTTTGACCCCGCTGGAGGGGGAGACCCAATTCTATACCAACATTTATTC
>IBIDP035-19|Eloceria delecta|COI-5P|MN868889
TACTTTATATTTTATTTTTGGGGCCTGAGCAGGAATAATTGGAACTTCCTTAAGAATCTTAATTCGAACAGAATTAGGACACCCAGGAGCCCTAATTGGAGATGATCAGATTTACAATGTAATTGTAACAGCACATGCTTTTATTATAATTTTTTTTATGGTCATACCAATTATAATTGGAGGATTTGGAAATTGACTAGTTCCATTAATACTAGGAGCCCCAGATATAGCTTTCCCTCGAATAAATAATATAAGATTTTGATTATTACCTCCAGCACTAACTTTACTACTAATTGGTAGTATAGTAGAAAATGGAGCTGGGACAGGATGAACAGTTTATCCTCCCCTATCATCCAATATTGCCCATAGAGGTTCTTCTGTTGATTTAACAATTTTTTCATTACATTTAGCAGGTATTTCTTCTATTTTAGGGGCAGTAAATTTTATCACTACAGTAATTAATATACGATCAACAGGTATTTCCTTTGATCGAATACCTCTATTTGTTTGATCTGTTGTTATTACAGCTTTACTTCTACTTTTATCCTTACCAGTACTAGCTGGAGCTATTACAATACTATTAACAGATCGAAATTTAAACACTTCATTTTTTGACCCAGCCGGAGGAGGAGACCCTATCCTATACCAACACTTATTT
>IBIDP036-19|Phortica variegata|COI-5P|MN868784
AACTTTATATTTTATTTTCGGAGCTTGAGCTGGAATAGTTGGAACTTCATTAAGAATTTTAATTCGAGCTGAATTAGGACACCCTGGTGCATTAATTGGAGACGATCAAATTTATAATGTAATTGTTACAGCTCATGCTTTTATTATAATTTTTTTTATAGTTATACCTGTTATAATTGGAGGATTTGGAAACTGATTAGTTCCTCTTATATTAGGAGCCCCTGATATAGCTTTCCCTCGAATAAACAATATAAGTTTTTGACTTTTGCCACCAGCTTTATCCCTTTTATTGGTAAGTAGTATAGTTGAAAACGGAGCTGGAACTGGGTGAACTGTTTACCCTCCTTTATCTTCTGGAATTGCCCATGGAGGAGCTTCAGTAGATTTAGCAATTTTTTCTCTTCATTTAGCTGGAATTTCATCAATTTTAGGAGCCGTAAATTTTATTACTACAGTAATTAATATACGAGCTTCAGGTATTACTTTAGATCGAATGCCTTTATTTGTATGATCAGTTGTAATTACTGCATTTTTACTTCTTTTATCTCTTCCTGTTTTAGCTGGAGCTATTACTATGTTATTAACAGATCGAAATTTAAATACATCTTTTTTTGACCCAGCAGGAGGGGGAGATCCGATTCTTTACCAACACTTATTT
>IBIDP040-19|Eristalinus taeniops|COI-5P|MN868817
TACATTATATTTTGTATTTGGAACATGAGCAGGAATAGTAGGTACTTCTTTAAGAGTATTAATTCGAGCTGAATTAGGTCATCCAGGTGCCTTAATTGGAGATGATCAAATTTATAATGTTATTGTTACAGCTCATGCATTTGTAATAATTTTTTTTATAGTTATACCTATTATAATTGGAGGATTTGGAAATTGATTAGTTCCTTTAATATTAGGAGCTCCTGATATAGCATTTCCTCGAATAAATAACATAAGTTTTTGATTATTACCACCTTCTTTAACTTTATTATTAGTAAGAAGTATAGTAGAAAATGGAGCTGGAACTGGATGAACAGTTTACCCTCCTTTATCAAGTAACATTGCCCACGGAGGAGCCTCAGTTGACTTAGCAATTTTTTCTTTACATCTATCTGGTATATCATCAATTTTAGGTGCAGTAAATTTTATTACAACTGTAATTAATATACGTTCAACAGGTATTACATATGATCGAATACCTTTATTCGTTTGATCAGTTGCTATTACAGCTCTTTTACTTTTATTATCACTTCCTGTACTAGCCGGAGCTATTACTATATTATTAACAGATCGAAATTTAAATACTTCTTTTTTTGACCCAGCTGGAGGAGGAGACCCAATTTTATATCAACATTTATTT
>IBIDP042-19|Helophilus pendulus|COI-5P|MN868838
TACATTATATTTCGTATTTGGAACATGAGCTGGAATAGTAGGGACTTCATTAAGTATACTAATTCGAGCAGAATTAGGACATCCTGGAGCCTTAATTGGAGATGACCAAATTTATAATGTTATTGTTACAGCTCATGCTTTTGTAATAATTTTCTTTATAGTAATACCTATTATAATTGGAGGATTTGGAAATTGACTAGTTCCATTAATATTAGGAGCTCCTGATATAGCTTTTCCTCGAATAAATAATATAAGTTTTTGACTTTTACCTCCTTCTTTAACTTTACTATTAGTAAGTAGTATAGTAGAAAACGGAGCTGGAACAGGATGAACAGTTTATCCTCCACTTTCAAGAAATATTGCACACGGAGGAGCATCAGTTGATTTAGCAATTTTCTCTCTTCATTTAACAGGTATATCCTCAATTTTAGGAGCAGTAAATTTTATTACAACTGTAATTAATATACGATCTACAGGTATTACCTATGATCGAATACCTTTATTTGTATGATCTGTAGCAATTACAGCTCTTTTACTTCTACTTTCATTACCAGTTTTAGCAGGAGCTATTACTATATTATTAACTGATCGAAATTTAAATACTTCATTCTTTGACCCAGCAGGAGGAGGAGATCCAATTTTATATCAACATTTATTT
>IBIDP043-19|Eristalis similis|COI-5P|MN868812
AACATTATATTTTGTATTTGGTACATGAGCAGGTATAGTAGGAACTTCTTTAAGAATTTTAATTCGAGCTGAATTAGGACATCCTGGAGCATTAATTGGTGATGATCAAATTTATAATGTAATTGTAACAGCTCATGCTTTTGTAATAATTTTTTTTATAGTTATACCTATTATAATTGGAGGATTTGGAAATTGATTAGTTCCTCTTATACTTGGAGCTCCTGATATAGCATTTCCTCGAATAAATAATATAAGATTCTGGTTATTACCTCCTTCTTTAACTCTATTATTAGTAAGAAGTATAGTAGAAAATGGAGCTGGAACAGGATGAACAGTTTACCCACCTTTATCAAGAAATATTGCTCATGGTGGAGCCTCAGTAGACCTAGCAATTTTTTCATTACATTTATCTGGAATATCATCTATTTTAGGAGCAGTAAATTTTATTACTACTGTTATTAATATACGATCAACAGGAATTACTTATGATCGAATACCTTTATTTGTTTGATCCGTTGCTATTACAGCTTTATTATTATTACTTTCACTACCAGTACTAGCTGGTGCAATTACAATATTATTAACAGATCGAAATTTAAATACTTCATTTTTTGACCCAGCAGGAGGTGGAGATCCAATTTTATATCAACATTTATTT
>IBIDP044-19|Eristalis tenax|COI-5P|MN868779
TACCTTATATTTTGTATTTGGAACATGAGCAGGTATAGTAGGAACTTCCTTAAGAATTTTAATTCGAGCTGAATTAGGCCATCCTGGAGCATTAATTGGAGATGATCAAATTTATAATGTTATTGTAACAGCTCATGCCTTTGTAATAATTTTCTTTATAGTAATACCTATTATAATTGGAGGATTTGGAAATTGATTAGTTCCTCTTATATTAGGAGCCCCCGATATAGCATTTCCTCGAATAAATAATATAAGTTTCTGATTATTACCTCCTTCTTTAACATTATTATTAGTAAGAAGTATAGTAGAAAATGGAGCTGGAACAGGATGAACTGTATACCCACCTTTATCAAGTAACATTGCACACGGAGGAGCCTCAGTTGATTTAGCAATTTTTTCACTTCATTTATCTGGTATATCATCTATTTTAGGTGCAGTAAATTTCATTACAACTATTATTAATATACGATCAACAGGAATTACATATGATCGAATACCTTTATTTGTATGATCTGTAGGTATTACAGCTTTACTACTACTTCTTTCCCTACCAGTTTTAGCAGGAGCAATTACTATATTATTAACTGATCGAAATTTAAATACATCATTTTTTGATCCAGCAGGAGGAGGTGATCCAATTTTATACCAACATTTATTT
>IBIDP045-19|Eristalis arbustorum|COI-5P|MN868719
AACATTATATTTTGTATTTGGAACATGAGCAGGAATAGTAGGAACCTCATTAAGAATTTTAATTCGAGCTGAATTAGGACATCCTGGAGCATTAATTGGTGATGATCAAATTTATAATGTTATTGTAACAGCTCATGCTTTCGTAATAATTTTCTTTATAGTTATACCTATTATAATTGGAGGATTTGGAAATTGATTAGTTCCTCTTATATTAGGTGCTCCTGATATAGCATTTCCTCGTATAAATAATATAAGTTTCTGATTACTACCTCCTTCTTTAACTCTATTATTAGTAAGAAGTATAGTAGAAAATGGAGCTGGAACAGGATGAACAGTTTATCCACCTTTATCAAGAAATATTGCTCATGGTGGAGCTTCAGTTGATTTAGCTATTTTTTCTTTACATTTATCAGGTATGTCTTCTATTTTAGGAGCAGTAAATTTCATTACAACAGTTATTAATATACGATCTACAGGAATTACATATGATCGAATACCTTTATTTGTATGATCAGTTGCTATTACAGCTTTATTACTTCTTTTATCACTTCCAGTTCTAGCTGGAGCAATTACAATATTATTAACTGATCGAAATTTAAATACCTCTTTTTTTGATCCAGCAGGAGGAGGAGATCCAATTTTATACCAACATTTATTT
>IBIDP046-19|Graphomya maculata|COI-5P|MN868765
AACCCTATATTTTATTTTTGGAGCTTGATCAGGAATAATTGGAACTTCTTTAAGAATTCTAATTCGAGCTGAACTAGGACATCCCGGTGCTTTAATTGGAGATGATCAAATTTATAATGTAATTGTTACAGCACACGCTTTTATTATAATTTTCTTTATAGTAATACCCATTATAATTGGAGGATTTGGAAACTGACTAGTACCTTTAATGCTTGGAGCTCCAGATATAGCTTTCCCACGAATAAATAATATGAGTTTTTGACTCCTTCCTCCTGCATTAACTCTTTTATTAGTCAGTAGAATAGTCGAAAACGGAGCTGGAACTGGTTGAACTGTTTACCCTCCTTTATCTGCTAATATCGCTCATGGAGGAGCTTCTGTTGATTTAGCTATTTTTTCTCTTCATTTAGCTGGAATTTCATCAATTTTAGGAGCTGTAAACTTTATTACAACTGTTATTAACATACGATCTACAGGAATTACATTTGACCGTATACCTTTATTTGTTTGATCTGTAGCTATTACTGCACTTTTACTTTTACTTTCACTTCCTGTTTTAGCTGGTGCAATCACTATACTCCTTACAGATCGGAATTTAAATACTTCATTTTTCGACCCAGCAGGAGGAGGAGACCCAATCTTATACCAACATTTATTT
>IBIDP048-19|Neomyia cornicina|COI-5P|MN868909
AACATTATATTTTATTTTTGGAGCATGATCTGGAATAATTGGAACTTCCCTAAGAATTTTAATTCGTGCTGAATTAGGACATCCAGGAGCATTAATTGGTGACGACCAAATTTATAATGTAATTGTTACAGCTCATGCATTTATCATAATTTTTTTTATAGTAATACCTATTATAATTGGAGGATTTGGAAATTGATTAGTACCTTTAATACTAGGAGCCCCTGATATAGCTTTCCCTCGAATAAATAATATAAGTTTTTGACTTCTTCCCCCTGCTTTAACATTATTATTAGTGAGTAGAATAGTAGAAAAGGGAGCTGGTACTGGTTGAACTGTTTACCCCCCTTTATCATCTAATATTGCTCATGGAGGAGCATCAGTAGATTTAGCAATTTTTTCATTACATTTAGCTGGAATTTCTTCAATTCTAGGAGCAGTAAATTTTATTACTACTGTAATTAATATACGATCAACTGGAATTACATTTGATCGAATACCTTTATTTGTATGATCTGTAGTAATTACAGCTTTATTATTACTTTTATCCCTTCCTGTATTAGCAGGAGCAATTACTATATTATTAACAGATCGAAATATAAATACTTCATTTTTTGATCCCGCAGGAGGAGGTGACCCAATTTTATACCAACATCTATTT
>IBIDP052-19|Coenosia tigrina|COI-5P|MN868808
AACTTTATATTTTATTTTTGGAGCTTGATCTGGAATAGTAGGTACATCTTTAAGAATTTTAATTCGAGCTGAATTAGGTCATCCAGGAGCATTAATTGGTGATGATCAAATTTATAATGTAATTGTTACTGCTCATGCATTTATTATAATTTTTTTTATGGTAATACCAATTATAATTGGAGGATTCGGAAATTGATTAGTTCCTTTAATACTGGGAGCTCCAGATATGGCTTTTCCTCGAATAAACAATATAAGTTTTTGACTTTTACCCCCAGCTTTAACTCTACTCCTTATAAGAAGTATAGTAGAAAATGGAGCTGGAACAGGTTGAACTGTATACCCTCCTCTATCTTCTAATATTGCTCATGGTGGGGCTTCTGTAGATTTAGCTATTTTTTCATTACATTTAGCAGGAATTTCCTCAATTTTAGGAGCCGTAAATTTTATTACTACAGTAATTAATATACGATCTACAGGAATTACTTTTGATCGAATACCTTTATTTGTATGATCTGTAGCAATTACAGCTTTATTATTACTATTATCTTTACCTGTTCTAGCAGGAGCTATTACAATATTATTGACAGATCGAAATTTAAATACTTCTTTTTTTGACCCTGCAGGAGGAGGAGATCCCATTCTATACCAACACTTATTC
>IBIDP053-19|Stomorhina lunata|COI-5P|MN868811
TACTTTATATTTCATTTTTGGAGCATGATCTGGTATAATTGGAACATCTTTAAGAATTTTAATTCGAGCCGAATTAGGTCATCCTGGAGCTTTAATTGGAGATGATCAAATTTATAATGTAATTGTTACAGCTCATGCTTTTGTAATAATTTTTTTTATAGTAATACCAATTATAATTGGAGGATTTGGAAATTGATTAGTTCCTTTAATATTAGGAGCACCAGATATAGCATTCCCTCGAATAAATAATATAAGTTTTTGACTTTTACCTCCTGCATTAACTTTATTATTAGTCAGTAGTATAGTAGAAAATGGAGCTGGGACAGGATGAACTGTTTACCCACCCTTATCTTCTAATATCGCTCATGGAGGAGCTTCAGTTGATTTAGCTATTTTCTCATTACATTTAGCAGGAATTTCTTCTATTTTAGGAGCTGTAAATTTTATTACGACTGTAATTAATATACGATCAACTGGAATTACTTTTGATCGTATACCTTTATTTGTTTGATCTGTAGTAATTACAGCTTTATTACTTTTATTATCTTTACCTGTATTAGCCGGAGCTATTACTATATTATTAACAGATCGAAATTTAAATACTTCTTTCTTTGATCCAGCAGGAGGAGGAGACCCAATTTTATACCAACATTTATTT
>IBIDP059-19|Muscina levida|COI-5P|MN868816
TACTTTATACTTTATTTTTGGAGCCTGATCAGGAATAGTAGGAACTTCCCTAAGTATCCTAGTACGTGCTGAATTAGGACACCCTGGTGCTTTAATTGGAGATGATCAAATTTATAACGTAATTGTAACAGCTCATGCATTTATTATAATTTTTTTTATAGTTATACCAATTATAATTGGAGGATTTGGTAATTGATTAGTTCCTTTAATACTAGGAGCCCCAGATATAGCCTTTCCTCGAATAAATAATATAAGTTTTTGACTTCTACCTCCTGCACTAACTCTACTTCTAGTAAGTAGTATAGTTGAAAGGGGAGCTGGTACTGGCTGAACTGTTTACCCTCCCTTATCTTCTAATATTGCTCATAGAGGAGCTTCAGTAGATTTAGCAATTTTTTCTTTACATTTAGCTGGAATTTCATCTATTTTAGGAGCCGTGAATTTCATTACAACTGTAATTAATATACGTTCTACAGGTATTACATTTGATCGAATACCTTTATTTGTTTGATCAGTAGTAATTACAGCTTTACTTCTTCTTTTATCTTTACCAGTATTAGCTGGAGCAATTACTATATTATTAACAGATCGAAATTTAAATACTTCATTTTTTGATCCTGCTGGAGGAGGAGATCCGATTCTATACCAACATTTATTT
>IBIDP060-19|Muscina pascuorum|COI-5P|MN868768
AACTTTATATTTCATTTTTGGAGCTTGATCAGGAATAGTAGGTACCTCCTTAAGTATCCTAGTACGTGCTGAATTAGGACACCCTGGAGCTTTAATTGGAGATGACCAGATTTATAATGTAATTGTAACAGCCCATGCATTTATTATAATTTTTTTTATAGTAATACCAATTATAATTGGAGGATTTGGTAATTGACTAGTACCCCTAATACTAGGAGCACCAGATATAGCCTTCCCTCGAATAAATAATATAAGATTTTGACTATTACCTCCTGCATTAACACTTTTATTGGTAAGTAGTATAGTGGAAAAGGGAGCTGGAACAGGATGAACCGTTTACCCTCCACTATCTTCTAACATTGCTCATAGAGGAGCTTCAGTTGATTTAGCAATTTTTTCTCTTCATTTAGCAGGAATTTCCTCTATTTTAGGAGCTGTAAATTTCATTTCAACTGTAATTAATATACGAGCAACAGGAATTACACTTGATCGAATACCTTTATTTGTTTGATCAGTAATAATTACAGCAATTCTATTACTTTTATCTTTACCAGTTTTAGCTGGAGCTATTACTATATTATTAACTGACCGTAATTTAAATACCTCTTTTTTTGACCCTTCTGGAGGAGGAGATCCAATCCTTTACCAACATTTATTT
>IBIDP061-19|Opetia nigra|COI-5P|MN868809
AACTTTATACTTTATTTTTGGAGCCTGAGCTGGTATAATTGGTACTTCAATAAGAATTATTATTCGAACAGAATTAGGAACTCCGGGAGCTTTAATTGGAGATGACCAAATTTATAATGTTATTGTAACTGCTCATGCTTTTATTATAATTTTTTTTATAGTAATACCTATTATAATAGGAGGATTTGGAAATTGACTAGTTCCCCTAATACTAGGGGCCCCAGATATAGCTTTCCCCCGAATAAATAACATAAGTTTCTGATTACTACCTCCTTCTTTAATATTACTTCTAATAAGAGGTCTAGTGGAAAATGGCGCTGGGACTGGTTGAACTGTTTATCCTCCTCTATCAACACTTATTTCACATAGAGGAGCTGCTGTAGATTTAGCAATTTTTTCACTTCATTTAGCGGGAATTTCTTCTATTTTAGGAGCAGTAAATTTTATTACAACAACAATTAATATACGATCAATAGGAATTACCTTAGACCGAATACCTTTATTTGTTTGATCAGTTTCTATTACAGCCTTTTTATTATTATTATCTTTACCTGTACTAGCAGGAGCTATTACAATACTATTAACAGATCGAAACTTAAATACTTCTTTTTTTGATCCAGCAGGAGGAGGAGATCCTATCCTTTATCAACACTTATTT
>IBIDP063-19|Anthrax anthrax|COI-5P|MN868778
AACTCTATACTTTATTTTTGGAGCATGAGCTGGAATAGTCGGAACCTCATTAAGAATTTTAGTTCGAGCTGAACTAGGACATCCTGGATCTTTTATTGGAGATGACCAGATCTATAATGTAATCGTAACCGCTCATGCTTTCATTATAATTTTCTTTATAGTGATACCAATTATAATTGGTGGATTTGGTAACTGATTAGTACCCCTTATATTAGGGGCTCCCGATATAGCCTTCCCACGAATAAATAATATAAGTTTTTGAATATTACCTCCCTCTTTATCTCTCCTTCTTGCAAGATCTATAGTAGAAAGAGGAGCAGGAACAGGATGAACTGTTTACCCTCCCCTCTCAGCAGGAATTGCTCACGGAGGAGCTTCAGTTGACCTAGCTATTTTCTCTTTACATTTAGCAGGGATTAGTTCAATTTTAGGAGCTGTTAACTTTATTACAACAGTTATTAATATACGATCATCTGGAATCACTTTTGACCGAATGCCACTTTTTGTATGATCAGTTGTAATTACAGCCATCCTTCTACTATTATCTCTACCTGTATTAGCAGGAGCTATTACAATATTATTAACAGACCGAAACTTAAATACTTCATTTTTTGATCCAGCAGGAGGAGGAGACCCTATTTTATACCAACATTTATTT
>IBIDP066-19|Melanophora roralis|COI-5P|MN868746
TACTTTATATTTTATTTTAGGATCTTTATCTGGTATAATTGGAACTTCTTTAAGAATTTTAATTCGAGCTGAATTAGGACACCCTGGTGCATTAATTGGTGATGACCAAATTTATAATGTAATTGTTACAGCTCATGCTTTTATTATAATTTTTTTTATAGTAATACCAATTATAATTGGAGGATTTGGAAATTGATTAGTCCCTTTAATATTAGGAGCTCCAGATATAGCATTTCCACGAATAAACAATATAAGTTTTTGACTTTTACCTCCTGCATTAATTTTACTTATAATAAGTAGTATAGTAGAAAACGGAGCTGGTACAGGATGAACTGTTTACCCCCCTCTATCTTCTAATATTGCTCATAGTGGAGCTTCTGTAGATTTAGCAATTTTTTCATTACACTTAGCTGGAATTTCTTCAATTTTAGGTGCTGTAAATTTTATTACAACTATTATTAATATACGTGCTATTGGAATTACATTTGACCGTATACCATTATTTGTATGATCTGTAATAATTACAGCTTTATTACTTCTTTTATCTCTACCAGTATTAGCAGGTGCTATTACAATATTATTAACTGATCGAAATCTTAATACTTCATTTTTTGATCCTGCAGGAGGAGGTGATCCAATTTTATACCAACATTTATTT
>IBIDP068-19|Opomyza petrei|COI-5P|MN868818
TACTTTATATTTTATATTTGGAGCTTGAGCAGGAATAGTTGGAACATCTCTAAGAATTCTAATTCGAGCTGAACTTGGACATCCTGGTGCTTTAATTGGAGACGACCAGATTTATAATGTTATTGTAACAGCTCATGCTTTTGTAATAATTTTTTTTATAGTAATACCTATTATAATTGGAGGATTTGGGAATTGACTAGTACCTTTAATATTAGGTGCGCCTGATATAGCTTTTCCTCGAATAAATAATATAAGATTCTGACTACTTCCTCCTTCATTAACACTTTTATTAGTAAGTAGTATAGTTGAAAACGGAGCAGGAACAGGATGAACGGTTTATCCCCCCCTTTCATCAGGAATTGCACATGGAGGAGCTTCTGTAGATTTAGCAATTTTTTCCTTACACCTTGCAGGAATCTCTTCTATTTTAGGAGCTGTAAATTTTATTACCACTGTAATTAATATACGATCAACAGGAATTACATTTGACCGAATACCTTTATTTGTATGATCTGTTGTAATTACAGCTATTTTATTGCTTTTATCTTTACCTGTTTTAGCAGGAGCAATTACTATACTATTAACGGATCGAAACCTAAACACTTCTTTTTTTGACCCTGCAGGTGGAGGAGACCCTATTTTATATCAACACCTATTT
>IBIDP071-19|Myathropa florea|COI-5P|MN868794
TACATTATATTTTATTTTTGGAACATGGGCAGGAATAGTAGGAACTTCATTAAGAATTTTAATTCGAGCTGAACTAGGACATCCTGGAGCCTTAATTGGTGATGATCAAATTTATAATGTTATTGTAACAGCTCATGCTTTTGTAATAATTTTTTTTATAGTTATACCTATTATAATTGGTGGATTCGGAAATTGATTAGTTCCTTTAATATTAGGAGCTCCTGATATAGCCTTTCCTCGAATAAATAATATAAGTTTTTGACTACTTCCACCTTCTTTAACTTTATTATTAGTAAGAAGTATAGTAGAAAATGGAGCCGGAACTGGTTGAACAGTTTATCCACCTTTATCAAGAAATATTGCTCATGGTGGAGCATCTGTAGATTTAGCAATTTTTTCACTTCATTTATCTGGGATATCTTCAATTTTAGGTGCCGTAAATTTTATTACAACTGTAATTAATATACGATCAACAGGAATCACTTATGATCGAATACCTTTATTTGTATGATCTGTAGCAATTACTGCTCTTTTACTTCTATTATCTTTACCAGTTTTAGCTGGAGCTATTACAATATTATTAACAGATCGAAATTTAAATACATCATTTTTTGATCCAGCAGGAGGAGGAGACCCAATTTTATATCAACATCTATTT
>IBIDP072-19|Polietes meridionalis|COI-5P|MN868727
AACACTATATTTTATTTTCGGAGCATGATCAGGTATAATTGGAACTTCATTAAGAATTTTAATTCGAGCTGAATTAGGACATCCTGGAGCATTAATTGGAGATGATCAAATTTATAATGTAATTGTTACTGCTCATGCTTTTGTTATAATTTTCTTTATAGTAATACCTATTATAATTGGAGGATTTGGAAATTGATTAGTTCCTTTAATATTAGGAGCTCCTGATATAGCTTTTCCTCGAATAAATAATATAAGTTTTTGACTTTTACCCCCTGCTTTAACATTATTATTAGTTAGAAGAATAGTAGAAAAGGGAGCTGGAACAGGATGAACTGTTTACCCACCTTTATCATCCAATATTGCTCATGGAGGAGCTTCTGTTGATTTAGCTATTTTTTCTTTACATTTAGCTGGAATTTCCTCAATTCTTGGAGCTGTAAATTTTATTACTACTGTTATTAATATACGATCTACTGGAATTACATTTGATCGTATACCATTATTTGTTTGATCTGTAGTAATTACAGCTTTATTATTACTTTTATCCCTTCCAGTATTAGCAGGAGCTATTACAATATTATTAACTGATCGAAATTTAAATACTTCTTTTTTTGACCCAGCCGGAGGAGGAGATCCAATCTTATATCAACATCTATTC
>IBIDP075-19|Coenosia atra|COI-5P|MN868753
AACTTTATATTTTATTTTTGGTGCTTGATCAGGAATAGTAGGTACATCTTTAAGAATTTTAATTCGAGCTGAATTAGGACATCCTGGAGCTTTAATTGGAGATGACCAAATTTATAATGTAATTGTAACTGCTCATGCATTTATTATAATTTTTTTTATAGTAATACCAATTATAATTGGAGGATTTGGAAATTGATTAGTTCCTTTAATATTAGGAGCTCCAGATATAGCCTTTCCTCGAATAAATAATATAAGATTTTGATTACTACCCCCAGCTTTAACCTTACTCCTAGCAAGTAGTATAGTTGAAAATGGAGCTGGAACTGGTTGAACAGTATACCCTCCTCTATCTTCTAATATTGCTCATGGTGGAGCTTCTGTTGATTTAGCAATTTTTTCACTTCATTTAGCAGGAATTTCTTCAATTTTAGGAGCTGTAAATTTTATTACTACTGTAATTAATATACGATCAACAGGAATTACATTTGATCGAATACCTTTATTTGTATGATCAGTAGCTATTACAGCTTTATTATTACTATTATCTTTACCTGTATTAGCCGGAGCTATTACAATATTATTAACAGATCGAAACTTAAATACTTCATTTTTTGATCCTGCTGGAGGAGGAGATCCAATTTTATATCAACATTTATTT
>IBIDP076-19|Schoenomyza litorella|COI-5P|MN868887
AACTTTATACTTTATTTTTGGAGCTTGATCCGGAATAGTAGGAACTTCTTTAAGAATTTTAATTCGAGCTGAATTAGGACACCCAGGAGCTTTAATTGGAGATGACCAAATTTATAATGTAATTGTAACTGCTCATGCATTCATTATAATTTTTTTCATAGTAATGCCAATTATAATTGGAGGATTTGGTAATTGACTAGTTCCATTAATACTAGGAGCACCAGATATAGCTTTTCCACGAATAAATAATATAAGTTTTTGATTACTACCTCCAGCATTAACTTTATTATTAGCAAGCAGTATAGTGGAAAACGGAGCTGGAACAGGATGAACAGTATACCCACCTCTGTCATCTAATATTGCTCATGGAGGAGCTTCTGTTGACTTAGCTATTTTTTCTTTACATTTAGCTGGAATTTCTTCAATTTTAGGGGCTGTAAATTTCATTACTACTGTAATTAATATACGATCAACAGGAATTACATTTGATCGAATACCCTTATTTGTTTGATCTGTAGCAATCACAGCTTTACTATTATTACTTTCATTGCCAGTTTTAGCAGGAGCTATTACAATGCTATTAACGGATCGAAATTTAAATACTTCTTTTTTTGACCCAGCAGGAGGAGGAGATCCAATTTTATATCAACATTTATTT
>IBIDP086-19|Cryptonevra flavitarsis|COI-5P|MN868828
AACATTATATTTTATATTTGGAGCATGAGCTGGAATAGTAGGAACTTCATTGAGAATCTTAATTCGAGCTGAACTTGGTCATCCAGGAGCCTTGATTGGTGATGATCAAATTTATAATGTTATTGTAACTGCACATGCATTTGTAATAATTTTTTTTATAGTAATACCTATTATAATTGGAGGATTCGGAAATTGATTAGTACCTTTAATATTAGGAGCTCCTGATATAGCATTCCCTCGAATAAATAATATAAGTTTTTGACTTTTACCTCCTTCATTAACTCTATTAATAGCAAGAAGTATAGTAGAAAACGGAGCTGGAACAGGATGAACTGTTTACCCTCCTTTATCTTCAATTATTGCTCATGGAGGAGCTTCAGTTGATTTAGCCATTTTTAGTTTACATTTAGCAGGAATCTCCTCAATTTTAGGAGCTGTAAATTTTATTACAACTGTAATTAATATACGATCTACAGGAATTACATTTGATCGAATACCTTTATTTGTTTGATCTGTTGTTATTACTGCTTTATTATTATTATTATCATTACCAGTTTTAGCTGGAGCTATTACTATATTATTAACTGATCGAAATCTTAATACTTCATTTTTTGATCCAGCAGGAGGAGGAGATCCAATTTTATACCAACATTTATTT
>IBIDP089-19|Pherbellia cinerella|COI-5P|MN868872
AACACTTTATTTCCTATTCGGAGCTTGAGCTGGAATAGTAGGAACATCTTTAAGAATCTTAATTCGTGCAGAATTGGGTCACCCAGGAGCTTTAATTGGTGATGATCAAATTTATAATGTAATTGTCACAGCTCATGCTTTTGTAATAATTTTCTTTATAGTAATGCCTATTATAATTGGAGGATTCGGGAATTGATTAGTACCCCTAATACTAGGAGCTCCCGATATAGCTTTTCCTCGAATGAATAATATGAGATTTTGGTTACTTCCACCTTCTTTAACGCTTTTATTAGTAAGCAGCATAGTGGAAAACGGGGCTGGTACAGGATGAACTGTTTACCCTCCTCTGTCTTCTACGATTGCTCATGGAGGTGCTTCTGTAGATTTAGCTATTTTTAGTCTTCATTTAGCAGGAATTTCATCTATTTTAGGAGCAGTAAATTTTATTACTACAGTAATTAATATACGATCATATGGAATTACTTTTGATCGAATACCCCTATTTGTTTGATCAGTAGTAATTACAGCTTTATTACTTTTACTATCATTACCTGTATTAGCCGGTGCCATCACAATACTTTTAACGGATCGAAATTTAAATACTTCTTTTTTCGACCCTGCTGGAGGAGGAGACCCTATTTTATACCAACATTTATTT
>IBIDP092-19|Chrysomya albiceps|COI-5P|MN868837
TACTTTATATTTCATTTTCGGAGCTTGATCTGGAATAGTAGGAACTTCTTTAAGAATTCTAATTCGAGCTGAATTAGGACATCCTGGAGCACTAATTGGAGATGACCAAATTTATAATGTAATTGTAACAGCTCATGCCTTTATTATAATTTTCTTTATAGTAATACCAATTATAATTGGAGGATTTGGAAATTGACTAGTTCCTTTAATATTAGGAGCCCCAGATATAGCTTTCCCACGAATAAATAATATAAGTTTCTGACTTTTACCTCCTGCATTAACTTTACTATTAGTAAGTAGTATAGTAGAAAATGGAGCTGGAACAGGATGAACTGTTTATCCACCTTTATCATCTAATATTGCTCATGGTGGAGCATCAGTTGATTTAGCTATTTTTTCTTTACACTTAGCTGGAATTTCATCAATTTTAGGAGCTGTAAATTTTATTACAACTGTTATTAATATACGATCTACAGGAATCACATTTGATCGAATACCTTTATTCGTATGATCTGTAGTTATTACTGCTCTTCTTTTATTATTATCATTACCAGTATTAGCCGGTGCAATTACTATATTATTAACTGATCGAAATTTAAATACTTCATTCTTTGATCCAGCAGGAGGAGGAGATCCTATTTTATATCAACATTTATTT
>IBIDP096-19|Muscina stabulans|COI-5P|MN868841
TACTTTATATTTTATTTTTGGAGCTTGATCAGGAATAGTAGGAACTTCCCTAAGTATCCTAGTACGAACTGAATTAGGACATCCTGGTGCTTTAATTGGGGATGACCAAATTTATAACGTAATTGTAACAGCCCATGCTTTTATTATAATTTTTTTCATAGTAATGCCTATTATAATTGGAGGATTTGGAAATTGATTAGTCCCTTTAATATTAGGAGCACCAGATATAGCATTCCCCCGAATAAATAATATAAGTTTTTGACTTTTACCTCCCGCATTAACATTATTACTTGTAAGTAGTATAGTTGAAAAGGGAGCTGGAACTGGTTGAACCGTTTACCCTCCTTTATCTTCTAATATTGCTCATGGAGGAGCTTCTGTAGATTTAGCTATTTTTTCTTTACATTTAGCAGGAATTTCTTCAATTTTAGGAGCTGTAAATTTTATTACAACCGTAATTAATATACGATCCACAGGTATTTCATTTGATCGTATACCCTTATTTGTTTGATCAGTAGTAATTACAGCATTATTACTTCTTTTATCCTTACCTGTTTTAGCTGGAGCTATTACAATATTATTAACAGATCGTAATTTAAATACTTCATTCTTTGACCCCGCAGGAGGAGGAGATCCAATTCTTTACCAACATTTATTT
>IBIDP097-19|Milesia crabroniformis|COI-5P|MN868868
AACATTATATTTTTTATTTGGTACATGAGCAGGAATAGTAGGAACTTCTCTAAGAATTTTAATTCGAGCAGAATTAGGTCATCCAGGTGCTTTAATTGGTGATGATCAAATTTATAATACTATTGTAACTGCACATGCTTTCGTAATAATTTTTTTTATAGTTATACCTATTATAATTGGAGGATTTGGAAATTGATTAGTTCCATTAATATTAGGAGCTCCTGATATAGCCTTTCCTCGAATAAATAATATAAGTTTCTGATTACTTCCTCCTTCATTAACTTTACTATTAATAAGTAGATTAGTAGAAAATGGATCAGGAACAGGATGAACAGTTTATCCTCCTCTTTCATCATCAATTGCTCATAGAGGAGCCTCTGTTGATTTAGCTATTTTTTCTCTTCATTTAGCCGGAATATCCTCTATTTTAGGAGCTGTAAATTTTATCACAACAGTTATTAATATACGAGCTTCTGGTATTTCTTATGACCGAATACCTTTATTTGTTTGATCTGTAATAATTACAGCTTTATTACTTTTATTGTCTTTACCTGTATTAGCCGGAGCCATTACAATATTATTAACAGATCGAAATTTAAATACTTCATTTTTTGATCCTGCTGGAGGTGGAGATCCAATTCTATATCAACATTTATTT
>IBIDP100-19|Ferdinandea cuprea|COI-5P|MN868888
TACTTTATATTTCTTATTCGGAATTTGAGCAGGAATAGTAGGAACTTCTTTAAGTTTATTAATTCGTGCAGAATTAGGACACCCAGGTGCATTAATTGGAGATGACCAAATTTATAATGTTATTGTTACTGCACATGCTTTTGTTATAATTTTTTTTATAGTAATACCAATTATAATTGGAGGATTTGGTAATTGATTAGTTCCTTTAATACTAGGAGCTCCTGACATAGCATTTCCTCGAATAAATAATATAAGTTTTTGACTTTTACCACCATCTTTAACTTTACTTTTAGTAAGAAGAATAGTAGAAAACGGAGCTGGAACAGGATGAACTGTTTACCCACCTCTTTCTTCTGTAATTGCACATGGTGGAGCTTCAGTTGATTTAGCAATTTTCTCTCTTCATTTAGCCGGTATATCATCTATTTTAGGGGCAGTAAATTTTATTACAACAGTTATTAATATACGTTCTACAGGTATTTCTTATGACCGAATACCTTTATTTGTATGATCAGTTGTAATTACTGCATTACTTTTACTACTATCTTTACCTGTACTAGCAGGTGCTATTACTATACTACTTACAGATCGAAACTTAAATACATCATTTTTTGATCCAGCAGGAGGAGGAGATCCAATTTTATATCAACATTTATTC
>IBIDP101-19|Orchisia costata|COI-5P|MN868764
AACATTATATTTTATTTTCGGAGCTTGATCCGGAATAGTAGGAACTTCTTTAAGTATTTTAATTCGAGCTGAATTAGGTCACCCAGGAGCTTTAATTGGAAATGATCAAATTTATAACGTAATTGTAACTGCTCATGCTTTTATTATAATTTTTTTTATAGTTATACCTATTATAATTGGAGGATTTGGAAACTGATTAGTTCCATTAATACTTGGAGCTCCAGATATAGCATTTCCTCGAATAAATAATATAAGTTTTTGACTTTTACCTCCTGCTTTAACTCTTCTCCTAGTAAGTAGTATAGTTGAAAATGGAGCTGGAACAGGATGAACTGTTTATCCACCTTTATCATCAAATATTGCTCATGGAGGAGCTTCTGTTGATTTAGCTATTTTTTCTTTACATTTAGCTGGAATTTCTTCAATTTTAGGTGCAGTAAATTTTATTACTACTGTAATTAATATACGATCAACAGGAATTACTTTTGATCGTATACCTTTATTTGTTTGATCTGTAGTAATTACAGCTCTTTTATTACTACTTTCTTTACCAGTATTAGCAGGAGCAATTACTATATTATTAACAGATCGTAATTTAAATACTTCATTCTTTGACCCAGCAGGAGGAGGGGATCCAATTTTATACCAACATTTATTT
>IBIDP103-19|Eristalinus sepulchralis|COI-5P|MN868716
TACATTATATTTTGTATTTGGTACATGAGCAGGAATAGTTGGTACTTCATTAAGAGTATTAATTCGAGCCGAATTAGGTCACCCAGGTGCTTTAATTGGTGATGATCAAATTTATAATGTTATTGTAACAGCTCATGCTTTTGTAATAATTTTCTTTATAGTTATACCTATTATAATTGGAGGATTTGGAAATTGATTAGTTCCTTTAATACTAGGAGCTCCTGATATAGCCTTCCCTCGAATAAATAATATAAGTTTTTGACTATTACCTCCTTCATTAACTTTATTATTAGTAAGTAGTATAGTAGAAAATGGAGCTGGAACTGGATGAACAGTTTATCCTCCATTATCAAGAAATATTGCTCACGGAGGAGCTTCAGTAGATTTAGCAATTTTTTCTTTACATTTATCTGGAATGTCATCAATTTTAGGAGCTGTAAATTTTATTACAACTGTAATTAATATACGTTCCACTGGTATTACTTATGACCGAATACCTTTATTTGTATGATCAGTAGCTATTACAGCTCTTCTATTACTTCTTTCATTACCAGTATTAGCTGGTGCTATTACAATATTATTAACAGACCGAAATTTAAATACATCTTTCTTTGATCCAGCCGGAGGAGGAGACCCAATTTTATATCAACACTTATTC
>IBIDP111-19|Periscepsia carbonaria|COI-5P|MN868775
TACTTTATATTTTATTTTCGGAGCTTGATCAGGAATAATTGGAACTTCATTAAGAATATTAATTCGAGCAGAATTAGGTCATCCAGGAGCTTTAATTGGAAATGATCAAACTTATAATGTAATTGTTACAGCTCACGCATTTATTATAATTTTTTTTATAGTTATACCTATTATAATTGGAGGATTTGGAAATTGATTAGTTCCTTTAATACTAGGAGCTCCAGATATAGCTTTCCCTCGAATAAATAATATAAGATTTTGATTATTACCACCTTCTTTACTTTTACTATTAGCAAGTAGTATAGTAGGAAATGGAGCTGGTACGGGTTGAACAGTTTACCCTCCTTTATCTTCTAATATTGCTCATGAAGGAGCTTCTGTAGATTTAGCAATTTTTTCATTACACTTAGCTGGAATTTCTTCTATTTTAGGAGCTGTAAATTTTATTACTACAGTTATTAATATACGATCAACAGGTATTACATTCGACCGTATACCATTATTTGTTTGATCTGTAGTTATTACAGCATTATTACTTTTATTATCTTTACCTGTTTTAGCTGGAGCTATTACTATATTATTAACAGATCGAAATTTAAATACTTCATTTTATGACCCTGCAGGAGGAGGAGACCCAATTCTATATCAACATTTATTT
>IBIDP128-19|Ilione trifaria|COI-5P|MN868852
CACTCTTTATTTCATTTTTGGAGCTTGGGCAGGAATAGTCGGAACTTCTCTTAGTATTCTAATTCGAGCAGAATTAGGCCATCCTGGTGCATTAATTGGAGATGATCAGATTTACAATGTTATTGTAACAGCTCATGCATTTGTTATAATTTTCTTTATAGTTATACCTATTATAATTGGAGGATTTGGTAACTGACTTGTCCCATTAATATTAGGTGCTCCTGATATAGCTTTTCCTCGAATAAATAATATAAGATTCTGATTACTCCCGCCTTCTTTAACCCTTCTCTTAGTGAGCAGTATAGTCGAAAATGGGGCTGGCACTGGTTGAACCGTTTACCCACCGTTATCATCTGTTATCGCCCATGGGGGAGCATCTGTAGACTTAGCTATTTTTAGCTTACATTTAGCTGGAGTATCCTCTATTTTAGGAGCTGTAAACTTTATTACTACTGTTATTAATATGCGCTCGACCGGTATTTCATTTGATCGAATGCCTTTATTTGTTTGATCAGTAGCTATTACTGCTCTACTCCTTTTACTGTCTCTCCCCGTATTAGCAGGAGCAATTACTATACTTTTAACGGATCGTAATCTTAACACATCATTTTTTGATCCAGCAGGAGGAGGAGATCCTATTTTATATCAACACTTATTT
>IBIDP131-19|Coenosia atra|COI-5P|MN868789
AACTTTATATTTTATTTTTGGTGCTTGATCAGGAATAGTAGGTACATCTTTAAGAATTTTAATTCGAGCTGAATTAGGACATCCTGGAGCTTTAATTGGAGATGACCAAATTTATAATGTAATTGTAACTGCTCATGCATTTATTATAATTTTTTTTATAGTAATACCAATTATAATTGGAGGATTTGGAAATTGATTAGTTCCTTTAATATTAGGAGCTCCAGATATAGCCTTTCCTCGAATAAATAATATAAGATTTTGATTACTACCCCCAGCTTTAACCTTACTCCTAGCAAGTAGTATAGTTGAAAATGGAGCTGGAACTGGTTGAACAGTATACCCTCCTCTATCTTCTAATATTGCTCATGGTGGAGCTTCTGTTGATTTAGCAATTTTTTCACTTCATTTAGCAGGAATTTCTTCAATTTTAGGAGCTGTAAATTTTATTACTACTGTAATTAATATACGATCAACAGGAATTACATTTGATCGAATACCTTTATTTGTATGATCAGTAGCTATTACAGCTTTATTATTACTATTATCTTTACCTGTATTAGCCGGAGCTATTACAATATTATTAACAGATCGAAATTTAAATACTTCATTTTTTGATCCTGCTGGAGGAGGTGATCCAATTTTATATCAACATTTATTT
>IBIDP132-19|Syritta pipiens|COI-5P|MN868864
AACTTTATATTTTATATTTGGAACTTGAGCAGGATTAGTAGGAACTTCCTTAAGAATTCTTATTCGAGCCGAATTAGGTCACCCTGGAGCTTTAATTGGAGATGACCAAATTTATAACGTAATTGTTACTGCTCATGCTTTTGTTATAATTTTTTTTATAGTTATACCAATTATAATTGGAGGGTTTGGAAATTGACTAGTTCCTTTAATACTGGGAGCACCAGATATAGCATTTCCACGAATAAATAATATAAGTTTTTGACTTTTACCTCCTTCTTTAACTTTATTATTAGTAAGTAGTATAGTAGAAAACGGAGCAGGAACAGGATGAACAGTGTATCCTCCTTTGTCAGCAGGAATTGCTCATAGTGGAGCTTCTGTAGATCTAGCAATCTTTTCTTTACATTTAGCAGGAATATCATCCATTTTAGGAGCTGTAAATTTTATTACAACTGTAATTAACATACGAGCAGCAGGAATAACATATGATCGAATACCTTTATTTGTATGATCAGTAGTTATTACAGCTCTTCTTCTTTTATTATCATTGCCAGTTTTAGCAGGTGCAATTACAATACTTTTAACAGATCGAAATTTAAATACTTCATTTTTCGACCCTGCTGGAGGAGGAGATCCAATTCTTTACCAACATTTATTT
>IBIDP133-19|Chalcosyrphus nemorum|COI-5P|MN868898
AACATTATATTTTTTATTTGGTACATGAGCCGGAATAGTAGGAACATCATTAAGAATTTTAATTCGTGCAGAATTGGGACATCCTGGAGCCTTAATTGGAGACGATCAAATTTATAATGTTATTGTAACTGCTCATGCTTTCGTAATAATTTTTTTTATAGTAATACCAATTATAATTGGAGGATTTGGAAATTGATTAGTTCCATTAATATTAGGAGCACCTGATATAGCATTTCCTCGAATAAATAATATAAGATTTTGACTACTTCCTCCTTCTTTAACTTTATTATTAGTAAGAAGTATAGTAGAAAATGGAGCTGGAACTGGATGAACAGTTTATCCACCATTATCAGCAACTATTGCTCATGGAGGAGCCTCAGTTGATTTAGCAATTTTTTCTTTACATTTAGCAGGAATATCATCAATTTTAGGAGCTGTAAATTTTATTACTACAGTAATTAATATACGATCTACAGGAATTACTTATGATCGAATACCTTTATTTGTTTGATCAGTAGTAATTACTGCGTTATTATTATTACTTTCACTTCCTGTTTTAGCAGGAGCAATTACTATACTTTTAACAGATCGAAATTTAAATACTTCATTTTTTGATCCTGCAGGAGGAGGAGATCCTATTTTATATCAACATTTATTT
>IBIDP148-19|Lispocephala miki|COI-5P|MN868901
AACATTATATTTCATTTTTGGAGCTTGATCTGGAATAGTCGGAACTTCCTTAAGAATTTTAATTCGAGCTGAATTAGGACACCCTGGAGCATTAATTGGAAATGATCAAATTTATAATGTAATTGTAACTGCTCATGCATTTATTATAATTTTCTTTATAGTAATACCTGTAATAATTGGAGGATTTGGAAATTGATTAGTTCCTCTAATACTTGGAGCTCCAGATATAGCTTTCCCTCGAATAAATAATATAAGTTTTTGACTTTTACCTCCTGCCTTAACATTATTATTAGTAAGTAGTATAGTGGAAAACGGAGCTGGAACTGGGTGAACTGTATACCCTCCTCTATCATCAAATATTGCTCACGGAGGAGCTTCCGTTGATTTAGCTATTTTTTCTTTACATTTAGCTGGAGCCTCTTCAATTTTAGGGGCAGTAAATTTTATTACTACTGTAATTAATATACGATCATCAGGAATTACTTTTGACCGAATACCATTATTTGTATGATCAGTAGTAATTACTGCATTATTATTACTTCTATCCCTTCCTGTATTAGCTGGTGCTATTACTATATTATTAACAGACCGAAATTTAAATACTTCCTTTTTTGATCCAGCTGGTGGAGGAGACCCAATTTTATACCAACATTTATTT
>IBIDP151-19|Exhyalanthrax afer|COI-5P|MN868725
AACTTTATACTTTATCTTTGGAGCTTGAGCAGGAATAGTAGGAACCTCTTTAAGAATTCTTGTACGAGCCGAATTAGGACATCCAGGATCTTTAATTGGTGATGATCAAATCTATAATGTTATTGTAACAGCTCACGCTTTCATCATAATTTTCTTTATAGTAATACCAATTATAATTGGAGGATTTGGTAATTGACTAGTACCTCTAATGTTAGGGGCCCCAGACATAGCCTTCCCACGTATAAATAATATAAGTTTTTGAATATTACCCCCTTCTCTTTCCCTACTACTAGCTAGTTCAATAGTAGAAAATGGAGCAGGAACAGGATGAACAGTATACCCTCCTCTATCAGCAAGAATTGCTCATGGAGGAGCCTCTGTAGATTTAGCTATTTTCTCACTTCACTTAGCAGGAATTTCTTCCATCCTAGGAGCAGTAAACTTCATTACAACAGTAATTAATATACGATCAACAGGAATTACTTTTGATCGTATACCCTTATTTGTTTGATCTGTAGTAATTACAGCAATTTTACTTCTATTATCTCTTCCTGTTCTAGCCGGAGCTATTACTATGCTTCTTACTGATCGAAATTTAAATACCTCTTTCTTCGACCCTGCTGGTGGTGGTGACCCTATCCTATATCAACATTTATTT
>IBIDP152-19|Camarota curvipennis|COI-5P|MN868819
AACATTATATTTTATATTTGGAGCTTGAGCTGGAATAGTAGGAACTTCATTAAGAATTCTAATTCGAGCTGAATTAGGTCATCCTGGAGCTTTAATTGGTGATGATCAAATTTATAATGTAATTGTTACTGCTCATGCTTTTGTAATAATTTTTTTTATAGTAATACCAATTATAATTGGAGGTTTTGGAAATTGATTAGTTCCATTAATATTAGGAGCACCAGATATAGCTTTTCCTCGAATAAATAATATAAGTTTTTGATTATTACCCCCATCTTTAACTCTATTAATAGCAAGTAGTATAGTAGAAAATGGAGCTGGAACAGGATGAACAGTTTATCCACCTTTATCATCTATTATTGCTCACGGAGGAGCTTCTGTTGATTTAGCTATTTTTTCTTTACATTTAGCTGGAGTTTCATCAATTTTAGGAGCAGTAAATTTTATTACTACAGTAATTAATATACGATCAACAGGAATCACATTTGATCGAATACCATTATTTGTTTGATCAGTAGTAATTACAGCTCTTCTTCTTCTTTTATCATTACCTGTTTTAGCTGGAGCTATTACTATACTATTAACAGATCGAAATTTAAATACTTCATTCTTTGATCCAGCAGGAGGAGGAGATCCTATTTTATACCAACATTTATTT
>IBIDP158-19|Elachiptera bimaculata|COI-5P|MN868793
AACTTTATATTTTATATTTGGAGCTTGAGCAGGAATAGTTGGAACTTCTTTAAGAATTTTAATTCGAGCCGAATTAGGTCATCCTGGAGCTCTAATTGGTGATGACCAAATTTATAATGTAATTGTAACTGCTCATGCTTTTGTAATAATTTTTTTTATAGTAATACCTATTATAATTGGAGGATTTGGAAATTGACTAGTTCCCCTAATACTAGGAGCCCCTGATATAGCATTTCCTCGAATAAATAATATAAGTTTTTGATTATTACCCCCTTCATTAACGCTATTAATAGCAAGTAGTATAGTAGAAAACGGGGCTGGTACAGGATGAACTGTTTATCCTCCTTTATCTTCTATTATTGCTCATGGAGGAGCTTCAGTTGATTTAGCTATTTTTTCTTTACATTTAGCTGGAATTTCATCTATTTTAGGAGCTGTAAATTTTATTACAACTGTAATTAATATACGATCTACAGGAATTACATTTGATCGAATACCATTATTTGTATGATCAGTTGTAATTACAGCATTATTGTTATTATTATCATTACCAGTATTAGCTGGAGCAATTACTATATTATTAACTGACCGAAATTTAAATACATCATTTTTTGACCCTGCAGGAGGAGGAGATCCAATTTTATATCAACATTTATTT
>IBIDP160-19|Eutropha fulvifrons|COI-5P|MN868862
AACATTATATTTTATATTTGGAGCATGAGCTGGAATAGTGGGAACATCTCTTAGAATTCTAATTCGAGCTGAACTAGGTCACCCAGGTGCATTAATTGGAGATGACCAAATTTATAATGTAATTGTTACTGCACATGCTTTTGTAATAATTTTCTTTATAGTTATACCTATTATAATTGGAGGATTTGGAAATTGATTAGTTCCATTAATATTAGGAGCTCCTGATATAGCTTTTCCTCGAATAAATAATATAAGTTTTTGACTTCTTCCACCTTCTTTAACTCTATTAATAGCAAGAAGAATGGTTGAAAATGGAGCTGGTACAGGATGAACTGTTTACCCACCATTATCATCAATTATCGCTCATGGAGGAGCATCAGTAGATTTAGCAATTTTTTCTCTTCATCTTGCTGGTGTTTCATCAATTTTAGGAGCAGTAAATTTTATTACAACAGTAATTAATATACGATCAACAGGTATTACATTTGATCGAATACCTTTATTTGTATGATCAGTTGTAATTACAGCTTTATTATTACTTTTATCATTACCCGTATTAGCTGGTGCAATTACTATGTTATTAACAGACCGAAATTTAAATACCTCATTTTTTGACCCAGCAGGAGGGGGAGATCCAATTTTATACCAACATTTATTT
>IBIDP161-19|Canace nasica|COI-5P|MN868748
AACTTTATATTTTATATTTGGAGCTTGAGCTGGAATAGTAGGAACTTCTTTAAGAGTTTTAATTCGAGCCGAATTAGGACATCCTGGTGCATTAATTGGTGATGATCAAATTTATAATGTAATTGTAACAGCCCATGCATTTATTATAATTTTTTTTATAGTAATACCTATTATAATTGGAGGATTTGGAAACTGATTAGTTCCACTAATATTAGGAGCTCCTGATATAGCTTTCCCTCGAATAAATAACATAAGATTTTGATTATTACCTCCTTCTTTAACATTATTGTTAGTCAGAAGTATAGTAGAAAACGGAGCTGGGACAGGTTGAACAGTTTACCCTCCTCTTTCTTCTGCAATTGCTCATAGAGGTGCTTCTGTAGATTTAGCTATTTTCTCATTACATCTTGCAGGAATTTCTTCTATTTTAGGAGCTGTAAATTTTATTACTACAGTAATTAATATACGATCAACAGGTATCACATTTGACCGAATACCTCTATTTGTATGATCTGTAGTAATTACAGCATTATTACTATTATTATCACTACCAGTATTAGCCGGAGCCATTACAATACTATTAACAGATCGAAATTTAAATACATCTTTTTTTGATCCAGCAGGTGGAGGAGACCCTATTTTATATCAACACTTATTT
>IBIDP163-19|Besseria dimidiata|COI-5P|MN868773
AACTTTATATTTTATTTTTGGAGCTTGATCTGGAATAGTAGGAACTTCATTAAGAATTTTAATTCGAACTGAATTAGGACATCCAGGATCATTAATTGGAGATGATCAAATTTTTAATGTTATTGTAACAGCTCATGCTTTTATTATAATTTTTTTTATAGTAATACCAATTATAATTGGTGGATTTGGAAATTGATTAGTACCTTTAATATTAGGAGCTCCAGATATAGCATTTCCACGAATAAACAATATAAGTTTTTGATTATTACCTCCTGCACTAATTTTATTATTAGTCGGTAGTATAGTAAATAATGGAGCTGGTACAGGATGAACTGTTTACCCTCCTTTATCTTCTAATATTGCACATAATGGAGCCTCAGTTGATTTAACTATTTTTTCATTACATTTAGCTGGTGTTTCATCAATTTTAGGTGCTATTAATTTTATTACTACAATTATCAATATACGATCAGTAGGAATTACTTTTGATCGAATACCTTTATTTGTATGATCAGTAGGAATTACAGCATTATTATTACTTTTATCACTACCAGTATTAGCCGGAGCAATTACTATATTATTAACAGATCGAAACTTAAATACATCTTTTTTTGATCCAGCAGGAGGAGGAGATCCAATTTTATATCAACATTTATTT
>IBIDP164-19|Conops flavipes|COI-5P|MN868850
AACTCTCTACTTTTTATTTGGGGCATGAGCTGGAATAGTAGGTACATCACTAAGTATATTGATTCGTGTAGAATTAGGTCACCCTGGAACCTTTATTGGAAACGATCAAATTTATAATGTAATTGTTACAGCCCATGCATTTGTAATAATTTTCTTTATAGTAATACCAATTATAATTGGAGGATTTGGAAATTGACTAGTACCCCTAATACTAGGAGCCCCTGATATAGCTTTCCCTCGAATAAATAATATAAGATTCTGATTATTACCCCCATCATTAACTTTACTTCTAGTAAGTAGAATAGTTGAAAGAGGAGCTGGAACCGGATGAACAGTATACCCACCATTATCTTCAATTATTGCTCATAGAGGTGCTTCAGTTGATCTAGCAATTTTTAGTTTACATTTAGCAGGAGTTTCATCAATTCTAGGTGCAGTAAATTTTATTACTACAGTAATTAATATACGATCAGAAGGAATTACTTTAGATCGCATACCACTATTCGTATGATCTGTCGTAATTACTGCTCTATTACTATTGCTATCTCTTCCAGTATTAGCCGGAGCTATTACAATACTATTAACTGATCGAAATCTTAATACTAGTTTTTTTGATCCTGCAGGAGGTGGAGATCCAATTTTATATCAACATCTTTTC
>IBIDP168-19|Euthycera cribrata|COI-5P|MN868908
AACACTGTATTTTATTTTTGGTGCATGAGCTGGAATAGTGGGTACTTCATTAAGCATTCTCATTCGTGCTGAATTAGGACATCCTGGAGCCCTGATTGGGGATGATCAAATTTATAATGTGATTGTCACAGCTCATGCATTTATCATAATTTTTTTCATAGTAATACCTGTTATAATTGGAGGATTTGGAAATTGACTAGTACCCCTAATACTAGGAGCCCCAGATATAGCTTTTCCTCGAATAAACAATATAAGATTTTGACTTCTTCCTCCGTCTTTGTCCCTTCTTCTAGTCAGCAGTATAGTCGAAAATGGAGCTGGCACTGGGTGAACGGTTTACCCCCCGTTATCTTCAGTTATTGCCCATAGAGGAGCTTCTGTTGATCTAGCTATTTTTAGACTTCATTTAGCTGGTGTTTCATCAATTTTAGGGGCTGTAAATTTTATTACTACTGTCATTAATATACGGTCTTCGGGAATTTCATTTGATCGAATACCTTTATTCGTATGATCAGTAGCAATCACTGCTCTTCTTCTTCTTCTTTCTCTTCCTGTATTAGCTGGAGCCATTACAATACTTTTAACCGATCGAAATTTAAATTCTTCTTTCTTCGATCCAGCTGGTGGAGGAGACCCTGTCCTGTACCAGCATCTGTTT
>IBIDP172-19|Diastata adusta|COI-5P|MN868848
AACTTTATATTTTATTTTCGGAGCTTGAGCAGGAATAGTTGGAACTTCTTTAAGAATTTTAATTCGAGCTGAATTAGGACACCCAGGAGCATTAATTGGTGACGATCAAATTTATAATGTAATCGTTACAGCCCATGCTTTTATTATAATTTTTTTTATGGTTATACCAATTATAATTGGAGGATTTGGAAATTGATTAGTCCCTTTAATACTTGGAGCTCCAGATATAGCATTTCCTCGAATAAATAATATAAGTTTTTGACTACTTCCGCCTGCTTTAACACTATTATTAGTCAGAAGTATGGTTGAAAACGGAGCTGGTACAGGGTGAACAGTTTACCCCCCGCTATCTTCAGGAATCGCTCATGGAGGAGCATCAGTTGATTTAGCAATTTTTTCTCTCCATTTAGCAGGAGTTTCTTCAATTCTAGGAGCAGTTAATTTTATTACAACAGTAATTAATATACGATCTACTGGAATTACACTAGATCGAATACCTTTATTTGTCTGATCCGTAGTAATTACTGCATTATTATTACTTTTATCTTTACCTGTTTTAGCCGGAGCTATCACAATACTATTAACGGATCGAAACTTAAATACTTCATTTTTTGACCCAGCAGGAGGAGGTGACCCAATTTTATACCAACATTTATTT
>IBIDP177-19|Clogmia albipunctata|COI-5P|MN868763
TACTTTATATTTTATTTTTGGAAGCTGAGCAAGCATAATTGGAACTTCTTTAAGATTAATTATTCGAACAGAATTAGGCCACCCAGGATCTTTAATTGGGAATGACCAAATTTATAATACAATTGTAACTGCTCATGCTTTTATTATAATTTTTTTTATAGTAATACCTATTATAATTGGAGGATTTGGAAATTGATTAGTTCCTTTAATACTCGGAGCTCCAGATATAGCCTTTCCACGAATAAATAATTTAAGATTTTGACTTTTACCCCCTTCTATATTACTTCTTCTTAATAGATCAATAGTAGACACAGGAGCTGGTACGGGATGAACTGTTTATCCTCCTTTATCAAATATTATTGCACACGGGGGTCCTTCTGTAGATTTAGCTATTTTTTCTCTTCATTTGGCCGGGATTTCCTCTATTTTAGGGGCCGTAAATTTTATTACAACAATTATTAATATACGATCCCCAGGTATTACATTTGATCGAATGCCTTTATTTGTTTGGTCAGTGTTTATTACAGCAGTTTTATTACTACTTTCCCTTCCAGTATTAGCAGGAGCGATTACAATACTTTTAACAGATCGAAATTTAAATACTTCTTTTTTTGACCCCGCAGGAGGAGGAGATCCAATTTTATACCAACATTTATTT
>IBIDP374-19|Elachiptera megaspis|COI-5P|MN868711
AACATTATATTTTATATTTGGGGCTTGAGCTGGAATAGTAGGTACATCATTAAGTATTCTAATTCGAGCTGAATTAGGTCACCCAGGTGCTTTAATTGGAGATGATCAAATTTATAATGTAATTGTTACTGCTCATGCTTTTGTAATAATTTTTTTTATAGTAATACCTATTATAATTGGAGGATTTGGAAATTGATTAGTTCCACTAATATTAGGAGCTCCTGATATAGCATTTCCTCGAATAAATAATATAAGTTTTTGATTATTACCACCTTCATTGACTTTATTAATGGCTAGAAGTATAGTTGAAAACGGAGCTGGAACAGGATGAACAGTTTATCCTCCATTATCTTCTATTATTGCTCATGGAGGTGCTTCAGTTGATTTAGCTATTTTTTCATTACATTTAGCTGGAGTATCTTCAATTTTAGGAGCTGTAAATTTTATTACAACTGTTATTAATATACGATCAACAGGTATTTCATTTGATCGAATACCATTATTTGTATGATCAGTAGTAATTACAGCATTATTATTACTTTTATCATTACCAGTATTAGCTGGAGCTATTACTATATTATTAACAGATCGAAATTTAAATACTTCATTTTTTGATCCAGCAGGTGGAGGAGATCCAATTTTATATCAACATTTATTT
>IBIDP376-19|Chrysops caecutiens|COI-5P|MN868849
AACACTTTACTTTATTTTCGGAGCTTGAGCCGGAATAATTGGAACATCATTAAGTATTTTAATTCGTGCTGAACTAGGTCATCCAGGAGCCTTAATTGGTGATGATCAAATTTATAATGTAATTGTAACTGCTCATGCATTTGTTATAATTTTCTTTATAGTAATACCTATTATAATTGGAGGATTTGGGAATTGATTAGTACCTTTAATATTAGGAGCCCCTGATATAGCATTTCCTCGAATAAATAATATAAGTTTCTGATTATTACCCCCTTCATTAACCCTTTTATTAGTTAGAAGTATAGTTGAAAATGGAGCAGGGACTGGTTGAACTGTATACCCCCCTTTATCAGCTGCTATTGCTCATGGAGGAGGATCAGTTGATTTAGCAATTTTTTCTTTACATTTAGCTGGAATTTCATCAATTTTAGGGGCTGTAAATTTTATTACAACAGTAATTAATATACGATCAACAGGAATTACATTTGATCGTATACCTTTATTTGTTTGAGCTGTGGTTATTACAGCAATTTTACTTTTATTATCTTTACCAGTTTTAGCTGGTGCAATTACTATACTTTTAACAGATCGAAATTTAAATACATCATTTTTCGATCCAGCCGGAGGAGGAGACCCTATTTTATACCAACACTTATTT
>IBIDP377-19|Syrphus vitripennis|COI-5P|MN868776
AACATTATATTTTATTTTTGGAACTTGAGCTGGTATAGTAGGAACATCATTAAGTGTATTAATTCGTGCAGAACTTGGTCATCCAGGAGCTTTAATTGGAGATGATCAAATTTATAATGTTATTGTAACTGCTCATGCTTTTGTTATAATTTTTTTTATAGTAATACCAATTATAATTGGAGGATTTGGTAATTGATTAGTTCCTTTAATATTAGGAGCTCCTGATATAGCATTTCCTCGTATAAATAATATAAGTTTTTGATTATTACCTCCTTCTTTAACTCTTTTATTAGTAAGAAGAATAGTTGAAAATGGAGCTGGAACAGGATGAACAGTTTATCCTCCTCTTTCTGCTAGAATTGCACATGGAGGAGCTTCTGTTGATTTAGCAATTTTTTCTCTTCATTTAGCTGGTATATCATCTATTTTAGGAGCAGTAAATTTTATTACAACAGTAATTAATATACGATCAAGTGGACTTACATATGATCGAATACCTTTATTTGTTTGATCAGTAGTAATTACAGCATTATTATTACTTCTATCTTTACCAGTTTTAGCTGGAGCTATTACTATACTTTTAACTGATCGAAATTTAAATACATCATTTTTTGACCCAGCAGGAGGAGGTGATCCAATTTTATACCAACATTTATTT
>IBIDP378-19|Chloromyia formosa|COI-5P|MN868735
AACCCTATATTTTATTTTCGGGGCATGGGCTGGAATAGTAGGTACCTCACTTAGTATACTTGTACGAGCAGAATTAGGTCATCCAGGCGCTTTAATTGGAGATGACCAAATTTATAACGTAATTGTAACAGCTCATGCATTTGTAATGATTTTTTTTATAGTAATGCCTATTATAATTGGAGGATTTGGTAATTGACTGGTCCCTTTAATATTAGGTGCCCCAGATATAGCATTCCCTCGAATGAATAACATAAGTTTTTGAATACTTCCGCCTTCCCTCACTCTACTTCTTACTTCTTCAATAGTAGACGCCGGAGCTGGAACCGGATGAACTGTTTATCCCCCCTTAGCCTCAGGAATTGCTCATGCGGGCGCATCTGTAGATTTAGCAATTTTTTCATTGCATCTAGCTGGTATTTCATCTATCTTAGGGGCTGTAAATTTTATTACAACAGTAATTAATATGCGATCTGCAGGAATTACCTTTGACCGAATACCCCTATTTGTATGATCTGTGGTAATTACTGCAATTCTATTACTTCTTTCGCTCCCAGTACTAGCCGGAGCTATCACTATATTATTAACCGATCGAAATCTAAACACCTCTTTCTTTGACCCCGCGGGAGGAGGTGACCCCATCTTATATCAACATTTATTT
>IBIDP379-19|Ptychoptera albimana|COI-5P|MN868771
AACTTTATATTTTATTTTAGGAGCTTGGGCAGGAATAGTAGGAACCTCATTAAGCATATTAATTCGAGCAGAATTAGGACATCCAGGAAGTTTAATTGGTGATGATCAAATTTATAATGTGATTGTAACAGCCCATGCTTTTGTAATAATTTTTTTTATAGTAATACCTATTATAATTGGAGGATTTGGTAATTGATTAGTCCCTTTAATACTGGGAGCCCCAGATATAGCTTTCCCACGAATAAATAATATAAGATTTTGAATACTTCCCCCATCTTTAACTTTATTATTAGCCAGTAGTATAGTTGAAAATGGGGCAGGGACAGGATGAACAGTTTATCCCCCACTTTCTTCAGGAATTGCACATGCTGGAGCCTCTGTTGATCTGGCAATTTTTTCTTTACATTTAGCAGGTATTTCTTCAATTTTAGGAGCTGTAAATTTTATTACTACTGTAATTAATATACGAGCAAATGGAATTTCCTTAGATCGAATACCTCTATTTGTATGATCAGTAGTAATTACTGCAGTATTATTACTTTTATCTTTACCAGTTTTAGCCGGAGCTATCACTATATTATTAACAGATCGAAATCTAAATACTTCATTTTTTGACCCTGCAGGGGGAGGGGACCCCATTTTATATCAACATTTATTT
>IBIDP386-19|Dasysyrphus albostriatus|COI-5P|MN868722
AACTTTATATTTTTTATTTGGAACTTGAGCTGGAATAGTAGGTACTTCTCTAAGTGTATTAATTCGTGCTGAACTTGGACACCCCGGAGCTTTAATTGGAGATGATCAAATTTATAATGTTATTGTTACTGCTCATGCTTTTGTAATAATTTTTTTTATAGTAATACCAATTATAATTGGAGGATTTGGAAATTGACTAGTTCCTTTAATATTAGGAGCTCCCGATATAGCTTTTCCTCGAATAAATAACATAAGTTTTTGATTATTACCTCCTTCTTTAACACTTTTATTAGTAAGAAGAATAGTTGAAAATGGAGCTGGAACAGGTTGAACAGTTTATCCTCCTCTTTCAGCAAGAATTGCTCATGGTGGGGCCTCTGTAGATTTAGCTATTTTTTCTCTTCACTTAGCTGGTATATCATCAATTTTAGGGGCAGTAAATTTTATTACAACTGTAATTAATATACGATCTAATGGAATTTCATATGATCGAATACCTTTATTTGTATGATCAGTAGTTATTACAGCTTTATTACTTCTTTTATCTTTACCTGTATTAGCAGGAGCTATTACTATACTTTTAACTGATCGAAATTTAAATACTTCATTTTTTGACCCTGCAGGTGGAGGAGACCCAATTTTATACCAACATTTATTT
>IBIDP391-19|Molobratia teutonus|COI-5P|MN868906
AACATTATACTTCATCTTTGGAGCATGAGCAGGAATAGTAGGAACTTCCTTAAGAATTTTAATTCGAGCAGAACTTGGGCATCCTGGATCACTAATTGGAGATGACCAAATTTATAACGTTATTGTAACAGCCCATGCATTTATTATGATTTTCTTTATAGTAATACCTATTATAATTGGGGGATTTGGTAATTGATTAGTGCCATTAATATTAGGGGCACCTGACATAGCTTTTCCTCGAATAAATAATATAAGATTTTGGCTTTTACCCCCATCTCTAACCCTTCTTCTTGCAAGAAGAATAGTGGAAAGTGGGGCCGGAACTGGATGAACAGTTTACCCACCCTTATCAGCTGGAATTGCACACAGAGGAGGATCAGTTGATTTAGCAATCTTCTCATTACATTTAGCTGGAATTTCATCAATTTTAGGAGCCGTAAATTTCATTACTACAATCATTAATATACGTTCAACTGGAATTACATTTGATCGCATACCTTTATTTGTATGATCAGTTATAATTACTGCTATTTTATTACTACTATCATTACCTGTTCTAGCAGGAGCTATCACTATGTTATTAACTGACCGAAACTTAAATACATCGTTTTTTGACCCTGCTGGAGGAGGTGATCCAATTTTATATCAACATTTATTT
>IBIDP007-19|Subhylemyia longula|COI-5P|MN868762
TACTTTATATTTTATTTTTGGAGCATGAGCCGGAATAATTGGTACATCTTTAAGTATTTTAATTCGAGCTGAATTAGGTCATCCAGGTGCGTTAATTGGAAATGATCAAATTTACAATGTAATTGTAACAGCTCATGCTTTTATTATAATTTTTTTTATGGTAATACCCATCATAATTGGAGGATTTGGAAATTGATTAGTTCCCCTTATACTAGGAGCCCCTGACATAGCTTTTCCTCGAATAAATAATATAAGTTTTTGACTTTTACCTCCTGCATTATCTTTATTATTAGTCAGTAGTATAGTGGAAAACGGATCTGGTACAGGGTGAACTGTTTACCCTCCTTTATCTTCTAATATTGCTCATAGTGGAGCTTCTGTAGATTTAGCTATTTTTTCTTTACATTTAGCGGGAATTTCATCAATTTTAGGGGCTGTAAATTTTATTACAACTGTAATTAATATACGATCTACAGGAATCACTTTTGATCGAATACCATTATTTGTTTGATCAGTAGTAATTACAGCTTTATTACTTTTGTTATCTTTACCAGTTTTAGCAGGAGCTATTACTATATTATTAACAGATCGAAATTTAAATACTTCATTTTTTGATCCAGCGGGAGGAGGAGATCCTATTCTTTATCAACATCTTTTT
>IBIDP008-19|Paragus quadrifasciatus|COI-5P|MN868744
AACATTATATTTTTTATTTGGAGCATGAGCTGGGATAGTAGGAACATCATTAAGTATTTTAATTCGTGCAGAATTAGGTCATCCAGGAGCATTAATTGGTGATGATCAAATTTATAATGTAATTGTTACAGCCCACGCTTTTATTATAATTTTCTTTATAGTTATACCAATTATAATTGGAGGGTTTGGAAATTGACTTGTGCCTTTAATATTAGGAGCACCTGATATAGCATTCCCTCGAATGAATAATATAAGTTTTTGATTATTGCCTCCTTCTTTAACATTATTATTAATAAGTAGTATAGTAGAAAATGGATCTGGTACAGGTTGAACTGTTTACCCTCCTCTTTCTGCTAGAATTGCTCATGGTGGAGCTTCTGTTGATTTAGCTATTTTTTCTTTACATTTAGCTGGAATGTCATCAATTCTAGGTGCTGTAAATTTTATTACAACAGTAATTAATATACGAGCAAATGGAATTTCTTATGATCGAATACCTTTATTTGTATGATCAGTTGTAATTACAGCATTATTATTATTATTATCATTACCAGTTTTAGCCGGGGCTATTACTATATTACTAACTGATCGAAATTTAAATACTTCTTTTTTTGATCCTGCAGGAGGAGGAGACCCTATTTTATACCAACATTTATTT
>IBIDP010-19|Sarcophaga crassipalpis|COI-5P|MN868822
AACTTTATATTTTATCTTCGGAGCTTGAGCAGGAATAGTAGGAACTTCACTAAGAATTCTTATTCGAGCAGAATTAGGTCATCCTGGTGCATTAATTGGAGATGATCAAATTTATAATGTAATTGTTACAGCTCATGCTTTTATTATAATTTTTTTTATAGTAATACCAATTATGATTGGAGGATTTGGAAACTGATTAGTTCCAATTATACTAGGAGCTCCAGATATAGCCTTTCCTCGAATAAATAATATAAGTTTTTGACTTTTACCCCCAGCATTAACATTGCTTCTAGTAAGTAGTATAGTAGAAAATGGAGCTGGAACGGGGTGAACTGTTTACCCTCCTTTATCTTCTAATATTGCTCATGGAGGAGCTTCTGTTGATTTAGCTATTTTTTCTCTACATTTAGCTGGAATTTCTTCAATTTTAGGAGCAGTAAATTTTATTACTACAGTAATTAATATACGATCTACAGGAATTACCTTTGATCGAATACCTTTATTTGTTTGATCAGTAGTAATTACAGCCCTACTTTTACTTTTATCTTTACCGGTACTTGCAGGAGCTATTACTATATTATTAACTGACCGAAATATTAATACCTCTTTTTTCGACCCAGCAGGAGGAGGAGATCCTATTTTATACCAACACCTATTT
>IBIDP012-19|Hermetia illucens|COI-5P|MN868749
TACATTATATTTTATCTTTGGAGCCTGAGCTGGTATAGTGGGAACTTCTTTAAGAATTCTTATTCGAGCCGAATTAGGTCATCCAGGAGCTTTAATTGGAGATGACCAAATTTATAACGTAATTGTTACTGCCCATGCTTTTGTAATAATTTTCTTTATAGTAATGCCAATTATAATTGGTGGATTTGGTAATTGACTTGTTCCCCTAATATTAGGAGCCCCTGATATAGCTTTCCCACGAATAAATAACATAAGTTTCTGGTTACTTCCCCCCTCTCTCACTCTTTTATTAGCCTCTTCTATAGTAGATGCCGGAGCAGGAACCGGTTGAACTGTCTACCCCCCCTTAGCCGCTGGTATTGCTCATAGTGGAGCTTCAGTTGACCTAGCTATTTTTTCCCTTCACTTAGCCGGGATTTCTTCAATTTTAGGGGCTGTAAATTTTATTACAACAGTAATCAATATGCGATCGACAGGAATTACATTTGATCGAATACCTCTATTTGTTTGATCAGTAGTAATTACAGCAGTACTTCTCCTTCTGTCACTTCCTGTTCTTGCTGGAGCTATTACCATATTATTAACAGATCGAAATTTAAATACTTCTTTCTTCGACCCAGCCGGAGGAGGAGATCCCATTCTTTATCAACATTTATTT
>IBIDP017-19|Eristalinus taeniops|COI-5P|MN868800
TACATTATATTTTGTATTTGGAACATGAGCAGGAATAGTAGGTACTTCTTTAAGAGTATTAATTCGAGCTGAATTAGGTCATCCAGGTGCCTTAATTGGAGATGATCAAATTTATAATGTTATTGTTACAGCTCATGCATTTGTAATAATTTTTTTTATAGTTATACCTATTATAATTGGAGGATTTGGAAATTGATTAGTTCCTTTAATATTAGGAGCTCCTGATATAGCATTTCCTCGAATAAATAACATAAGTTTTTGATTATTACCACCTTCTTTAACTTTATTATTAGTAAGAAGTATAGTAGAAAATGGAGCTGGAACTGGATGAACAGTTTACCCTCCTTTATCAAGTAACATTGCCCACGGAGGAGCCTCAGTTGACTTAGCAATTTTTTCTTTACATCTATCTGGTATATCATCAATTTTAGGTGCAGTAAATTTTATTACAACTGTAATTAATATACGTTCAACAGGTATTACATATGATCGAATACCTTTATTCGTTTGATCAGTTGCTATTACAGCTCTTTTACTTTTATTATCACTTCCTGTACTAGCCGGAGCTATTACTATATTATTAACAGATCGAAATTTAAATACTTCTTTTTTTGACCCAGCCGGAGGAGGAGACCCAATTTTATATCAACATTTATTT
>IBIDP022-19|Cylindromyia bicolor|COI-5P|MN868900
AACATTATATTTCATTTTCGGAGCTTGATCAGGAATAGTAGGTACTTCATTAAGAATTTTAATTCGAACTGAATTAGGACATCCTGGAGCTTTAATTGGTGATGATCAAATTTACAATGTAATTGTAACAGCTCATGCTTTTATTATAATTTTTTTTATAGTAATACCAATTATAATCGGAGGATTTGGAAATTGATTAGTACCTTTAATATTAGGAGCACCAGATATAGCATTTCCACGAATAAACAATATAAGATTTTGATTACTTCCTCCAGCATTAATATTATTATTGGCCGGTAGTATAGTAGAAAATGGAGCTGGTACTGGATGAACTGTATACCCTCCATTATCATCAAATATTGCTCATAGAGGAGCTTCTGTTGATTTAACTATTTTTTCCTTACATTTAGCTGGAATTTCATCAATTTTAGGAGCTGTAAATTTTATTACTACAGTTATTAATATACGATCAACAGGAATTACATTTGATCGAATACCTTTATTTGTATGATCAGTTGTAATTACTGCTTTATTACTTCTTTTATCTTTACCAGTTTTAGCTGGAGCTATTACAATATTATTAACAGATCGAAATTTAAATACTTCTTTTTTTGATCCTGCAGGAGGAGGAGATCCTATTCTCTATCAACACTTATTC
>IBIDP024-19|Calliphora vomitoria|COI-5P|MN868782
TACTTTATACTTTATTTTTGGAGCTTGATCAGGAATGATTGGAACTTCATTAAGAATTTTAATTCGAGCTGAACTAGGGCATCCTGGAGCATTAATTGGAGATGATCAAATTTATAATGTAATTGTTACAGCTCATGCTTTTATTATAATTTTTTTTATAGTAATACCAATTATAATTGGAGGGTTTGGAAATTGATTAGTTCCTTTAATATTAGGAGCCCCAGATATAGCATTCCCTCGAATAAATAATATAAGTTTCTGACTTTTACCTCCTGCATTAACTTTACTATTAGTAAGTAGTATAGTAGAAAACGGAGCTGGAACTGGATGAACTGTTTATCCACCTTTATCTTCTAATATTGCACATGGAGGAGCTTCTGTTGATTTAGCTATTTTTTCTTTACATTTAGCAGGAATTTCTTCAATTTTAGGAGCTGTAAATTTTATTACTACAGTTATTAATATACGATCAACAGGTATTACCTTCGACCGAATACCATTATTTGTTTGATCAGTAGTAATTACAGCCTTATTACTTTTATTATCTTTACCAGTATTAGCAGGAGCTATTACTATATTATTAACAGATCGAAATCTTAATACTTCATTCTTTGACCCAGCAGGAGGAGGAGATCCAATTTTATACCAACACTTATTT
>IBIDP026-19|Eristalis tenax|COI-5P|MN868799
TACCTTATATTTTGTATTTGGAACATGAGCAGGTATAGTAGGAACTTCCTTAAGAATTTTAATTCGAGCTGAATTAGGCCATCCTGGAGCATTAATTGGAGATGATCAAATTTATAATGTTATTGTAACAGCTCATGCCTTTGTAATAATTTTCTTTATAGTAATACCTATTATAATTGGAGGATTTGGAAATTGATTAGTTCCTCTTATATTAGGAGCCCCTGATATAGCATTTCCTCGAATAAATAATATAAGTTTCTGATTATTACCTCCTTCTTTAACATTATTATTAGTAAGAAGTATAGTAGAAAATGGAGCTGGAACAGGATGAACTGTATACCCACCTTTATCAAGTAACATTGCACACGGAGGAGCCTCAGTTGATTTAGCAATTTTTTCACTTCATTTATCTGGTATATCATCTATTTTAGGTGCAGTAAATTTCATTACAACTATTATTAATATACGATCAACAGGAATTACATATGATCGAATACCTTTATTTGTATGATCTGTAGGTATTACAGCTTTACTACTACTTCTTTCCCTACCAGTTTTAGCAGGAGCAATTACTATATTATTAACTGATCGAAATTTAAATACATCATTTTTTGATCCAGCAGGAGGAGGTGATCCAATTTTATACCAACATTTATTT
>IBIDP027-19|Eristalis arbustorum|COI-5P|MN868856
AACATTATATTTTGTATTTGGAACATGAGCAGGAATAGTAGGAACCTCATTAAGAATTTTAATTCGAGCTGAATTAGGACATCCTGGAGCATTAATTGGTGATGATCAAATTTATAATGTTATTGTAACAGCTCATGCTTTCGTAATAATTTTCTTTATAGTTATACCTATTATAATTGGAGGATTTGGAAATTGATTAGTTCCTCTTATATTAGGTGCTCCTGATATAGCATTTCCTCGTATAAATAATATAAGTTTCTGATTACTACCTCCTTCTTTAACTCTATTATTAGTAAGAAGTATAGTAGAAAATGGAGCTGGAACAGGATGAACAGTTTATCCACCTTTATCAAGAAATATTGCTCATGGTGGAGCTTCAGTTGATTTAGCTATTTTTTCTTTACATTTATCAGGTATGTCTTCTATTTTAGGAGCAGTAAATTTCATTACAACAGTTATTAATATACGATCTACAGGAATTACATATGATCGAATACCTTTATTTGTATGATCAGTTGCTATTACAGCTTTATTACTTCTTTTATCACTTCCAGTTCTAGCTGGAGCAATTACAATATTATTAACTGATCGAAATTTAAATACCTCTTTTTTTGATCCAGCAGGAGGAGGAGATCCAATTTTATACCAACATTTATTT
>IBIDP029-19|Schoenomyza litorella|COI-5P|MN868756
AACTTTATACTTTATTTTTGGAGCTTGATCCGGAATAGTAGGAACTTCTTTAAGAATTTTAATTCGAGCTGAATTAGGACACCCAGGAGCTTTAATTGGAGATGACCAAATTTATAATGTAATTGTAACTGCTCATGCATTCATTATAATTTTTTTCATAGTAATGCCAATTATAATTGGAGGATTTGGTAATTGACTAGTTCCATTAATACTAGGAGCACCAGATATAGCTTTTCCACGAATAAATAATATAAGTTTTTGATTACTACCTCCAGCATTAACTTTATTATTAGCAAGCAGTATAGTGGAAAACGGAGCTGGAACAGGATGAACAGTATACCCACCTCTGTCATCTAATATTGCTCATGGAGGAGCTTCTGTTGACTTAGCTATTTTTTCTTTACATTTAGCTGGAATTTCTTCAATTTTAGGGGCTGTAAATTTCATTACTACTGTAATTAATATACGATCAACAGGAATTACATTTGATCGAATACCCTTATTTGTTTGATCTGTAGCAATCACAGCTTTACTATTATTACTTTCATTGCCAGTTTTAGCAGGAGCTATTACAATGCTATTAACGGATCGAAATTTAAATACTTCTTTTTTTGACCCAGCAGGAGGAGGAGATCCAATTTTATATCAACATTTATTT
>IBIDP031-19|Milesia crabroniformis|COI-5P|MN868743
AACATTATATTTTTTATTTGGTACATGAGCAGGAATAGTAGGAACTTCTCTAAGAATTTTAATTCGAGCAGAATTAGGTCATCCAGGTGCTTTAATTGGTGATGATCAAATTTATAATACTATTGTAACTGCACATGCTTTCGTAATAATTTTTTTTATAGTTATACCTATTATAATTGGAGGATTTGGAAATTGATTAGTTCCATTAATATTAGGAGCTCCTGATATAGCCTTTCCTCGAATAAATAATATAAGTTTCTGATTACTTCCTCCTTCATTAACTTTACTATTAATAAGTAGATTAGTAGAAAATGGATCAGGAACAGGATGAACAGTTTATCCTCCTCTTTCATCATCAATTGCTCATAGAGGAGCCTCTGTTGATTTAGCTATTTTTTCTCTTCATTTAGCCGGAATATCCTCTATTTTAGGAGCTGTAAATTTTATCACAACAATTATTAATATACGAGCTTCTGGTATTTCTTATGACCGAATACCTTTATTTGTTTGATCTGTAGTAATTACAGCTTTATTACTTTTATTGTCTTTACCTGTATTAGCCGGAGCCATTACAATATTATTAACAGATCGAAATTTAAATACTTCATTTTTTGATCCTGCTGGAGGTGGAGATCCAATTCTATATCAACATTTATTT
>IBIDP033-19|Sphaerophoria scripta|COI-5P|MN868875
AACATTATATTTTCTATTTGGAGCTTGAGCTGGAATAGTAGGAACTTCTTTAAGTATTTTAATTCGTATAGAACTTGGTCATCCAGGAGCATTAATTGGAGATGACCAAATTTATAATGTAATTGTTACGGCACATGCTTTTGTTATAATTTTTTTTATAGTAATACCTATTATAATTGGAGGATTTGGTAATTGATTAGTTCCTTTAATATTAGGAGCTCCTGATATAGCTTTCCCCCGAATAAATAATATAAGTTTCTGATTATTACCTCCTTCTCTAACATTACTTTTAGTAAGTAGTATAGTTGAAAATGGAGCAGGAACTGGATGAACAGTTTATCCACCTCTTTCTGCAAGAATTGCTCATGGTGGAGCTTCTGTAGATTTAGCAATTTTTTCATTACATTTAGCAGGAATATCATCAATTTTAGGGGCTGTAAATTTTATTACAACAGTAATTAATATACGATCAAATGGAATTTCATATGATCGAATACCTTTATTTGTATGATCAGTAGTAATTACTGCTTTATTATTACTTTTATCTTTACCTGTATTAGCAGGAGCAATTACTATACTTTTAACAGATCGAAATTTAAATACATCTTTCTTTGACCCAGCTGGAGGAGGAGACCCAATTTTATATCAACATTTATTT
>IBIDP037-19|Sciapus platypterus|COI-5P|MN868840
GACATTATATTTTATCTTTGGAGCTTGAGCTGGTATAGTAGGGACATCCCTTAGAATTATTGTACGAGCAGAATTAGGCCATCCAGGTTCCCTTATTGGAGATGACCAAATCTATAATGTGGTAGTAACAGCTCATGCATTTATCATAATTTTCTTTATAGTTATACCCATTATAATTGGAGGATTTGGTAACTGACTGGTTCCATTAATGTTAGGAGCCCCTGATATAGCTTTCCCACGAATAAATAATATAAGTTTCTGAATACTACCCCCTTCATTAACACTTCTCTTAGCAAGAAGTATAGTAGAAAACGGAGCAGGAACAGGATGAACTGTTTACCCCCCATTGTCAGCAGGAATCGCGCATGGAGGAGCATCAGTTGATCTGGCTATTTTTTCATTACACCTAGCAGGAATTTCATCAATTTTGGGGGCAGTAAATTTTATTACAACAGTAATTAATATGCGATCAACAGGGATTACTCTTGATCGAATACCTCTATTTGTATGATCAGTTGTTATTACTGCAATTCTTTTATTATTATCCCTCCCAGTTTTAGCAGGAGCAATTACAATACTATTAACAGACCGAAATTTAAATACATCATTCTTTGACCCTGCAGGAGGAGGAGACCCCATTTTATACCAACATTTATTC
>IBIDP039-19|Platycheirus rosarum|COI-5P|MN868851
AACATTATATTTTTTATTTGGAGCTTGAGCTGGTATAGTAGGAACTTCTTTAAGAATTCTTATTCGTGCAGAACTTGGTCATCCAGGAGCATTAATTGGTGATGATCAAATTTATAATGTAATTGTTACTGCTCATGCTTTTGTTATAATTTTTTTTATAGTAATACCAATTATAATTGGAGGATTTGGTAATTGATTAGTACCACTAATACTAGGAGCTCCTGATATAGCATTTCCTCGAATAAATAATATAAGTTTTTGATTATTACCTCCTTCTTTAACACTATTACTAATAAGTAGAATAGTAGAAAATGGAGCTGGAACTGGATGAACAGTATACCCTCCTTTATCTTCAAGAATTGCTCACAGAGGTTCATCAGTTGATTTAGCTATTTTTTCTCTTCATTTAGCTGGAATATCATCAATTTTAGGAGCAGTAAATTTTATTACTACTGTTATTAATATACGATCTAATGGAATTTCATATGACCGAATACCATTATTTGTTTGATCAGTTGTAATTACAGCCTTATTATTACTTTTATCATTACCTGTATTAGCAGGAGCAATTACTATATTATTAACAGACCGAAATTTAAATACATCATTCTTTGATCCTGCTGGAGGAGGAGATCCTATTTTATACCAACATTTATTT
>IBIDP041-19|Scathophaga stercoraria|COI-5P|MN868788
AACATTATACTTTATTTTCGGAGCATGATCCGGAATAATTGGAACTTCTTTAAGTATTCTAATTCGAGCTGAATTAGGACATCCTGGAGCATTAATTGGAGATGATCAAATCTATAATGTAATTGTAACAGCTCATGCTTTTATTATAATTTTTTTTATAGTAATACCAATTATAATTGGAGGATTTGGAAATTGATTAGTGCCTCTTATATTAGGTGCTCCTGATATAGCTTTCCCTCGAATAAATAATATAAGTTTTTGACTTTTACCACCAGCATTAACTTTATTGTTAGTAAGTAGTATAGTAGAAAACGGAGCTGGAACAGGATGAACTGTTTACCCTCCTTTATCTTCAAATATTGCTCATGGAGGAGCTTCTGTTGATTTAGCAATTTTTTCTCTTCATTTAGCAGGAATTTCATCTATTTTAGGAGCTGTAAATTTTATTACAACTGTAATTAATATACGATCAACAGGAATTACTTTTGATCGAATACCTTTATTTGTATGATCTGTAGTAATTACAGCTTTATTACTTTTATTATCTTTACCTGTTTTAGCTGGAGCTATTACTATACTATTAACAGATCGAAATCTTAATACATCATTTTTTGATCCAGCAGGAGGAGGAGACCCAATTCTATACCAACATTTATTT
>IBIDP047-19|Cylindromyia bicolor|COI-5P|MN868894
AACATTATATTTCATTTTCGGAGCTTGATCAGGAATAGTAGGTACTTCATTAAGAATTTTAATTCGAACTGAATTAGGACATCCTGGAGCTTTAATTGGTGATGATCAAATTTACAATGTAATTGTAACAGCTCATGCTTTTATTATAATTTTTTTTATAGTAATACCAATTATAATCGGAGGATTTGGAAATTGATTAGTACCTTTAATATTAGGAGCACCAGATATAGCATTTCCACGAATAAACAATATAAGATTTTGATTACTTCCTCCAGCATTAATATTATTATTGGCCGGTAGTATAGTAGAAAATGGAGCTGGTACTGGATGAACTGTATACCCTCCATTATCATCAAATATTGCTCATAGAGGAGCTTCTGTTGATTTAACTATTTTTTCCTTACATTTAGCTGGAATTTCATCAATTTTAGGAGCTGTAAATTTTATTACTACAGTTATTAATATACGATCAACAGGAATTACATTTGATCGAATACCTTTATTTGTATGATCAGTTGTAATTACTGCTTTATTACTTCTTTTATCTTTACCAGTTTTAGCTGGAGCTATTACAATATTATTAACAGATCGAAATTTAAATACTTCTTTTTTTGATCCTGCAGGAGGAGGAGATCCTATTCTCTATCAACACTTATTC
>IBIDP050-19|Chloromyia formosa|COI-5P|MN868912
AACCCTATATTTTATTTTCGGGGCATGGGCTGGAATAGTAGGTACCTCACTTAGTATACTTGTACGAGCAGAATTAGGTCATCCAGGCGCTTTAATTGGAGATGACCAAATTTATAACGTAATTGTAACAGCTCATGCTTTTGTAATGATTTTTTTTATAGTAATGCCTATTATAATTGGAGGATTTGGTAATTGACTGGTCCCTTTAATATTAGGTGCCCCAGATATAGCATTCCCTCGAATGAATAACATAAGTTTTTGAATACTTCCGCCTTCCCTCACTCTACTTCTTACTTCTTCAATAGTAGACGCCGGAGCTGGAACCGGATGAACTGTTTATCCCCCCTTAGCCTCAGGAATTGCTCATGCGGGCGCATCTGTAGATTTAGCAATTTTTTCATTGCATCTAGCTGGTATTTCATCTATCTTAGGGGCTGTAAATTTTATTACAACAGTAATTAATATGCGATCTGCAGGAATTACCTTTGACCGAATACCCCTATTTGTATGATCTGTGGTAATTACTGCAATTCTATTACTTCTTTCGCTCCCAGTACTAGCCGGAGCTATCACTATATTATTAACCGATCGAAATCTAAACACCTCTTTCTTTGACCCCGCGGGAGGAGGTGACCCCATCTTATATCAACATTTATTT
>IBIDP051-19|Zophomyia temula|COI-5P|MN868806
AACATTATATTTTATTTTCGGAGCTTGATCCGGAATAATTGGGACTTCATTAAGTATCTTAATTCGTACTGAACTAGGACACCCTGGTGCATTAATCGGAAATGATCAAATTTATAATGTTATTGTAACATCTCATGCATTTATCATAATTTTTTTTATAGTAATACCAATTATAATTGGAGGATTTGGAAATTGACTAGTACCATTAATATTAGGAGCCCCAGATATAGCATTTCCTCGAATAAACAATATAAGATTTTGATTACTACCTCCTGCTGTAACATTATTACTAACAAGCAGCATAGTAGAAAATGGAGCTGGTACAGGATGAACTGTTTACCCTCCTTTATCTTCTAATATTGCTCATGGAGGAGCTTCTGTTGACTTGGCAATTTTTTCTCTTCATCTAGCTGGAATTTCTTCTATCTTAGGAGCAGTAAATTTTATTACTACAGTAATTAATATACGATCAACAGGTATTACCTTAGACCGTATACCTTTATTCGTTTGATCAGTAACAATTACAGCTCTTCTTCTTTTATTATCATTACCAGTTCTAGCTGGAGCTATTACAATATTATTAACAGATCGAAATTTAAATACTTCATTTTTTGATCCAGCAGGAGGAGGAGATCCAATTTTATACCAACATTTATTT
>IBIDP054-19|Rivellia syngenesiae|COI-5P|MN868721
AACTTTATATTTTATTTTTGGTGCATGAGCTGGAATAGTAGGTACTTCACTTAGTATTTTAATTCGAGCTGAGCTAGGTCACCCAGGAGCTTTAATTGGTGATGATCAAATTTATAATGTAATTGTTACAGCTCACGCTTTTGTTATGATTTTCTTTATAGTAATACCAATTATAATTGGTGGATTTGGTAATTGACTTGTTCCATTAATATTAGGAGCTCCTGATATAGCTTTCCCACGTATAAATAATATAAGTTTTTGATTATTACCACCTTCTCTTACTCTACTTTTGATGAGTAGTATAGTAGAAAACGGAGCTGGTACAGGTTGAACAGTTTACCCTCCTTTATCTTCAGTTATTGCTCATGGAGGAGCTTCAGTTGATTTAGCTATTTTTAGTTTACATTTAGCAGGAATCTCTTCAATTTTAGGAGCAGTAAACTTTATTACTACAGTAATTAATATACGATCAACAGGAATTTCATTTGATCGAATACCTTTATTTGTATGAGCTGTTGTATTAACAGCATTATTATTACTACTATCTTTACCCGTTCTAGCTGGTGCAATTACTATATTATTAACTGATCGAAATCTTAATACATCCTTTTTTGATCCAGCAGGAGGTGGAGATCCAATTTTATACCAACATTTATTT
>IBIDP055-19|Dilophus febrilis|COI-5P|MN868798
TACCTTATATTTCATTTTTGGGGCATGAGCAGGAATACTGGGAACATCTTTAAGAATATTAATTCGAGCCGAATTAGGCCATCCAGGAGCATTAATTGGGAATGATCAAATTTATAATGTAATTGTAACTGCCCATGCTTTTATTATAATTTTTTTTATAGTAATACCTATTATAATTGGAGGATTCGGTAATTGATTAGTTCCCTTAATACTGGGAGCTCCAGATATAGCTTTTCCTCGTATAAATAATATAAGATTTTGAATACTGCCACCTTCATTAACTTTATTATTAATAAGTAGAATAGTAGAAAATGGAGCAGGAACAGGATGAACAGTTTACCCCCCTTTATCCAGTACACTTTCACATAGAGGAAGGTCTGTGGATTTAGCTATTTTTTCCTTACATTTAGCAGGAATCTCCTCTATTTTAGGAGCTGTTAATTTTATTACTACTGTCATTAATATACGTTCAACAGGTATTTCATTTGATCGTATACCTTTATTTGTATGAGCTGTAGTGATTACAGCTGTCTTATTATTACTTTCTTTACCCGTTTTAGCTGGAGCTATTACAATACTATTAACAGACCGAAATTTAAATACATCATTTTTTGATCCTATGGGAGGAGGAGACCCTATCCTATACCAACACTTATTT
>IBIDP057-19|Syritta pipiens|COI-5P|MN868886
AACTTTATATTTTATATTTGGAACTTGAGCAGGATTAGTAGGAACTTCCTTAAGAATTCTTATTCGAGCCGAATTAGGTCACCCTGGAGCTTTAATTGGAGATGACCAAATTTATAACGTAATTGTTACTGCTCATGCTTTTGTTATAATTTTTTTTATAGTTATACCAATTATAATTGGAGGATTTGGAAATTGACTAGTTCCTTTAATACTGGGAGCACCAGATATAGCATTTCCACGAATAAATAATATAAGTTTTTGACTTTTACCTCCTTCTTTAACTTTATTATTAGTAAGTAGTATAGTAGAAAACGGAGCAGGAACAGGATGAACAGTGTATCCTCCTTTGTCAGCAGGAATTGCTCATAGTGGAGCTTCTGTAGATCTAGCAATCTTTTCTTTACATTTAGCAGGAATATCATCCATTTTAGGAGCTGTAAATTTTATTACAACTGTAATTAACATACGAGCAGCAGGAATAACATATGATCGAATACCTTTATTTGTATGATCAGTAGTTATTACAGCTCTTCTTCTTTTATTATCATTGCCAGTTTTAGCAGGTGCAATTACAATACTTTTAACAGATCGAAATTTAAATACTTCATTTTTCGACCCTGCCGGAGGAGGAGATCCAATTCTTTACCAACATTTATTT
>IBIDP073-19|Eristalis pertinax|COI-5P|MN868885
AACATTATATTTTGTATTTGGAACATGAGCAGGTATAGTAGGAACTTCATTAAGAATTTTAATTCGAGCTGAATTAGGTCATCCCGGAGCATTAATTGGTGATGACCAAATTTATAATGTTATTGTAACAGCTCATGCATTTGTAATAATTTTCTTTATAGTAATACCTATTATAATTGGAGGATTTGGAAATTGATTAGTTCCTCTTATACTTGGAGCTCCTGATATAGCATTTCCTCGAATAAATAATATAAGTTTTTGATTATTACCTCCTTCTTTAACTTTACTATTAGTAAGAAGTATAGTAGAAAATGGAGCTGGAACAGGATGAACAGTTTATCCTCCTTTATCAAGAAATATTGCTCATGGAGGTGCCTCAGTTGATTTAGCAATTTTTTCATTACATTTATCCGGTATATCATCAATTTTAGGGGCTGTAAATTTTATTACAACAGTTATTAATATACGCTCAACAGGAATTACTTATGATCGTATACCTTTATTCGTTTGATCTGTTGCTATTACAGCATTATTACTTCTTCTTTCATTACCAGTTCTAGCCGGAGCAATTACAATATTATTAACTGACCGAAATTTAAATACATCATTTTTTGACCCAGCAGGAGGAGGAGACCCAATTTTATACCAACATCTATTC
>IBIDP074-19|Tachina magnicornis|COI-5P|MN868734
AACTCTATATTTTATTTTCGGTGCATGAGCCGGAATAGTAGGAACATCTTTAAGAATTTTAGTACGAGCTGAATTAGGACATCCAGGTGCACTTATTGGAGATGATCAAATTTATAACGTAATTGTTACAGCTCATGCATTTGTAATAATTTTTTTTATAGTAATACCAATTATAATTGGAGGATTTGGAAATTGATTAGTTCCATTAATATTAGGAGCCCCTGATATAGCTTTCCCTCGAATAAATAATATAAGTTTTTGACTTTTACCACCTGCATTAACATTATTACTTGTAAGTAGTATAGTGGAAAACGGAGCTGGAACAGGATGAACTGTTTATCCACCTTTATCATCTAATATTGCTCATGGAGGAGCTTCTGTTGATTTAGCTATTTTTTCATTACATTTAGCTGGAATTTCTTCAATTTTAGGAGCTGTAAATTTTATTACAACAGTTATTAATATACGATCTACAGGAATTACTTTTGATCGAATACCTTTATTTGTATGATCAGTAGTTATTACAGCATTATTATTACTTTTATCATTACCAGTATTAGCAGGAGCTATTACTATATTATTAACAGATCGAAATTTAAATACATCATTTTTTGATCCTGCAGGAGGAGGAGATCCAATTCTTTACCAACATTTATTT
>IBIDP077-19|Syritta flaviventris|COI-5P|MN868844
TACTTTATATTTTATATTTGGAACATGAGCAGGATTAGTAGGGACATCCCTAAGAATCTTAATTCGAGCAGAATTAGGCCACCCAGGAGCATTAATTGGAGATGACCAAATTTATAATGTAATTGTAACAGCACATGCTTTTGTTATAATTTTTTTTATAGTTATACCAATTATAATTGGAGGATTCGGAAATTGATTAGTTCCTTTAATATTAGGAGCACCTGATATAGCTTTTCCTCGAATAAATAATATAAGTTTTTGACTTTTACCTCCTTCTTTAACATTATTATTAGTAAGAAGCATAGTAGAAAATGGAGCAGGAACTGGATGAACAGTGTATCCTCCCCTATCAGCAGGTATTGCTCATAGTGGGGCATCTGTTGATTTAGCAATTTTCTCCTTACATTTAGCAGGAATATCTTCAATTTTAGGAGCCGTAAATTTTATTACAACAGTTATTAATATACGAGCTGCAGGAATAACATATGATCGAATACCATTATTCGTATGATCTGTTGTGATTACTGCTCTACTTCTTTTACTTTCATTACCAGTATTAGCAGGAGCAATTACTATATTATTAACTGATCGAAATTTAAATACTTCATTCTTTGATCCTGCAGGAGGAGGAGACCCAATTTTATATCAACATTTATTT
>IBIDP078-19|Melanostoma mellinum|COI-5P|MN868839
AACTTTATATTTTTTATTTGGAGCTTGAGCAGGTATAGTAGGAACATCATTAAGTATACTAATTCGTGCTGAACTTGGTCATCCAGGTGCTTTAATTGGAGATGATCAAATTTATAATGTAATTGTTACAGCTCATGCTTTTGTTATAATTTTTTTTATAGTTATACCAATTATAATTGGAGGATTTGGAAATTGATTAGTTCCATTAATATTAGGAGCCCCTGATATAGCATTTCCTCGAATAAATAATATAAGTTTTTGATTACTTCCTCCTTCATTAACTTTATTATTAGTAAGAAGTATAGTAGAAAATGGAGCTGGTACAGGATGAACTGTTTACCCTCCTCTTTCTTCTAGAATTGCTCACGGTGGAGCTTCTGTTGATTTAGCTATTTTTTCTCTTCATTTAGCTGGTATATCTTCAATTCTAGGAGCAGTAAATTTTATTACTACAGTAATTAATATACGTTCTACAGGTATTTCTTATGATCGAATACCATTATTTGTTTGATCAGTTGTAATTACAGCTTTACTTCTTTTATTATCATTACCAGTTCTTGCTGGAGCAATTACAATATTATTAACAGACCGAAATTTAAATACTTCTTTTTTTGATCCAGCCGGAGGAGGAGATCCTATTTTATATCAACATTTATTT
>IBIDP079-19|Chrysops viduatus|COI-5P|MN868882
AACACTTTACTTTATTTTCGGAGCTTGAGCTGGAATAATTGGAACATCTTTAAGTATTTTAATTCGTGCTGAACTAGGTCATCCAGGAGCTTTAATTGGAGATGATCAAATTTATAATGTAATTGTAACTGCTCATGCATTTGTTATAATTTTCTTCATAGTCATACCTATTATAATTGGAGGATTTGGGAATTGATTAGTTCCATTAATATTAGGAGCCCCTGATATAGCCTTTCCTCGAATAAATAATATAAGTTTTTGATTACTGCCTCCTTCATTAACACTTTTATTAGTTAGTAGTATAGTTGAAAATGGGGCTGGAACTGGTTGAACTGTATACCCACCATTATCTGCTGCTATTGCTCATGGAGGTGGATCAGTTGATTTAGCAATTTTCTCTTTACATTTAGCTGGAATTTCATCAATTTTAGGAGCTGTAAATTTTATTACAACAGTAATTAATATACGGTCAACAGGAATCACATTTGACCGAATACCTTTATTTGTTTGAGCTGTAGTAATTACAGCAATTCTTCTTTTATTATCTTTACCAGTTTTAGCTGGAGCTATTACTATACTACTAACAGATCGAAATTTAAATACATCATTCTTTGACCCAGCAGGAGGAGGTGATCCTATTTTATATCAACACTTATTT
>IBIDP080-19|Volucella zonaria|COI-5P|MN868847
AACATTATATTTCTTATTTGGTACTTGAGCAGGTATAGTAGGAACATCTTTAAGTATTTTAATTCGAGCAGAATTAGGACATCCTGGAGCATTAATTGGAGATGATCAAATTTATAATGTAATTGTAACAGCACATGCTTTTGTTATAATTTTTTTTATAGTTATACCAATTATAATTGGAGGATTTGGAAATTGATTAGTTCCATTAATATTAGGTGCACCTGATATAGCATTCCCTCGAATAAATAATTTAAGTTTTTGACTATTACCTCCTTCATTAACATTATTATTAGTAAGTAGTATAGTAGAAAATGGAGCTGGAACAGGTTGAACTGTTTATCCTCCTCTTTCAACAAATATTGCACATGGAGGAGCATCTGTTGATCTAGCAATTTTCTCTCTCCATTTAGCTGGTATATCTTCTATTTTAGGTGCAGTAAATTTTATTACTACAGTAATTAATATACGATCTATTGGAATCACTTATGACCGAATACCTTTATTTGTATGATCTGTAGTAATTACTGCCTTATTATTACTTTTATCACTACCAGTACTAGCAGGAGCTATTACAATATTATTAACTGATCGAAATTTAAATACTTCCTTTTTTGACCCAGCAGGAGGAGGAGATCCAATTTTATATCAACATTTATTT
>IBIDP082-19|Silba fumosa|COI-5P|MN868733
AACTTTATATTTTATCTTCGGGGCTTGAGCAGGAATAGCAGGAACTTCTTTAAGAATTCTAATTCGAGCTGAACTTGGACACCCTGGAGCACTAATTGGAGATGATCAAATTTATAATGTAATTGTAACAGCTCATGCTTTTGTAATAATTTTTTTTATAGTAATACCAATCATAATTGGAGGATTCGGAAATTGATTAGTTCCTCTTATATTAGGAGCTCCTGATATAGCATTTCCTCGAATAAATAATATAAGATTTTGACTATTACCACCTTCTTTAACTTTACTGTTAGTCAGAAGTATAGTGGAAAATGGGGCTGGAACAGGATGAACAGTTTACCCTCCGCTGTCTTCTGTAATTGCTCACGGAGGAGCTTCTGTTGATTTAGCTATTTTTTCTCTTCATTTAGCTGGAGTTTCCTCAATTTTAGGAGCAGTAAATTTTATTACAACAGTAATTAATATACGAGCTACAGGAATTACTTTTGATCGAATACCACTATTTGTTTGATCTGTTGTAATTACAGCTTTACTTTTATTACTTTCTCTTCCAGTTTTAGCAGGAGCTATCACTATATTATTAACAGATCGAAATTTAAATACTTCATTCTTTGACCCCGCTGGAGGAGGAGATCCTATTCTTTACCAACATTTATTC
>IBIDP084-19|Lucilia sericata|COI-5P|MN868737
AACTTTATATTTTATTTTTGGAGCTTGATCCGGAATAATTGGAACTTCTTTAAGAATTCTAATTCGAGCTGAATTAGGACATCCTGGAGCTTTAATTGGAGATGATCAAATTTATAATGTAATTGTTACAGCTCATGCTTTTATTATAATTTTTTTTATAGTAATGCCAATTATAATTGGAGGATTTGGAAATTGATTAGTTCCATTAATACTAGGAGCTCCAGATATAGCATTCCCTCGAATAAATAATATAAGTTTTTGACTTTTACCTCCTGCATTAACTTTATTATTAGTTAGTAGTATAGTAGAAAACGGAGCTGGAACAGGATGAACAGTTTACCCTCCTCTATCTTCTAATATTGCTCATGGAGGAGCTTCTGTTGATTTAGCTATTTTCTCTCTTCATTTAGCAGGAATTTCTTCAATTTTAGGAGCTGTAAATTTTATCACTACAGTTATTAATATACGATCAACAGGAATTACTTTTGATCGAATACCTTTATTTGTTTGATCAGTAGTAATTACAGCTTTATTACTTTTATTATCATTACCAGTATTAGCAGGAGCTATTACAATACTTTTAACAGACCGAAATCTTAATACATCATTCTTTGACCCTGCAGGAGGAGGAGATCCAATTTTATACCAACATTTATTT
>IBIDP085-19|Hecamede albicans|COI-5P|MN868835
AACTTTATATTTTATTTTCGGAGCTTGAGCAGGAATAGTAGGAACATCACTAAGAATTTTAATTCGAGCTGAATTAGGACATCCTGGTGCCTTAATTGGTGATGATCAAATTTACAATGTAATTGTAACTGCACATGCTTTTATTATAATTTTCTTTATAGTTATACCTATTATAATTGGAGGATTTGGAAATTGATTAGTTCCATTAATATTAGGAGCTCCTGATATAGCATTTCCTCGAATAAATAATATAAGTTTCTGATTATTACCCCCAGCTCTTTCACTATTATTAGTAAGAAGTATAGTAGAAAACGGAGCTGGAACAGGATGAACGGTTTACCCACCATTATCAGCAGGAGCTGCACATGGAGGAGCATCAGTTGATCTAGCTATTTTTTCTTTACACTTAGCAGGAATTTCTTCAATTTTAGGAGCTGTAAATTTTATTACAACAGTAATTAATATGCGAGCTACTGGAATTACATTTGATCGAATACCTTTATTTGTTTGATCAGTAGTAATTACTGCATTATTACTACTTTTATCATTACCAGTATTAGCAGGAGCAATTACTATATTATTAACTGATCGAAATTTAAATACTTCATTTTTCGATCCAGCAGGAGGAGGAGACCCAATTTTATACCAACATTTATTT
>IBIDP087-19|Calliphora vicina|COI-5P|MN868803
TACTTTATACTTTATTTTTGGAGCTTGATCGGGAATAATTGGAACTTCATTAAGAATTTTAATTCGAGCCGAACTAGGACATCCTGGAGCATTAATTGGAGATGACCAAATTTATAATGTAATTGTTACAGCTCATGCTTTTATTATAATTTTTTTTATAGTAATACCAATTATAATTGGAGGATTTGGTAATTGATTAGTCCCTTTAATATTAGGAGCTCCAGATATAGCCTTCCCTCGGATAAACAATATAAGTTTCTGACTTTTACCTCCTGCATTAACTTTACTATTAGTAAGTAGTATAGTAGAAAACGGAGCTGGAACAGGATGAACTGTTTACCCACCTTTATCTTCTAATATCGCTCATGGAGGAGCTTCTGTTGATTTAGCTATTTTTTCTTTACACTTAGCAGGAATTTCTTCAATTTTAGGAGCTGTAAATTTTATTACTACAGTTATTAATATACGATCAACAGGAATTACATTCGACCGAATACCATTATTTGTTTGATCTGTAGTAATTACAGCTTTATTACTTTTATTATCTTTACCAGTATTAGCAGGTGCTATTACTATATTATTAACAGATCGAAATCTTAATACATCATTCTTTGACCCAGCAGGAGGAGGAGACCCAATCTTGTACCAACATTTATTT
>IBIDP091-19|Tethina illota|COI-5P|MN868728
AACTTTATATTTTATATTTGGAGCTTGAGCAGGAATAGTAGGAACTTCATTAAGAATTCTAATTCGAGCAGAATTAGGTCATCCAGGAGCTTTAATTGGTGATGATCAAATTTATAATGTAATTGTTACAGCACATGCATTTATTATAATTTTCTTTATAGTAATACCTATTATAATTGGAGGATTTGGAAATTGATTAGTGCCTTTAATATTAGGAGCCCCAGATATAGCATTTCCTCGAATAAATAATATAAGTTTTTGATTATTACCTCCTTCTTTAACCTTATTATTGGTTAGAAGCATAGTAGAAAACGGAGCTGGAACAGGTTGAACAGTTTACCCTCCATTATCTTCTACAATTGCTCATAGTGGAGCATCAGTAGATCTTGCTATTTTTTCTCTTCATTTAGCTGGTATTTCATCAATTTTAGGAGCTGTAAATTTTATTACAACAGTAATTAACATACGATCAACAGGAATTACTTTTGATCGAATACCTTTATTTGTCTGATCTGTAGTAATTACTGCTTTATTATTATTATTATCATTACCTGTTTTAGCAGGAGCTATTACAATATTATTAACAGATCGAAATTTAAATACTTCTTTCTTTGATCCTGCAGGAGGAGGAGACCCAATTTTATATCAACATTTATTT
>IBIDP102-19|Ilione trifaria|COI-5P|MN868855
CACTCTTTATTTCATTTTTGGAGCTTGGGCAGGAATAGTCGGAACTTCTCTTAGTATTCTAATTCGAGCAGAATTAGGTCATCCTGGTGCATTAATTGGAGATGATCAGATTTACAATGTTATTGTAACAGCTCATGCATTTGTTATAATTTTCTTTATAGTTATACCTATTATAATTGGAGGATTTGGTAACTGACTTGTCCCATTAATATTAGGTGCTCCTGATATAGCTTTTCCTCGAATAAATAATATAAGATTCTGATTACTCCCGCCTTCTTTAACCCTTCTCTTAGTGAGCAGCATAGTCGAAAATGGGGCTGGCACTGGTTGAACCGTTTACCCACCGTTATCATCTGTTATCGCCCATGGGGGAGCATCTGTAGACTTAGCTATTTTTAGCTTACATTTAGCTGGAGTATCCTCTATTTTAGGAGCTGTAAACTTTATTACTACTGTTATTAATATACGCTCGACCGGTATTTCATTTGATCGAATGCCTTTATTTGTTTGATCAGTAGCTATTACTGCTCTACTCCTTTTACTGTCTCTCCCTGTATTAGCAGGAGCAATTACCATACTTTTAACGGATCGTAATCTTAACACATCATTTTTTGATCCAGCAGGGGGAGGAGATCCTATTTTATACCAGCATTTATTT
>IBIDP105-19|Frontina laeta|COI-5P|MN868786
AACTTTATATTTTATTTTTGGAGCGTGAGCAAGAATAATTGGAACTTCTTTAAGAATATTAATTCGTATTGAATTAGGTCATCCTGGTTCATTAATTGGAAATGACCAAATTTATAACGTAATTGTAACAGCTCATGCTTTCATTATAATTTTTTTTATAGTAATACCAATTATAATTGGAGGATTTGGAAATTGATTAGTTCCTTTAATACTAGGAGCTCCAGATATAGCTTTCCCCCGAATAAACAATATAAGTTTCTGATTACTTCCCCCTGCTTTAATACTTTTATTAACAAGTAGTATAGTGGAAAATGGGGCCGGAACAGGATGAACAGTTTACCCTCCTTTATCTTCCATTATTGCTCATGGAGGGGCTTCAGTAGATCTAGCAATTTTTTCTCTTCATTTAGCAGGAATTTCCTCAATTTTAGGAGCTGTAAATTTTATTACAACTGTAATTAATATACGAGCTATGGGAATTACATTTGATCGAATACCTTTATTCGTATGATCAGTTATAATTACAGCCTTATTACTTTTATTATCTTTACCAGTATTAGCTGGAGCTATTACTATATTATTAACAGATCGAAATTTAAATACTTCTTTTTTTGACCCCGCGGGAGGAGGAGATCCAATTTTATACCAACATTTATTT
>IBIDP106-19|Hermetia illucens|COI-5P|MN868766
TACATTATATTTTATCTTTGGAGCCTGAGCTGGTATAGTGGGAACTTCTTTAAGAATTCTTATTCGAGCCGAATTAGGTCATCCAGGAGCTTTAATTGGAGATGACCAAATTTATAACGTAATTGTTACTGCCCATGCTTTTGTAATAATTTTCTTTATAGTAATGCCAATTATAATTGGTGGATTTGGTAATTGACTTGTTCCCCTAATATTAGGAGCCCCTGATATAGCTTTCCCACGAATAAATAACATAAGTTTCTGGTTACTTCCCCCCTCTCTCACTCTTTTATTAGCCTCTTCTATAGTAGATGCCGGAGCAGGAACCGGTTGAACTGTCTACCCCCCCTTAGCCGCTGGTATTGCTCATAGTGGAGCTTCAGTTGACCTAGCTATTTTTTCCCTTCACTTAGCCGGGATTTCTTCAATTTTAGGGGCTGTAAATTTTATTACAACAGTAATCAATATGCGATCGACAGGAATTACATTTGATCGAATACCTCTATTTGTTTGATCAGTAGTAATTACAGCAGTACTTCTCCTTCTGTCACTTCCTGTTCTTGCTGGAGCTATTACCATATTATTAACAGATCGAAATTTAAATACTTCTTTCTTCGACCCAGCCGGAGGAGGAGATCCCATTCTTTATCAACATTTATTT
>IBIDP112-19|Lucilia sericata|COI-5P|MN868899
AACTTTATATTTTATTTTTGGAGCTTGATCCGGAATAATTGGAACTTCTTTAAGAATTCTAATTCGAGCTGAATTAGGACATCCTGGAGCTTTAATTGGAGATGATCAAATTTATAATGTAATTGTTACAGCTCATGCTTTTATTATAATTTTTTTTATAGTAATGCCAATTATAATTGGAGGATTTGGAAATTGATTAGTTCCATTAATACTAGGAGCTCCAGATATAGCATTCCCTCGAATAAATAATATAAGTTTTTGACTTTTACCTCCTGCATTAACTTTATTATTAGTTAGTAGTATAGTAGAAAACGGAGCTGGAACAGGATGAACAGTTTACCCTCCTCTATCTTCTAATATTGCTCATGGAGGAGCTTCTGTTGATTTAGCTATTTTCTCTCTTCATTTAGCAGGAATTTCTTCAATTTTAGGAGCTGTAAATTTTATTACTACAGTTATTAATATACGATCAACAGGAATTACTTTTGATCGAATACCTTTATTTGTTTGATCAGTAGTAATTACAGCTTTATTACTTTTATTATCATTACCAGTATTAGCAGGAGCTATTACAATACTTTTAACAGACCGAAATCTTAATACATCATTCTTTGACCCTGCAGGAGGAGGAGATCCAATTTTATACCAACATTTATTT
>IBIDP114-19|Mintho rufiventris|COI-5P|MN868871
TACTTTATATTTTATTTTTGGAGCTTGATCAGGAATAGTAGGAACATCTTTAAGAATTTTAATTCGAACAGAATTAGGACATCCAGGTGCACTAATTGGAGATGATCAAATTTACAATGTTATTGTAACAGCTCATGCTTTCATTATAATTTTTTTTATAGTAATACCTATTATAATTGGTGGATTTGGAAACTGATTAATTCCTTTAATATTAGGTGCTCCAGATATAGCTTTCCCTCGAATAAATAATATAAGTTTTTGATTATTACCTCCTGCTTTAACTTTATTATTAACCAGTAGTATAGTAGAAAATGGAACTGGAACAGGATGAACTGTTTATCCTCCTTTATCTTCTAATATTGCTCATGGAGGAGCTTCTGTTGATTTATCAATTTTTTCTTTACATTTAGCTGGAATTTCATCTATTTTAGGAGCTGTAAATTTTATTACTACAGTAATTAATATACGATCAACAGGAATTACTTTTGACCGAATACCATTATTTGTATGATCTGTAGCAATTACAGCTTTATTACTTTTATTATCATTACCAGTTTTAGCTGGAGCTATTACTATATTATTAACAGATCGAAATTTAAACACTTCTTTTTTTGACCCTGCTGGTGGTGGAGATCCAATTTTATACCAACATTTATTT
>IBIDP115-19|Helina evecta|COI-5P|MN868759
AACTTTATATTTCATCTTTGGAGCTTGATCTGGAATAATTGGAACTTCATTAAGAATTTTAATTCGAACTGAATTAGGACACCCAGGAGCTTTAATTGGAGATGATCAAATTTATAATGTAATTGTAACAGCTCATGCTTTTATTATAATTTTTTTTATAGTAATACCTATTATAATTGGTGGATTTGGAAATTGACTAGTACCCCTAATACTAGGAGCCCCTGATATAGCCTTTCCCCGAATAAATAATATAAGATTTTGACTTTTACCTCCTGCTTTAATTTTATTACTATTTAGTAGAATAGTAGAAAATGGAGCTGGAACAGGATGAACTGTTTACCCTCCTTTATCTTCAAATATTGCTCATAGTGGAGCTTCTGTTGATTTAACTATTTTTTCTTTACATTTAGCTGGAATTTCTTCTATTTTAGGAGCTGTAAATTTTATTACTACTATTATTAATATACGATCAAAAGGAATTTCTTTTGATCGAATACCTTTATTTGTATGATCAGTTGCTATTACAGCTTTATTATTACTTTTATCTTTACCTGTATTAGCTGGAGCTATTACTATATTATTAACAGATCGAAATTTAAATACTTCATTTTTTGACCCTACAGGAGGAGGGGATCCCATTTTATATCAACATTTATTT
>IBIDP121-19|Scaeva pyrastri|COI-5P|MN868807
AACACTATACTTTTTATTTGGAACCTGAGCTGGAATAGTAGGAACTTCATTAAGAGTTTTAATTCGTGCAGAACTTGGACATCCAGGAGCTTTAATTGGAGATGACCAAATTTATAATGTAATTGTTACAGCTCATGCTTTTGTTATAATTTTTTTTATAGTAATACCTATTATAATTGGAGGATTTGGAAATTGATTAGTTCCATTAATATTAGGAGCTCCTGATATAGCATTCCCTCGAATAAATAATATAAGTTTTTGATTATTACCTCCTTCTTTAACATTATTATTAGTAAGAAGAATAGTTGAAAATGGAGCAGGAACTGGTTGAACAGTTTACCCTCCTCTTTCTGCTAGAATTGCTCATGGAGGAGCATCTGTTGATTTAGCTATTTTTTCTCTACATTTAGCTGGTATGTCATCAATTTTAGGAGCAGTAAATTTTATTACTACTGTAATTAATATACGATCAAACGGAATTTCATATGATCGTATACCATTATTTGTATGATCAGTTGTAATTACTGCTTTATTATTACTTTTATCTTTACCTGTATTAGCAGGAGCAATTACAATACTTTTAACTGATCGAAATTTAAATACTTCATTTTTTGATCCTGCAGGAGGAGGAGATCCAATTCTATATCAACATTTATTT
>IBIDP122-19|Eristalis arbustorum|COI-5P|MN868881
AACATTATATTTTGTATTTGGAACATGAGCAGGAATAGTAGGAACCTCATTAAGAATTTTAATTCGAGCTGAATTAGGACATCCTGGAGCATTAATTGGTGATGATCAAATTTATAATGTTATTGTAACAGCTCATGCTTTCGTAATAATTTTCTTTATAGTTATACCTATTATAATTGGAGGATTTGGAAATTGATTAGTTCCTCTTATATTAGGTGCTCCTGATATAGCATTTCCTCGTATAAATAATATAAGTTTCTGATTACTACCTCCTTCTTTAACTCTATTATTAGTAAGAAGTATAGTAGAAAATGGAGCTGGAACAGGATGAACAGTTTATCCACCTTTATCAAGAAATATTGCTCATGGTGGAGCTTCAGTTGATTTAGCTATTTTTTCTTTACATTTATCAGGTATGTCTTCTATTTTAGGAGCAGTAAATTTTATTACAACAGTTATTAATATACGATCTACAGGAATTACATATGATCGAATACCTTTATTTGTATGATCAGTTGCTATTACAGCTTTATTACTTCTTTTATCACTTCCAGTTCTAGCTGGAGCAATTACAATATTATTAACTGATCGAAATTTAAATACCTCTTTTTTTGATCCAGCAGGAGGAGGAGATCCAATTTTATACCAACATTTATTT
>IBIDP123-19|Eristalinus sepulchralis|COI-5P|MN868897
TACATTATATTTTGTATTTGGTACATGAGCAGGAATAGTTGGTACTTCATTAAGAGTATTAATTCGAGCCGAATTAGGTCATCCAGGTGCTTTAATTGGTGATGATCAAATTTATAATGTTATTGTAACAGCTCATGCTTTTGTAATAATTTTCTTTATAGTTATACCTATTATAATTGGAGGATTTGGAAATTGATTAGTTCCTTTAATACTAGGAGCTCCTGATATAGCCTTCCCTCGAATAAATAATATAAGTTTTTGACTATTACCTCCTTCATTAACTTTATTATTAGTAAGTAGTATAGTAGAAAATGGAGCTGGAACTGGATGAACAGTTTATCCTCCATTATCAAGAAATATTGCTCACGGAGGAGCTTCAGTAGATTTAGCAATTTTTTCTTTACATTTATCTGGAATGTCATCAATTTTAGGAGCTGTAAATTTTATTACAACTGTAATTAATATACGTTCCACTGGTATTACTTATGACCGAATACCTTTATTTGTATGATCAGTAGCTATTACAGCTCTTCTATTACTTCTTTCATTACCAGTATTAGCTGGTGCTATTACAATATTATTAACAGACCGAAATTTAAATACATCTTTCTTTGATCCAGCCGGAGGAGGAGACCCAATTTTATATCAACACTTATTC
>IBIDP126-19|Opomyza petrei|COI-5P|MN868717
TACTTTATATTTTATATTTGGAGCTTGAGCAGGAATAGTTGGAACATCTCTAAGAATTCTAATTCGAGCTGAACTTGGACATCCTGGTGCTTTAATTGGAGACGACCAGATTTATAATGTTATTGTAACAGCTCATGCTTTTGTAATAATTTTTTTTATAGTAATACCTATTATAATTGGAGGATTTGGGAATTGACTAGTACCTTTAATATTAGGTGCGCCTGATATAGCTTTTCCTCGAATAAATAATATAAGATTCTGACTACTTCCTCCTTCATTAACACTTTTATTAGTAAGTAGTATAGTTGAAAACGGAGCAGGAACAGGATGAACGGTTTATCCCCCCCTTTCATCAGGAATTGCACATGGAGGAGCTTCTGTAGATTTAGCAATTTTTTCCTTACACCTTGCAGGAATCTCTTCTATTTTAGGAGCTGTAAATTTTATTACCACTGTAATTAATATACGATCAACAGGAATTACATTTGACCGAATACCTTTATTTGTATGATCTGTTGTAATTACAGCTATTTTATTGCTTTTATCTTTACCTGTTTTAGCAGGAGCAATTACTATACTATTAACGGATCGAAACCTAAACACTTCTTTTTTTGACCCTGCAGGTGGAGGAGACCCTATTTTATATCAACACCTATTT
>IBIDP130-19|Musca domestica|COI-5P|MN868797
TACTTTATATTTTATCTTCGGAGCATGATCTGGTATAGTAGGAACATCATTAAGAATTTTAATTCGAGCTGAATTAGGACACCCTGGTGCTCTAATTGGAGACGATCAAATTTATAATGTTATTGTAACAGCTCATGCTTTTATTATAATTTTCTTTATAGTAATACCTATTATAATTGGAGGGTTTGGAAATTGATTAGTTCCTTTAATATTAGGAGCTCCAGATATAGCATTCCCTCGAATGAATAATATAAGTTTTTGATTATTACCTCCTGCATTAACTCTATTATTAGTAAGAAGTATAGTAGAAAAGGGAGCTGGAACAGGTTGAACTGTTTATCCACCTTTATCATCAATTATTGCTCATGGTGGAGCTTCAGTTGATTTAGCTATTTTCTCTCTTCACTTAGCAGGAATTTCTTCAATTTTAGGAGCAGTAAATTTTATTACAACTGTTATTAACATACGATCAACAGGAATTACATTCGATCGAATGCCTTTATTTGTTTGATCAGTTGTAATTACTGCATTATTATTATTATTATCTCTTCCTGTTCTTGCTGGAGCTATTACTATACTATTAACTGATCGAAATTTAAATACTTCATTCTTTGACCCAGCTGGAGGAGGTGATCCAATTCTTTACCAACACTTATTC
>IBIDP134-19|Muscina stabulans|COI-5P|MN868836
TACTTTATATTTTATTTTTGGAGCTTGATCAGGAATAGTAGGAACTTCCCTAAGTATCCTAGTACGAACTGAATTAGGACATCCTGGTGCTTTAATTGGGGATGACCAAATTTATAACGTAATTGTAACAGCCCATGCTTTTATTATAATTTTTTTCATAGTAATGCCTATTATAATTGGAGGATTTGGAAATTGATTAGTCCCTTTAATATTAGGAGCACCAGATATAGCATTCCCCCGAATAAATAATATAAGTTTTTGACTTTTACCTCCCGCATTAACATTATTACTTGTAAGTAGTATAGTTGAAAAGGGAGCTGGAACTGGTTGAACCGTTTACCCTCCTTTATCTTCTAATATTGCTCATGGAGGAGCTTCTGTAGATTTAGCTATTTTTTCTTTACATTTAGCAGGAATTTCTTCAATTTTAGGAGCTGTAAATTTTATTACAACCGTAATTAATATACGATCCACAGGTATTTCATTTGATCGTATACCCTTATTTGTTTGATCAGTAGTAATTACAGCATTATTACTTCTTTTATCCTTACCTGTTTTAGCTGGAGCTATTACAATATTATTAACAGATCGTAATTTAAATACTTCATTCTTTGACCCCGCAGGAGGAGGAGATCCAATTCTTTACCAACATTTATTT
>IBIDP136-19|Hydrotaea dentipes|COI-5P|MN868754
AACATTGTATTTCATTTTTGGAGCATGATCAGGAATAGTGGGAACCTCTTTAAGAATTTTAATTCGAGCTGAATTAGGTCATCCTGGTGCATTAATTGGTAATGATCAAATTTATAATGTAATTGTAACAGCTCATGCTTTTATTATAATTTTTTTTATAGTTATACCTATTATAATTGGAGGATTTGGAAATTGATTAGTTCCTTTAATATTAGGAGCTCCTGATATAGCTTTCCCTCGAATAAATAACATAAGCTTTTGACTTCTACCTCCTGCTTTAACTTTACTTTTAGTAAGCAGAATAGTTGAAAATGGAGCTGGTACAGGTTGAACTGTCTACCCCCCTTTATCATCTAATATTGCTCATGGAGGCGCTTCTGTTGATTTAGCTATTTTTTCATTACATTTAGCAGGAATTTCTTCAATTTTAGGAGCCGTAAATTTTATTACTACTGTAATTAATATACGTTCAACTGGAATTACTTTTGATCGAATACCTTTATTTGTTTGATCCGTAGTAATTACAGCTCTTTTATTATTACTATCTCTACCAGTTTTAGCTGGAGCAATTACTATACTATTAACAGATCGAAATTTAAATACTTCTTTTTTTGATCCTGCAGGAGGAGGAGATCCTATTTTATATCAACATTTATTT
>IBIDP140-19|Ceratitis capitata|COI-5P|MN868854
AACTTTATATTTTATTTTTGGAGCATGAGCTGGAATAGTAGGAACATCCTTAAGAATTTTAATTCGAGCTGAATTAGGACATCCAGGAGCATTAATTGGAGATGATCAAATTTATAATGTAATTGTTACTGCCCATGCTTTTGTAATAATTTTTTTCATAGTTATACCTATTATAATTGGAGGATTTGGTAATTGATTAGTACCTTTAATACTTGGAGCACCAGATATAGCATTTCCTCGAATAAATAATATAAGTTTTTGATTATTACCTCCTTCCCTTACATTATTATTAGTAAGTAGTATAGTAGAAAATGGAGCTGGAACAGGTTGAACAGTTTACCCTCCTCTTTCTTCTGTGATTGCTCATGGAGGTGCTTCTGTTGACTTAGCAATTTTTTCTCTTCATTTAGCTGGAATTTCTTCTATTTTAGGGGCTGTAAATTTTATCACAACAGTAATTAATATACGATCTACCGGAATTTCATTCGACCGAATACCTTTATTTGTTTGAGCAGTAGTTCTTACTGCACTACTTCTATTATTATCTTTACCAGTTTTAGCAGGAGCTATTACTATATTATTAACAGATCGAAATTTAAATACTTCATTCTTTGACCCAGCTGGAGGAGGAGACCCTATTTTATACCAACATTTATTT
>IBIDP141-19|Compsilura concinnata|COI-5P|MN868741
AACTTTATATTTTATTTTTGGAGCATGATCAGGAATAATTGGTACTTCCTTAAGAATTTTGATTCGTACTGAATTAGGTCATTCTGGTTCTTTAATTGGAAATGATCAAATTTATAATGTAATTGTTACAGCTCATGCTTTTGTAATAATTTTTTTTATAGTAATACCTATTATAATTGGAGGATTTGGAAATTGATTAGTTCCATTAATATTAGGAGCTCCAGATATAGCTTTTCCACGAATAAATAATATAAGTTTTTGATTACTTCCTCCTGCTTTAATTCTTTTATCTTCGAGAGGAATAATAGATAATGGAGCTGGTACTGGTTGAACTGTTTATCCTCCTTTATCTTCTCTTATTTCTCATGATGGATCTTCTGTAGATTTAGCAATTTTTTCTCTTCATTTAGCAGGAATTTCTTCTATTTTAGGTGCAGTAAATTTTATTACTACAGTAATTAATATACGATCAACAGGAATTACATTTGATCGTATACCTTTGTTTGTTTGATCTGTTGTAATTACAGCTTTATTATTATTATTATCTTTACCAGTTTTAGCAGGAGCAATTACTATATTATTAACAGATCGAAATTTAAATACTTCTTTTTTTGATCCTGCTGGAGGAGGAGATCCTATTTTATACCAACATTTATTT
>IBIDP146-19|Euthycera alaris|COI-5P|MN868820
GACACTGTATTTCATTTTTGGTGCGTGAGCAGGAATAGTAGGAACATCCTTGAGAATTTTAATTCGAGCTGAACTCGGTCATCCAGGTGCTTTAATTGGTGATGATCAAATTTACAATGTAATTGTCACAGCTCATGCATTTGTCATAATTTTTTTTATAGTTATACCTGTTATAATTGGAGGATTTGGAAATTGACTAGTACCCCTAATACTAGGAGCCCCAGATATAGCCTTTCCTCGAATGAATAACATAAGCTTTTGACTTCTTCCTCCCTCCTTATCTCTTCTGTTAGTCAGTAGAATAGTTGAAAACGGAGCTGGAACTGGATGAACTGTGTACCCTCCCTTGTCTTCTGTAATTGCTCACAGTGGTGCTTCAGTAGATTTAGCAATTTTTAGACTTCATCTTGCAGGAGTTTCATCGATTTTAGGAGCTGTAAATTTTATTACTACAGTTATTAACATACGATCAGCCGGGATTTCATTTGATCGAATACCCTTATTTGTTTGATCAGTTGCAATTACTGCACTTCTTCTTCTTCTTTCTCTTCCTGTTTTAGCAGGAGCCATCACTATACTTTTAACTGACCGAAATTTAAATTCTTCATTTTTTGATCCAGCAGGAGGGGGAGATCCTGTCTTGTATCAACACTTATTT
>IBIDP147-19|Gymnopternus cupreus|COI-5P|MN868893
AACACTATATTTTATTTTCGGGGCTTGAGCAGGAATAGTAGGGACATCTCTTAGTATTATTGTTCGAGCAGAATTAGGTCATCCAGGTGCATTGATTGGAGATGATCAAATTTATAATGTAGTAGTTACAGCCCATGCATTTGTTATAATTTTCTTTATAGTAATACCAATTATAATTGGAGGGTTTGGAAATTGATTAGTACCCCTAATATTAGGGGCCCCTGATATAGCCTTCCCACGAATAAATAATATAAGATTTTGAATATTACCCCCATCATTAACACTATTATTAGCTAGTAGTATAGTAGAAAGTGGGGCTGGGACAGGTTGAACAGTTTATCCACCATTATCAGCAGGAATTGCTCATGGAGGGGCATCTGTCGATTTAGCAATTTTTTCTCTTCATTTAGCAGGTATTTCCTCAATTCTAGGAGCAGTAAATTTTATTACTACAGTAATTAATATACGGTCAACAGGAATTACTTTTGACCGTATACCTTTATTTGTATGATCTGTAGTAATTACTGCTATTTTATTATTGTTATCACTACCAGTACTTGCTGGAGCAATTACTATACTTTTAACAGATCGAAATTTAAATACTTCATTTTTTGACCCAGCCGGAGGAGGAGACCCTATTCTATACCAACATCTATTT
>IBIDP150-19|Prosopomyia pallida|COI-5P|MN868785
AACATTATACTTTTTATTTGGGGCATGAGCTGGAATAGTAGGTACTTCCTTAAGAATTTTAATTCGTGCTGAATTAGGTCACCCTGGAGCATTAATTGGAGATGATCAAATCTACAATGTAATCGTTACAGCCCATGCATTTGTAATAATTTTCTTTATAGTTATACCTATTATAATTGGAGGATTTGGAAATTGATTAGTCCCTCTTATACTAGGAGCACCAGATATGGCATTTCCCCGAATAAATAACATAAGTTTCTGACTTCTTCCGCCCTCATTAACTCTTTTATTAGTTAGAAGAATAGTCGAAAACGGAGCAGGAACAGGCTGAACGGTTTACCCCCCACTTTCATCAGGAATCGCTCATGGGGGAGCCTCAGTGGATTTAGCAATTTTTAGTCTTCATCTTGCAGGAATTTCATCTATTTTAGGCGCAGTTAATTTTATTACCACTGTAATTAACATACGATCTACAGGAATTACTTTTGATCGAATACCTTTATTTGTTTGATCAGTAGCTATTACTGCTTTATTATTACTTCTTTCTTTACCTGTTCTTGCCGGTGCAATTACAATATTATTAACAGACCGGAATCTAAATACCTCGTTTTTTGACCCCGCTGGAGGAGGAGATCCTATTTTATACCAACATTTATTT
>IBIDP155-19|Lispe kowarzi|COI-5P|MN868745
AACTTTATATTTTATTTTTGGTATTTGATCAGGAATACTAGGAACTTCTTTTAGAATTCTAATTCGAACCGAATTAGGTCACCCAGGAACATTAATTGGAAATGATCAAATTTATAATGTTGTAGTAACAGCTCATGCATTTATTATAATTTTTTTTATAGTAATACCTATTATAATTGGAGGATTCGGAAATTGACTAGTTCCTTTAATATTAGGAGCTCCAGATATAGCTTTTCCCCGAATAAATAATATAAGATTTTGATTATTACCTCCTGCACTAATACTTTTATTAAGAAGCTCTATAATCGATAGCGGATCAGGTACAGGATGAACTGTTTACCCACCCCTCTCATCTAATATTGCTCATAGTGGGCCTTCTGTTGATTTAACAATTTTTTCATTACATCTTGCCGGAATTTCTTCAATTTTAGGTGCTGTAAACTTCATTACTACTGTAATAAATATACGAGCAAATGGAATAACTTTTGATCGAATACCTTTATTTGTTTGATCTGTATTAATTACAGCATTATTATTATTATTATCTTTACCTGTCTTAGCAGGAGCAATTACAATATTGTTAACTGATCGAAATTTTAATACTTCATTTTTTGATCCTGCCGGAGGAGGAGATCCTATTCTTTATCAACATTTATTT
>IBIDP156-19|Rhyncomya columbina|COI-5P|MN868846
TACTTTATATTTCATTTTTGGAGCATGATCCGGAATAGTAGGAACATCATTAAGAATTTTAATTCGAGCTGAATTAGGTCATCCTGGAGCTTTAATTGGAGATGATCAAATTTATAATGTAATTGTAACAGCCCATGCCTTCGTAATAATTTTTTTTATAGTAATACCAATTATAATTGGAGGATTTGGAAATTGATTAGTCCCTTTAATATTAGGAGCCCCAGATATAGCATTTCCTCGAATAAACAATATAAGTTTTTGATTACTACCTCCTGCATTAACTTTATTACTAGTAAGCAGTATAGTAGAAAACGGAGCTGGAACAGGATGAACTGTTTATCCTCCTTTATCATCTAATATTGCTCATGGAGGAGCTTCTGTTGACTTAGCTATTTTTTCATTACATTTAGCAGGAATTTCTTCAATTTTAGGAGCTGTAAATTTTATTACAACTGTAATTAATATACGATCAACAGGAATTACATTTGATCGAATACCATTATTTGTATGATCAGTAGTAATTACAGCTTTATTACTACTTTTATCATTGCCAGTATTAGCAGGAGCTATTACTATATTATTAACTGATCGAAATTTAAATACTTCATTTTTTGATCCAGCAGGAGGAGGAGATCCAATTTTATACCAACATTTATTT
>IBIDP159-19|Eutropha albipilosa|COI-5P|MN868876
AACATTATATTTTATATTCGGAGCATGAGCTGGAATAGTAGGAACATCTTTAAGAATTTTAATTCGAGCTGAATTAGGACATCCAGGTGCATTAATTGGAGATGACCAAATTTATAACGTTATTGTAACTGCACATGCTTTTGTAATAATTTTCTTTATAGTTATACCAATTATAATTGGTGGATTTGGAAATTGATTAGTCCCATTAATATTAGGAGCTCCTGATATAGCATTTCCTCGAATAAATAATATAAGTTTTTGATTACTACCACCTTCTTTAACTTTATTAATAGCAAGAAGAATGGTTGAAAATGGGGCTGGTACAGGATGAACTGTTTACCCTCCATTATCATCAATTATTGCTCATGGTGGTGCATCAGTAGATTTAGCAATTTTTTCTCTTCATCTTGCAGGAATTTCATCAATTTTAGGAGCAGTAAATTTTATTACTACAGTAATTAATATACGATCTACAGGAATTACATTTGATCGAATACCTTTATTTGTTTGATCAGTTGTAATTACAGCTTTATTATTACTTTTATCTTTACCTGTACTAGCTGGAGCTATTACAATATTATTAACAGACCGAAATTTAAACACCTCATTTTTTGATCCAGCTGGAGGAGGAGATCCAATTTTATACCAACATTTATTT
>IBIDP167-19|Calliphora vicina|COI-5P|MN868827
TACTTTATACTTTATTTTTGGAGCTTGATCGGGAATAATTGGAACTTCACTAAGAATTCTAATTCGAGCCGAACTAGGACATCCTGGAGCATTAATTGGAGATGATCAAATTTATAATGTAATTGTTACAGCTCATGCTTTTATTATAATTTTTTTTATAGTAATACCAATTATAATTGGAGGATTTGGTAATTGATTAGTTCCTTTAATATTAGGAGCTCCAGATATAGCCTTCCCTCGGATAAACAATATAAGTTTCTGACTTTTACCTCCTGCATTAACTTTACTATTAGTAAGTAGTATAGTAGAAAACGGAGCTGGAACAGGATGAACTGTTTACCCACCTTTATCTTCTAATATCGCTCATGGAGGAGCTTCTGTTGATTTAGCTATTTTTTCTTTACACTTAGCAGGAATTTCTTCAATTTTAGGAGCTGTAAATTTTATTACTACAGTTATTAATATACGATCAACAGGAATTACATTCGACCGAATACCATTATTTGTTTGATCTGTAGTAATTACAGCTTTATTACTTTTATTATCTTTACCAGTATTAGCAGGTGCTATTACTATATTATTAACAGATCGAAACCTTAATACATCATTCTTTGATCCAGCAGGAGGAGGAGACCCAATCTTGTACCAACATTTATTT
>IBIDP173-19|Hybos culiciformis|COI-5P|MN868715
AACACTATATTTTATTTTCGGGGCATGATCAGGGATAGTAGGAACGTCTCTAAGAATTCTAGTACGAGCTGAATTAGGCCATCCAGGAGCATTAATTGGAGATGATCAAATTTATAATGTAATTGTAACAGCTCATGCTTTTGTAATAATTTTTTTTATAGTAATACCTATTATAATTGGAGGGTTTGGTAATTGATTAGTACCATTAATATTAGGAGCCCCTGATATAGCTTTCCCTCGAATAAATAACATAAGTTTTTGAATATTACCTCCCTCACTAACTCTTCTTTTAGCAAGTAGTATAGTAGAAAACGGAGCTGGAACAGGATGAACAGTTTACCCCCCACTATCTGCAGGAATCGCACATGGTGGGGCATCTGTTGATCTAGCAATTTTTTCTCTACATTTAGCAGGAATTTCCTCAATTTTAGGCGCAGTTAATTTTATTACTACAGTAATTAATATACGATCGCCTGGAATTTCATTTGATCGTATACCTCTATTTGTTTGATCAGTAGTTATTACAGCAATTCTTTTACTTTTATCGCTTCCTGTTTTAGCTGGAGCTATCACAATATTATTAACTGACCGAAATTTAAATACATCTTTCTTTGACCCCGCAGGAGGAGGAGACCCTATTTTATACCAACACTTATTT
>IBIDP175-19|Lasiochaeta pubescens|COI-5P|MN868814
AACATTATATTTTATATTTGGAGCTTGAGCTGGAATAGTAGGAACTTCATTAAGAATTCTAATTCGAGCTGAATTAGGTCATCCTGGAGCTTTAATTGGTGATGATCAAATTTATAATGTAATTGTTACTGCTCATGCTTTTGTAATAATTTTTTTTATAGTAATACCAATTATAATTGGAGGTTTTGGAAATTGATTAGTTCCATTAATATTAGGAGCACCAGATATAGCTTTTCCTCGAATAAATAATATAAGTTTTTGATTATTACCCCCATCTTTAACTCTATTAATAGCAAGTAGTATAGTAGAAAATGGAGCTGGAACAGGATGAACAGTTTATCCACCTTTATCATCTATTATTGCTCACGGAGGAGCTTCTGTTGATTTAGCTATTTTTTCATTACATTTAGCTGGAGTTTCATCAATTTTAGGAGCAGTAAATTTTATTACTACAGTAATTAATATACGATCAACAGGAATCACATTTGATCGAATACCATTATTTGTTTGATCAGTAGTAATTACAGCTCTTCTTCTTCTTTTATCATTACCTGTTTTAGCTGGAGCTATTACTATACTATTAACAGATCGAAATTTAAATACTTCATTCTTTGATCCAGCAGGAGGAGGAGATCCTATTTTATACCAACATTTATTT
>IBIDP178-19|Dasyphora albofasciata|COI-5P|MN868891
TACATTATATTTTATCTTTGGTGCATGATCCGGAATAATCGGAACTTCTTTAAGAATTTTAATTCGAGCAGAATTAGGACATCCTGGTGCTTTAATTGGTGATGATCAAATTTATAATGTAATTGTTACAGCTCATGCTTTTATTATAATTTTCTTCATAGTTATACCTATTATAATTGGAGGATTTGGAAACTGATTAGTTCCTTTAATATTAGGAGCTCCTGATATAGCCTTTCCTCGAATAAATAATATAAGTTTTTGACTTTTACCTCCTGCTTTAACGCTTCTCCTTGTAAGTAGTATAGTAGAAAAGGGAGCTGGTACAGGTTGAACTGTTTACCCACCTTTATCCTCTAATATTGCCCATGGAGGAGCTTCAGTTGATTTAGCTATCTTTTCTTTACATTTAGCTGGAATTTCATCAATTTTAGGTGCCGTAAATTTTATTACTACTGTTATTAATATACGATCTACAGGAATTACATTTGATCGAATACCTTTATTTGTTTGATCTGTAGTAATTACAGCTTTATTATTACTTTTATCATTACCAGTTTTAGCTGGAGCTATTACTATACTTTTAACAGATCGAAATATAAATACTTCTTTCTTTGATCCTGCCGGAGGGGGAGATCCAATTCTTTATCAACATTTATTT
>IBIDP179-19|Machaerium maritimae|COI-5P|MN868714
GACTTTATACTTTATTTTCGGAGCTTGAGCAGGAATAGTAGGTACTTCTTTAAGAATTATTATTCGAGCTGAACTTGGACATCCAGGTGCATTAATTGGGGATGATCAAATTTATAATGTAATTGTAACTGCTCATGCTTTTATTATAATTTTCTTTATAGTTATACCTATTATAATTGGGGGATTCGGAAATTGACTTGTTCCTTTAATATTAGGAGCTCCTGATATAGCTTTTCCACGAATAAATAATATAAGTTTTTGAATACTTCCCCCTTCTTTAACTCTTCTTTTAGCTAGAAGAATAGTAGAAAACGGAGCTGGAACTGGTTGAACAGTTTATCCTCCTTTATCGGCAGGAATTGCTCACGGAGGAGCTTCAGTTGATTTAGCTATTTTCTCCCTTCATTTAGCTGGTATTTCATCTATTTTAGGGGCCGTAAATTTTATCACTACAGTAATTAATATACGATCAACGGGAATTTCTTTTGATCGAATACCTTTATTCGTTTGATCCGTTGTAATTACTGCAATTTTACTTCTTCTTTCTTTACCAGTATTAGCCGGAGCTATTACTATACTTTTAACAGATCGAAATTTAAATACATCATTTTTTGACCCAGCTGGAGGAGGAGACCCTATTTTATACCAACACTTATTC
>IBIDP180-19|Nemoraea pellucida|COI-5P|MN868742
AACTTTATATTTTATTTTCGGAGCATGATCAGGAATAGTAGGAACTTCTTTAAGAATACTAATTCGAACTGAATTAGGACATCCTGGTGCATTAATTGGTGATGATCAAATTTATAATGTAATTGTAACAGCTCACGCATTTGTTATAATTTTTTTTATAGTTATACCAATTATAATTGGAGGATTTGGAAATTGATTAGTTCCATTAATACTAGGAGCCCCAGATATAGCTTTCCCACGAATAAATAATATAAGTTTTTGATTACTACCTCCCGCTTTAACTTTATTATTAACAAGTAGCATAGTTGAAAACGGAGCTGGTACAGGATGAACTGTTTACCCTCCTTTGTCTTCTAATATTGCCCATGGAGGAGCATCTGTTGATTTAGCTATTTTTTCTTTACATTTAGCCGGAATTTCTTCAATTTTAGGAGCTGTAAATTTTATTACTACAGTAATTAATATACGAGCTGTAGGAATCACTTTTGATCGAATACCTTTATTTGTTTGATCTGTAGTAATTACAGCTTTATTATTACTTTTATCATTACCAGTTTTAGCAGGAGCTATTACAATATTATTAACTGATCGAAATTTAAATACTTCATTTTTTGATCCTGCTGGAGGAGGAGATCCTATTCTTTATCAACATTTATTT
>IBIDP183-19|Pherbina mediterranea|COI-5P|MN868861
AACCCTTTATTTTGTTTTTGGTGCATGGGCCGGAATAGTAGGAACCTCCCTAAGAATTCTTATCCGAGCAGAACTTGGTCATCCAGGTGCATTAATTGGAGATGACCAAATTTATAATGTAATTGTTACAGCTCATGCCTTTGTAATAATTTTTTTTATAGTAATACCTATCATAATTGGAGGATTTGGAAACTGGCTAGTACCCCTAATGCTAGGAGCCCCAGATATAGCCTTTCCACGAATAAACAATATAAGCTTTTGACTTTTACCCCCTTCCTTGACCCTTCTCTTAGTTAGTAGATTAGTTGAAAACGGAGCTGGCACTGGATGAACGGTGTATCCCCCACTTTCATCAGTCATTGCTCATGGAGGGGCATCTGTTGACTTAGCAATTTTTAGACTTCATTTAGCAGGAGTTTCATCAATTTTAGGAGCTGTTAATTTTATTACCACAGTGATTAATATACGATCTGTTGGAATTACATTTGATCGAATACCTCTGTTTGTATGATCAGTAGCAATTACAGCTCTTTTACTACTTCTTTCATTACCTGTATTAGCTGGAGCTATTACTATGTTGCTGACTGATCGAAACTTGAACACTTCGTTCTTTGATCCTGCTGGAGGAGGAGATCCCATTTTATACCAACATTTATTT
>IBIDP372-19|Fannia lustrator|COI-5P|MN868758
AACTTTATATTTTATTTTCGGTGCTTGATCTGGTATAGTAGGCACTTCTTTAAGTATTTTAATTCGAGCTGAATTAGGACACCCAGGAGCATTAATTGGAGACGACCAAATTTATAACGTTATTGTAACAGCCCATGCTTTTATTATAATTTTTTTTATGGTAATACCAATTATAATTGGAGGATTTGGTAACTGACTAGTTCCTTTAATATTAGGAGCTCCTGATATAGCTTTCCCTCGAATAAATAATATAAGTTTTTGATTACTTCCACCAGCATTAACCTTACTTCTAGTAAGTTCTATAGTAGAAAATGGAGCTGGTACAGGATGAACTGTTTACCCCCCACTTTCATCTAACATTGCTCATAGAGGAGCTTCAGTTGACTTAGCAATTTTCTCCTTACATTTAGCTGGAATTTCCTCTATTTTAGGAGCTGTAAATTTTATTACTACTGTAATTAATATACGATCTACTGGAATTACATTAGATCGTATACCTTTATTTGTTTGATCAGTAGTAATTACAGCTTTATTGCTACTTTTATCTCTACCTGTTTTAGCTGGAGCTATTACTATATTATTAACAGATCGAAATCTAAATACTTCTTTTTTTGATCCTGCAGGAGGAGGGGACCCTATTTTATACCAACATTTATTT
>IBIDP381-19|Calliphora vomitoria|COI-5P|MN868853
TACTTTATACTTTATTTTTGGAGCTTGATCAGGAATGATTGGAACTTCATTAAGAATTTTAATTCGAGCTGAACTAGGGCATCCTGGAGCATTAATTGGAGATGATCAAATTTATAATGTAATTGTTACAGCTCATGCTTTTATTATAATTTTTTTTATAGTAATACCAATTATAATTGGAGGGTTTGGAAATTGATTAGTTCCTTTAATATTAGGAGCCCCAGATATAGCATTCCCTCGAATAAATAATATAAGTTTCTGACTTTTACCTCCTGCATTAACTTTACTATTAGTAAGTAGTATAGTAGAAAACGGAGCTGGAACTGGATGAACTGTTTATCCACCTTTATCTTCTAATATTGCACATGGAGGAGCTTCTGTTGATTTAGCTATTTTTTCTTTACATTTAGCAGGAATTTCTTCAATTTTAGGAGCTGTAAATTTTATTACTACAGTTATTAATATACGATCAACAGGTATTACCTTCGACCGAATACCATTATTTGTTTGATCAGTAGTAATTACAGCCTTATTACTTTTATTATCTTTACCAGTATTAGCAGGAGCTATTACTATATTATTAACAGATCGAAATCTTAATACTTCATTCTTTGACCCAGCAGGAGGAGGAGATCCAATTTTATACCAACACTTATTT
>IBIDP387-19|Campsicnemus umbripennis|COI-5P|MN868739
AACTTTATATTTTATCTTCGGAGCATGATCTGGAATAGTAGGTACTTCTTTAAGTATTATTATTCGAGCTGAATTAGGTCATCCAGGTGCTTTAATTGGAGATGATCAAATTTATAATGTAATTGTTACTGCTCATGCTTTTATTATAATTTTTTTTATAGTTATGCCAATTATAATTGGAGGGTTTGGTAATTGACTTGTACCTTTAATATTAGGAGCCCCTGATATAGCCTTTCCTCGAATAAATAATATAAGTTTTTGAATATTACCTCCTTCAATTACTCTTTTATTAGCTAGAAGAATAGTAGAAAACGGAGCTGGAACAGGATGAACTGTTTATCCTCCCTTATCTGCAGGAATTGCTCATGGAGGAGCTTCTGTTGATTTAGCAATTTTTTCTCTTCATCTTGCTGGAATTTCTTCTATTCTAGGAGCTGTAAATTTTATTACAACAGTTATTAATATACGATCAACAGGAATTACTTTTGATCGAATACCTCTATTTGTTTGATCTGTTGTTATTACTGCTATTTTATTATTACTTTCATTACCTGTTTTAGCTGGGGCTATTACTATATTATTAACTGATCGAAATCTTAATACATCATTTTTTGACCCAGCCGGAGGAGGAGATCCTATTTTATACCAACACTTATTT
>IBIDP388-19|Norellia tipularia|COI-5P|MN868870
TACATTATATTTTATTTTCGGAGCATGATCCGGAATAGTAGGAACTTCTTTAAGTATATTAATTCGAGCTGAATTAGGACATCCTGGAGCATTAATTGGAGATGATCAAATTTACAATGTAATTGTAACAGCCCATGCTTTTGTAATAATTTTTTTTATAGTAATACCTATTATAATTGGAGGATTTGGAAATTGATTAGTACCACTTATATTAGGTGCTCCTGATATAGCTTTTCCTCGAATAAATAATATAAGTTTTTGACTTCTACCTCCAGCATTAACTTTACTATTAGTAAGTAGTATAGTAGAAAACGGAGCTGGTACAGGATGAACTGTTTACCCTCCTTTATCTTCAAATATCGCTCATGGAGGAGCTTCTGTTGATTTAGCAATTTTTTCTCTTCATTTAGCAGGAATTTCCTCTATTTTAGGTGCTGTTAATTTTATTACAACTGTAATTAATATACGATCAACAGGTATTACTTTTGATCGAATACCTTTATTTGTTTGATCTGTAGTAATTACAGCTTTATTACTTCTTTTATCTTTACCAGTTTTAGCTGGAGCTATTACTATACTATTAACTGATCGAAATCTTAACACTTCATTCTTTGATCCTGCAGGAGGAGGAGATCCAGTTTTATATCAACATTTATTT
>IBIDP002-19|Fannia canicularis|COI-5P|MN868723
AACATTATATTTTATTTTTGGTGCTTGATCTGGTATAGTAGGGACATCTTTAAGTATTCTAATTCGAGCTGAATTAGGTCATCCTGGAGCTTTAATTGGTGATGATCAAATTTATAATGTAATTGTTACAGCTCATGCTTTTATTATAATTTTTTTTATAGTAATACCTATTATAATTGGTGGATTTGGTAATTGATTAGTACCTTTAATATTAGGAGCTCCTGATATAGCATTTCCTCGAATAAATAATATAAGATTTTGATTATTACCTCCAGCTTTAACTTTATTACTAGTAAGAAGTATAGTAGAAAATGGAGCTGGTACTGGTTGAACTGTTTACCCTCCACTTTCATCTAACATTGCTCATAGAGGAGCTTCAGTTGATTTAGCAATTTTCTCTCTTCATCTCGCAGGTATTTCATCTATTTTAGGAGCTGTAAATTTTATTACAACTGTAATTAATATACGATCTACTGGAATTACATTTGATCGAATACCTTTATTTGTTTGATCTGTAGTTATTACAGCTTTATTATTACTTTTATCTTTACCAGTATTAGCTGGAGCTATTACTATATTATTAACAGATCGAAATCTTAATACCTCATTCTTTGACCCTGCAGGAGGTGGAGATCCTATCCTTTATCAACATTTATTT
>IBIDP004-19|Scathophaga stercoraria|COI-5P|MN868858
AACATTATACTTTATTTTTGGAGCATGATCCGGAATAATTGGAACTTCTTTAAGTATTCTAATTCGAGCTGAATTAGGACATCCTGGAGCATTAATTGGAGATGACCAAATCTATAATGTAATTGTAACAGCTCATGCTTTTATTATAATTTTTTTTATAGTAATACCAATTATAATTGGAGGATTTGGAAATTGATTAGTGCCTCTTATATTAGGTGCTCCTGATATAGCTTTCCCTCGAATAAATAATATAAGTTTTTGACTTTTACCACCAGCATTAACTTTATTGTTAGTAAGTAGTATAGTAGAAAACGGAGCTGGAACAGGATGAACTGTTTACCCTCCTTTATCTTCAAATATTGCTCATGGAGGAGCTTCTGTTGATTTAGCAATTTTTTCTCTTCATTTAGCAGGAATTTCATCTATTTTAGGAGCTGTAAATTTTATTACAACTGTAATTAATATACGATCAACAGGAATTACTTTTGATCGAATACCTTTATTTGTATGATCTGTAGTAATTACAGCTTTATTACTTTTATTATCTTTACCTGTTTTAGCTGGAGCTATTACTATACTATTAACAGATCGAAATCTTAATACATCATTTTTTGATCCAGCAGGAGGAGGAGACCCAATTCTATATCAACATTTATTT
>IBIDP005-19|Triarthria setipennis|COI-5P|MN868911
TACTCTATATTTTATCTTTGGAGCTTGAGCTGGAATAGTTGGAACTTCATTAAGTATTTTAATTCGAACTGAACTAGGACATCCTGGAGCATTAATTGGAGATGATCAAATTTATAATGTAATTGTCACAGCTCATGCTTTTATCATAATTTTTTTTATAGTAATACCAATTATAATTGGAGGGTTTGGAAATTGACTAGTTCCACTAATACTAGGAGCTCCAGATATAGCTTTTCCACGAATAAACAATATAAGTTTTTGGTTATTACCTCCTGCTTTAACTTTATTACTAATAAGTAGAATAGTAGAAAATGGAGCCGGTACAGGATGAACTGTATACCCTCCTTTATCTTCTAATATTGCTCATAGAGGTTCTTCAGTTGATTTAGCAATTTTTTCTCTTCATTTAGCAGGAATCTCCTCCATTTTAGGTGCTGTTAATTTTATTACTACAGTAATTAATATACGAACTACAGGAATTTCATTTGATCGAATACCTTTATTTGTTTGATCTGTTGTAATTACAGCTTTATTATTACTTCTATCTTTACCAGTATTAGCTGGAGCTATTACTATATTATTAACAGATCGAAATTTAAATACTTCATTTTTTGACCCAACAGGAGGTGGTGACCCTATTTTATACCAACATTTATTT
>IBIDP009-19|Calliphora vicina|COI-5P|MN868831
TACTTTATACTTTATTTTTGGAGCTTGATCGGGAATAATTGGAACTTCATTAAGAATTCTAATTCGAGCCGAACTAGGACATCCTGGAGCATTAATTGGAGATGACCAAATTTATAATGTAATTGTTACAGCTCATGCTTTTATTATAATTTTTTTTATAGTAATACCAATTATAATTGGAGGATTTGGTAATTGATTAGTCCCTTTAATATTAGGAGCTCCAGATATAGCCTTCCCTCGGATAAACAATATAAGTTTCTGACTTTTACCTCCTGCATTAACTTTACTATTAGTAAGTAGTATAGTAGAAAACGGAGCTGGAACAGGATGAACTGTTTACCCACCTTTATCTTCTAATATCGCTCATGGAGGAGCTTCTGTTGATTTAGCTATTTTTTCTTTACACTTAGCAGGAATTTCTTCAATTTTAGGAGCTGTAAATTTTATTACTACAGTTATTAATATACGATCAACAGGAATTACATTCGACCGAATACCATTATTTGTTTGATCTGTAGTAATTACAGCTTTATTACTTTTATTATCTTTACCAGTATTAGCAGGTGCTATTACTATATTATTAACAGATCGAAATCTTAATACATCATTCTTTGACCCAGCAGGAGGAGGAGACCCAATCTTGTACCAACATTTATTT
>IBIDP019-19|Eristalis tenax|COI-5P|MN868866
TACCTTATATTTTGTATTTGGAACATGAGCAGGTATAGTGGGAACTTCCTTAAGAATTTTAATTCGAGCTGAATTAGGCCATCCTGGAGCATTAATTGGAGATGATCAAATTTATAATGTTATTGTAACAGCTCATGCCTTTGTAATAATTTTCTTTATAGTAATACCTATTATAATTGGAGGATTTGGAAATTGATTAGTTCCTCTTATATTAGGAGCCCCTGATATAGCATTTCCTCGAATAAATAATATAAGTTTCTGATTATTACCTCCTTCTTTAACATTATTATTAGTAAGAAGTATAGTAGAAAATGGAGCTGGAACAGGATGAACTGTATACCCACCTTTATCAAGTAACATTGCACACGGAGGAGCCTCAGTTGATTTAGCAATTTTTTCACTTCATTTATCTGGTATATCATCTATTTTAGGTGCAGTAAATTTCATTACAACTATTATTAATATACGATCAACAGGAATTACATATGATCGAATACCTTTATTTGTATGATCTGTAGGTATTACAGCTTTACTACTACTTCTTTCCCTACCAGTTTTAGCAGGAGCAATTACTATATTATTAACTGATCGAAATTTAAATACATCATTTTTTGATCCAGCAGGAGGAGGTGATCCAATTTTATACCAACATTTATTT
>IBIDP020-19|Myathropa florea|COI-5P|MN868857
TACATTATATTTTATTTTTGGAACATGAGCAGGTATAGTAGGAACTTCATTAAGAATTTTAATTCGAGCTGAACTAGGACATCCTGGAGCCTTAATTGGTGATGATCAAATTTATAATGTTATTGTAACAGCTCATGCTTTTGTAATAATTTTTTTTATAGTTATACCTATTATAATTGGTGGATTCGGAAATTGATTAGTTCCTTTAATATTAGGAGCTCCTGATATAGCCTTTCCTCGAATAAACAATATAAGTTTTTGGTTACTTCCACCTTCTTTAACTTTATTATTAGTAAGAAGTATAGTAGAAAATGGAGCCGGAACTGGTTGAACAGTTTATCCACCTTTATCAAGAAATATTGCTCACGGTGGAGCATCTGTAGATTTAGCAATTTTTTCACTTCATTTATCTGGTATATCTTCAATTTTAGGTGCCGTAAATTTTATTACAACTGTAATTAATATACGATCAACAGGAATCACCTATGATCGAATACCTTTATTTGTATGATCTGTAGCAATTACTGCTCTTTTACTTCTGTTATCATTACCAGTTTTAGCTGGAGCTATTACAATATTATTAACAGATCGAAATTTAAATACATCATTTTTTGACCCAGCAGGAGGAGGAGATCCAATTTTATATCAACATCTATTT
>IBIDP021-19|Eristalis arbustorum|COI-5P|MN868732
AACATTATATTTTGTATTTGGAACATGAGCAGGAATAGTAGGAACCTCATTAAGAATTTTAATTCGAGCTGAATTAGGACATCCTGGAGCATTAATTGGTGATGATCAAATTTATAATGTTATTGTAACAGCTCATGCTTTCGTAATAATTTTCTTTATAGTTATACCTATTATAATTGGAGGATTTGGAAATTGATTAGTTCCTCTTATATTAGGTGCTCCTGATATAGCATTTCCTCGTATAAATAATATAAGTTTCTGATTACTACCTCCTTCTTTAACTCTATTATTAGTAAGAAGTATAGTAGAAAATGGAGCTGGAACAGGATGAACAGTTTATCCACCTTTATCAAGAAATATTGCTCATGGTGGAGCTTCAGTTGATTTAGCTATTTTTTCTTTACATTTATCAGGTATGTCTTCTATTTTAGGAGCAGTAAATTTCATTACAACAGTTATTAATATACGATCTACAGGAATTACATATGATCGAATACCTTTATTTGTATGATCAGTTGCTATTACAGCTTTATTACTTCTTTTATCACTTCCAGTTCTAGCTGGAGCAATTACAATATTATTAACTGATCGAAATTTAAATACCTCTTTTTTTGATCCAGCAGGAGGAGGAGATCCAATTTTATACCAACATTTATTT
>IBIDP025-19|Sphaerophoria scripta|COI-5P|MN868867
AACATTATATTTTCTATTTGGAGCTTGAGCTGGAATAGTAGGAACTTCTTTAAGTATTTTAATTCGTATAGAACTTGGTCATCCAGGAGCATTAATTGGAGATGACCAAATTTATAATGTAATTGTTACTGCACATGCTTTTGTTATAATTTTTTTTATAGTAATACCTATTATAATTGGAGGATTTGGTAATTGATTAGTTCCTTTAATATTAGGAGCTCCTGATATAGCTTTCCCCCGAATAAATAATATAAGTTTCTGATTATTACCTCCTTCTCTAACATTACTTTTAGTAAGTAGTATAGTTGAAAATGGAGCAGGAACTGGATGAACAGTTTATCCACCTCTTTCTGCAAGAATTGCTCATGGTGGAGCTTCTGTAGATTTAGCAATTTTTTCATTACATTTAGCAGGAATATCATCAATTTTAGGGGCTGTAAATTTTATTACAACAGTAATTAATATACGATCAAATGGAATTTCATATGATCGAATACCTTTATTTGTATGATCAGTAGTAATTACTGCTTTATTATTACTTTTATCTTTACCTGTATTAGCAGGAGCAATTACTATACTTTTAACAGATCGAAATTTAAATACATCTTTCTTTGACCCAGCTGGAGGAGGAGACCCAATTTTATATCAACATTTATTT
>IBIDP030-19|Physiphora alceae|COI-5P|MN868832
AACTTTATATTTTATCTTCGGAGCTTGAGCTGGAATAGTTGGTACCTCTCTAAGAATTTTAATTCGAGCTGAACTAGGCCACCCTGGAGCTCTAATTGGAGATGACCAAATTTATAACGTAATTGTAACTGCTCATGCATTCGTAATAATTTTCTTCATAGTTATACCTATTATAATTGGAGGATTTGGTAATTGATTGGTCCCATTAATACTAGGAGCCCCTGATATAGCTTTTCCTCGAATAAATAATATAAGCTTCTGACTTCTTCCTCCCTCTCTTACTCTTCTATTAGTAAGTTCAATAGTAGAAAATGGAGCTGGAACAGGATGAACAGTTTACCCTCCTTTATCATCAGTAATTGCCCACGGAGGAGCATCAGTAGATTTAGCTATTTTCTCTTTACATTTAGCCGGGGTTTCATCAATTCTAGGAGCTGTAAATTTTATTACTACAGTAATTAATATACGAGCTACAGGAATCACATTTGACCGAATACCTTTATTCGTATGATCAGTAGTAATTACTGCCCTACTCCTACTTCTTTCATTACCCGTATTAGCAGGAGCTATTACAATACTTTTAACAGACCGAAATTTAAATACTTCATTCTTTGACCCAGCTGGAGGAGGAGATCCTATTCTTTATCAACATTTATTT
>IBIDP032-19|Hermetia illucens|COI-5P|MN868787
TACATTATATTTTATCTTTGGAGCCTGAGCTGGTATAGTGGGAACTTCTTTAAGAATTCTTATTCGAGCCGAATTAGGTCATCCAGGAGCTTTAATTGGAGATGACCAAATTTATAACGTAATTGTTACTGCCCATGCTTTTGTAATAATTTTCTTTATAGTAATGCCAATTATAATTGGTGGATTTGGTAATTGACTTGTTCCCCTAATATTAGGAGCCCCTGATATAGCTTTCCCACGAATAAATAACATAAGTTTCTGGTTACTTCCCCCCTCTCTCACTCTTTTATTAGCCTCTTCTATAGTAGATGCCGGAGCAGGAACCGGTTGAACTGTCTACCCCCCCTTAGCCGCTGGTATTGCTCATAGTGGAGCTTCAGTTGACCTAGCTATTTTTTCCCTTCACTTAGCCGGGATTTCTTCAATTTTAGGGGCTGTAAATTTTATTACAACAGTAATCAATATGCGATCGACAGGAATTACATTTGATCGAATACCTCTATTTGTTTGATCAGTAGTAATTACAGCAGTACTTCTCCTTCTGTCACTTCCTGTTCTTGCTGGAGCTATTACCATATTATTAACAGATCGAAATTTAAATACTTCTTTCTTCGACCCAGCCGGAGGAGGAGATCCCATTCTTTATCAACATTTATTT
>IBIDP038-19|Minettia longipennis|COI-5P|MN868895
AACCTTATACTTTCTATTTGGAGCGTGAGCTGGAATAGTAGGAACATCGTTAAGAATTTTAATTCGAGCAGAATTAGGTCATCCAGGTGCCTTAATTGGAGATGATCAAATTTATAATGTAATTGTCACAGCTCATGCTTTTGTAATAATTTTCTTCATAGTTATACCAATTATAATTGGAGGATTTGGAAATTGATTAGTTCCTTTAATATTAGGAGCTCCTGATATAGCATTTCCTCGAATGAATAATATAAGATTTTGACTTTTACCCCCTTCCTTAACTCTTCTTTTAGTGAGAAGAATAGTCGAAAACGGGGCTGGAACAGGATGAACTGTTTACCCTCCTTTATCCTCAGGAATCGCTCATGGAGGAGCTTCAGTTGATTTAGCAATTTTTAGTTTACACCTAGCAGGAGTTTCTTCAATTTTAGGAGCTGTAAATTTTATTACAACTGTAATTAATATGCGGTCAACTGGAATTACTTTTGATCGAATACCTTTATTTGTGTGATCTGTCGTAATTACTGCTCTTCTTCTTCTCCTTTCTCTTCCTGTTTTAGCTGGAGCAATTACGATGTTATTAACAGATCGAAATTTAAATACTTCATTTTTTGACCCTGCAGGAGGGGGAGACCCAATTCTGTACCAACATTTATTT
>IBIDP049-19|Norellisoma spinimanum|COI-5P|MN868878
CACATTATATTTTATTTTTGGAGCATGATCTGGGATAGTAGGAACTTCTTTAAGTATACTAATTCGAGCCGAATTAGGACATCCTGGAGCATTGATTGGAGATGATCAAATTTACAATGTAATTGTAACAGCTCATGCTTTTATTATAATTTTTTTTATAGTAATACCTATTATAATTGGAGGATTTGGTAATTGATTAGTACCTCTTATATTAGGTGCTCCTGATATAGCTTTCCCCCGAATAAATAATATAAGTTTTTGACTTTTACCTCCAGCAATCACTTTATTATTAGTAAGTAGTATAGTAGAAAACGGAGCTGGAACAGGATGAACTGTTTATCCTCCTTTATCTTCAAATATTGCTCATAGTGGTGCTTCTGTAGACTTAGCAATTTTTTCTCTTCATTTAGCAGGTATTTCATCTATTTTAGGTGCTGTTAATTTTATTACAACTGTAATTAATATACGATCAACAGGAATTACTTTTGATCGAATACCTTTATTTGTATGATCTGTAATAATTACAGCTTTATTACTTCTTTTGTCTCTGCCAGTTTTAGCAGGAGCTATTACTATATTATTAACAGATCGAAATCTTAATACTTCATTTTTTGATCCTGCAGGAGGAGGAGATCCAATTTTATACCAACATTTATTT
>IBIDP056-19|Musca autumnalis|COI-5P|MN868890
TACCTTATATTTTATCTTTGGAGCATGATCTGGTATAATTGGAACTTCATTAAGAATTTTAATTCGAGCTGAATTAGGGCACCCTGGTGCACTAATTGGTGATGACCAAATTTATAATGTTATTGTAACAGCTCATGCTTTTATTATAATTTTCTTTATAGTTATACCTATTATAATTGGAGGATTTGGAAATTGATTAGTTCCTTTAATACTAGGAGCTCCTGATATAGCATTCCCTCGAATGAATAATATAAGTTTCTGACTTTTACCTCCTGCTTTAACCTTATTATTAGTTAGAAGCATAGTAGAAAAGGGAGCTGGGACAGGATGAACTGTATACCCACCTTTATCTTCAATTATTGCTCATGGAGGAGCTTCTGTTGATTTAGCTATTTTTTCATTACATTTAGCTGGAATTTCTTCAATTTTAGGAGCAGTAAATTTTATTACAACCGTAATTAATATGCGGGCTACTGGGATTACATTTGATCGAATACCTTTATTCGTTTGATCAGTTGTAATTACTGCTCTATTACTTTTACTTTCTCTTCCAGTTTTAGCCGGAGCTATCACAATATTATTAACGGATCGGAATTTAAATACTTCATTCTTTGACCCTGCGGGAGGAGGAGACCCAATTCTTTACCAACATTTATTT
>IBIDP062-19|Fannia canicularis|COI-5P|MN868877
AACATTATATTTTATTTTTGGTGCTTGATCTGGTATAGTAGGGACATCTTTAAGTATTCTAATTCGAGCTGAATTAGGTCATCCTGGAGCTTTAATTGGTGATGATCAAATTTATAATGTAATTGTTACAGCTCATGCTTTTATTATAATTTTTTTTATAGTAATACCTATTATAATTGGTGGATTTGGTAATTGATTAGTACCTTTAATATTAGGAGCTCCTGATATAGCATTTCCTCGAATAAATAATATAAGATTTTGATTATTACCTCCAGCTTTAACTTTATTACTAGTAAGAAGTATAGTAGAAAATGGAGCTGGTACTGGTTGAACTGTTTACCCTCCACTTTCATCTAACATTGCTCATAGAGGAGCTTCAGTTGATTTAGCAATTTTCTCTCTTCATCTCGCAGGTATTTCATCTATTTTAGGAGCTGTAAATTTTATTACAACTGTAATTAATATACGATCTACTGGAATTACATTTGATCGAATACCTTTATTTGTTTGATCTGTAGTTATTACAGCTTTATTATTACTTTTATCTTTACCAGTATTAGCTGGAGCTATTACTATATTATTAACAGATCGAAATCTTAATACCTCATTCTTTGACCCTGCAGGAGGTGGAGATCCTATCCTTTATCAACATTTATTT
>IBIDP064-19|Dexia rustica|COI-5P|MN868902
AACTTTATATTTTATTTTCGGAACATGATCAGGAATACTAGGAACCTCTTTAAGTATTCTAATTCGAACTGAATTAGGACATCCAGGATCCTTAATTGGAGATGATCAAATCTATAATGTTATTGTAACAGCCCACGCATTTATTATAATTTTTTTTATAGTTATACCTATTATAATTGGAGGATTTGGAAACTGACTAGTACCCCTAATACTAGGAGCTCCAGATATAGCTTTCCCACGAATAAATAATATAAGTTTTTGATTATTACCCCCTTCTTTATTATTACTATTAATAAGCAGTATAGTAGAAAATGGAGCTGGTACAGGATGAACCGTTTACCCACCTTTATCATCTAACATTGCTCACAATGGAGCCTCTGTAGATTTAACTATTTTTTCTCTTCACTTAGCCGGAATTTCTTCAATTATAGGAGCTATTAATTTTATTACAACAGTAATTAATATACGAACAGTTGGAATTACTTTAGATCGCATACCTTTATTTGTTTGATCTGTAATAATTACAGCTATTTTATTACTTTTATCCCTTCCTGTACTAGCTGGAGCAATTACAATATTATTAACAGATCGTAATTTTAATACATCTTTTTTTGATCCTGCAGGAGGAGGTGATCCTATTTTATATCAACATTTATTT
>IBIDP065-19|Suillia variegata|COI-5P|MN868769
AACCCTTTATTTTATATTCGGGGCCTGAGCAGGTATGGTTGGAACTTCTTTAAGAATTTTAATTCGAACCGAACTCGGGCACCCTGGCGCCTTAATTGGTGATGACCAAATTTATAATGTTATTGTTACAGCTCATGCTTTTGTAATAATTTTTTTCATAGTAATACCAATTATAATCGGAGGATTTGGAAATTGATTGGTTCCCTTAATATTAGGGGCCCCTGATATGGCCTTTCCCCGAATGAATAATATAAGTTTTTGGTTGTTACCCCCTTCTTTAACTTTACTATTAGTAAGTAGTATAGTTGAAAATGGGGCGGGGACGGGTTGAACTGTTTACCCCCCACTCTCTTCAGGAATTGCACATGGAGGAGCATCTGTTGATTTAGCTATTTTTTCTCTTCACTTAGCTGGGATCTCTTCAATTTTAGGAGCAGTAAATTTTATTACTACTGTAATTAATATGCGATCAACAGGAATTACATTTGACCGAATACCTTTATTTGTTTGATCAGTAGTAATTACAGCTTTATTACTTCTTTTATCTTTACCTGTATTAGCAGGAGCTATTACTATATTATTAACAGATCGAAATTTAAATACCTCTTTTTTTGACCCAGCTGGAGGGGGAGACCCAATTTTATACCAACACTTATTT
>IBIDP067-19|Phaonia fuscata|COI-5P|MN868780
AACATTATACTTTATTCTTGGAGCCTGAGCAGGCATAATTGGAACTTCATTAAGTATATTAATTCGTGCTGAATTAGGTCACCCAGGAGCATTAATCGGAAATGATCAAATTTATAATGTAATTGTAACAGCTCATGCTTTTATTATAATTTTTTTTATAGTAATACCAATTATAATTGGAGGATTTGGAAATTGATTAGTACCACTAATACTTGGAGCACCAGATATAGCATTCCCTCGAATAAATAATATAAGATTTTGACTTTTACCTCCAGCTTTAAGATTACTATTAATTAGTAGAATAGTAGAAAATGGAGCTGGTACAGGATGAACTGTCTACCCCCCCTTATCTTCTAATATTGCACATAGAGGAGCTTCAGTTGATTTAACAATTTTTTCCCTTCATTTAGCTGGAATTTCTTCTATTTTAGGGGCTATTAATTTTATCACAACCGTAATTAATATACGTTCTATAGGAATTACATTTGACCGTTTACCTTTATTTGTATGATCTGTAATAATTACTGCTATTTTACTACTTTTATCCTTACCTGTTTTAGCAGGAGCAATTACAATATTACTAACAGATCGAAATTTTAATACCTCTTTTTTTGACCCTGCAGGGGGTGGAGACCCTGTTTTATACCAACACTTATTT
>IBIDP083-19|Lucilia caesar|COI-5P|MN868752
TACTTTATACTTTATTTTTGGAGCTTGATCCGGTATAATCGGAACTTCATTAAGAATTTTAATTCGAGCTGAATTAGGACACCCTGGTGCATTAATTGGAGATGACCAAATTTATAATGTAATTGTTACAGCTCATGCTTTTATTATAATTTTCTTTATAGTAATACCAATTATAATTGGAGGATTTGGAAATTGATTAGTTCCTTTAATATTAGGAGCCCCAGATATGGCATTCCCTCGAATAAATAATATAAGATTTTGACTTTTACCTCCTGCATTAACTTTATTATTAGTAAGTAGTATAGTAGAAAACGGAGCTGGAACAGGATGAACAGTTTACCCTCCTTTATCATCTAATATCGCTCATGGAGGAGCTTCTGTTGATTTAGCTATTTTTTCTCTTCATTTAGCAGGGATCTCATCAATTTTAGGGGCTGTAAATTTTATTACTACAGTTATTAATATACGATCAACAGGAATTACTTTTGACCGAATACCTTTATTCGTTTGATCAGTAGTAATTACAGCTTTATTACTTTTATTATCATTACCAGTATTAGCTGGAGCTATTACTATACTTTTAACTGACCGAAATCTTAATACTTCATTCTTTGATCCAGCAGGAGGAGGAGACCCAATTTTATACCAACATTTATTT
>IBIDP088-19|Hermetia illucens|COI-5P|MN868751
AACTTTATATTTTATCTTTGGGGCCTGAGCTGGTATAGTAGGAACTTCTTTAAGAATCCTTATTCGAGCCGAATTAGGTCACCCAGGAGCTTTAATTGGAGATGACCAAATTTATAACGTAATTGTTACTGCCCATGCTTTTGTAATAATTTTCTTTATAGTTATACCAATTATAATTGGTGGATTTGGTAATTGACTTGTTCCCCTGATATTAGGAGCCCCTGATATAGCTTTTCCACGAATAAATAACATAAGTTTCTGGCTACTTCCCCCCTCTCTCACTCTTTTATTAGCATCTTCTATAGTAGATGCTGGAGCAGGAACCGGTTGAACTGTCTACCCCCCCTTAGCCGCTGGTATTGCCCATAGAGGGGCTTCAGTTGATCTAGCTATTTTTTCCCTTCATTTAGCCGGGATTTCTTCAATTTTAGGAGCCGTAAATTTTATTACTACAGTAATCAATATACGATCGACAGGAATTACATTTGATCGAATGCCCCTATTTGTTTGATCAGTGGTAATTACAGCAGTACTTCTTCTTCTGTCACTTCCTGTTCTTGCTGGGGCTATTACCATATTATTAACAGATCGAAATTTAAATACTTCTTTCTTCGACCCAGCCGGAGGAGGTGATCCCATTCTTTATCAACATTTATTT
>IBIDP090-19|Leucophenga maculata|COI-5P|MN868833
AACATTATATTTTATTTTTGGGGCATGAGCTGGAATAGTGGGAACTTCTTTAAGAATTCTTATTCGAGCTGAATTAGGACATCCTGGTGCTCTAATTGGTGATGATCAAATTTATAATGTGATCGTAACTGCTCATGCTTTTGTTATAATTTTTTTTATAGTAATACCTATTATAATTGGAGGATTTGGAAATTGATTAGTTCCTTTAATATTAGGAGCTCCAGATATAGCATTCCCTCGAATAAATAATATAAGATTTTGACTATTACCTCCTGCTTTAACACTATTGTTAGTAAGTAGTATAGTAGAAAACGGAGCTGGGACAGGTTGAACTGTTTACCCTCCATTATCTTCAGGAATTGCTCATGGAGGAGCTTCTGTTGATTTAGCAATTTTTTCATTACATTTAGCTGGAATTTCTTCAATTTTAGGAGCTGTAAATTTTATTACTACAGTTATTAATATACGAACAACAGGAATTACTTTAGATCGAATACCATTATTTGTATGATCAGTAGTAATTACTGCTTTATTACTTTTATTATCATTACCTGTATTAGCTGGAGCTATCACTATATTATTAACAGATCGAAATTTAAATACTTCATTTTTTGATCCTGCTGGAGGAGGAGATCCAATTCTTTACCAACATTTATTT
>IBIDP094-19|Leskia aurea|COI-5P|MN868859
AACTTTATATTTTATTTTTGGTGCTTGATCAGGAATGGTAGGAACTTCTTTAAGTATTTTAATTCGAACTGAATTAGGTCATCCAGGAGCTTTAATTGGAGATGATCAAATTTATAATGTAATTGTAACAGCTCATGCCTTTGTTATAATTTTTTTTATAGTAATACCAATTATAATTGGAGGATTCGGGAATTGACTAGTCCCATTAATATTAGGAGCCCCAGATATAGCATTCCCTCGAATAAATAACATAAGATTTTGACTATTACCTCCTGCATTAACATTATTACTAATAAGTAGTATAGTTGAAAACGGAGCCGGAACTGGATGAACTGTTTATCCACCTTTATCTTCTAATATTGCTCATGGGGGTGCCTCAGTAGATTTAGCAATTTTTTCACTTCATTTAGCAGGAATTTCTTCTATTTTAGGAGCTGTAAATTTTATTACTACAGTAATTAATATACGATCAACTGGAATTACATTTGATCGTATACCTTTATTTGTCTGATCTGTAACAATTACAGCATTATTACTCTTATTATCTTTACCAGTATTAGCAGGAGCAATTACTATATTATTAACTGATCGAAACCTAAATACTTCCTTTTTTGACCCAGCTGGAGGAGGAGATCCTATTTTATACCAACATTTATTT
>IBIDP095-19|Eristalinus aeneus|COI-5P|MN868834
TACATTATATTTTGTATTTGGTACATGAGCAGGAATAGTTGGTACTTCATTAAGAGTATTAATTCGAGCTGAATTAGGTCATCCTGGTGCTTTAATTGGTGATGATCAAATTTATAACGTAATTGTTACAGCTCATGCTTTTGTAATAATTTTTTTTATAGTAATACCTATTATAATTGGAGGATTTGGAAATTGATTAGTACCTCTTATATTAGGAGCTCCTGATATAGCATTTCCTCGAATAAATAATATAAGTTTCTGATTACTACCTCCTTCTTTAACTTTACTATTAGTAAGAAGCATAGTAGAAAATGGAGCTGGAACAGGATGAACAGTATACCCCCCTTTATCAAGAAATATTGCTCACGGTGGAGCATCAGTTGATTTAGCAATTTTTTCTTTACATCTTTCTGGTATATCTTCAATTCTAGGAGCAGTAAATTTTATTACAACTGTAATTAATATACGATCAACAGGAATTACATATGATCGAATACCTTTATTTGTTTGATCAGTAGCTATTACAGCTCTTTTACTTCTTCTTTCATTACCTGTATTAGCAGGAGCAATTACAATACTATTAACAGATCGAAATTTAAATACATCATTCTTTGACCCAGCAGGTGGAGGAGATCCAATTTTATATCAACATTTATTT
>IBIDP098-19|Diplotoxa messoria|COI-5P|MN868905
AACATTATATTTTATATTTGGAGCATGAGCTGGAATAGTAGGAACTTCTTTAAGAATTTTAATTCGAGCAGAATTAGGTCACCCAGGAGCTCTAATTGGAGATGATCAAATTTATAATGTTATTGTTACTGCTCATGCATTTGTAATAATTTTCTTTATAGTAATACCTATTATAATTGGAGGATTTGGTAATTGACTTGTTCCTCTTATATTAGGAGCACCTGATATAGCATTTCCTCGAATAAATAATATAAGATTTTGATTACTTCCACCTTCTTTAACATTATTAATAGCAAGTAGTATAATTGAAAATGGAGCTGGAACTGGATGAACTGTTTATCCACCTCTTTCATCAATCATTGCACATGGAGGACCATCAGTAGATTTAGCAATTTTTTCACTACATTTAGCTGGAATTTCATCTATTTTAGGAGCTGTTAATTTTATTACTACTGCTATTAATATACGATCTACAGGAATTACATTTGACCGAATACCATTATTTGTTTGATCAGTAATAATTACTGCTTTATTATTATTATTATCATTACCAGTACTAGCTGGAGCTATTACTATATTATTAACTGATCGAAATTTAAATACTTCATTTTTTGATCCAGCAGGAGGAGGAGATCCAATTCTTTATCAACATTTATTT
>IBIDP099-19|Trigonometopus frontalis|COI-5P|MN868863
TACATTATATTTTTTATTTGGAGCTTGAGCAGGAATAGTTGGTACTTCTCTAAGTATTATTATTCGAGCAGAATTAGGACATCCTGGTGCATTAATTGGAGATGATCAAATTTACAATGTAATTGTTACTGCACATGCATTTGTAATAATTTTTTTTATGGTTATACCAATTATAATTGGTGGATTCGGTAATTGATTAATCCCTTTAATATTAGGAGCACCAGATATAGCTTTTCCTCGAATGAATAATATAAGATTTTGACTTTTACCTCCTTCTTTAACCCTATTATTAGTAAGAAGAATGGTTGAAAACGGTGCTGGGACAGGGTGAACAGTTTACCCCCCATTATCTTCGGGAATTGCTCATAGAGGAGCTTCTGTTGATTTAGCTATTTTTAGACTTCATTTAGCTGGAATTTCATCAATTTTAGGAGCAGTAAATTTTATTACAACTGTAATTAATATACGAGCTTCAGGAATTTCATTTGATCGAATACCATTATTTGTCTGATCTGTTGTAATTACTGCTCTCTTACTTCTTCTTTCTCTTCCAGTATTAGCTGGAGCTATTACAATGTTATTAACGGATCGAAATTTAAATACTTCTTTTTTCGACCCTGCAGGAGGTGGAGATCCAATTTTATACCAACATTTATTT
>IBIDP104-19|Ectophasia crassipennis|COI-5P|MN868783
AACTTTGTACTTTATTTTTGGAGCCTGATCTGGTATAGTAGGAACCTCATTAAGTATTTTAATTCGAGCTGAATTAGGTCATCCTGGTTCTTTAATTGGAGATGATCAAATTTATAATGTAATTGTAACAGCTCATGCTTTTATTATAATTTTCTTTATAGTTATACCAATTATAATTGGAGGATTTGGAAATTGATTAGTTCCATTAATATTAGGAGCTCCAGATATAGCTTTCCCACGAATAAACAATATAAGTTTTTGATTACTCCCTCCTGCATTAACGCTTCTTCTAATAAGAAGAATAGTTGAAAATGGAGCTGGAACAGGTTGAACTGTCTACCCACCTTTATCTTCTAATATTGCTCATGGAGGTGCTTCTGTAGATTTAGCAATTTTTTCATTACACCTAGCTGGAATTTCTTCAATTTTAGGAGCTGTAAATTTTATTACAACAGTAATTAATATACGAGCAACAGGAATTACATTTGATCGAATACCATTATTTGTTTGATCTGTTGTAATTACAGCTTTATTATTATTATTATCTTTACCAGTATTAGCAGGAGCTATTACTATATTATTAACAGATCGAAATCTTAATACTTCATTCTTTGACCCTGCAGGAGGAGGAGACCCAATTTTATACCAACATTTATTT
>IBIDP108-19|Chrysotoxum intermedium|COI-5P|MN868823
TACATTATATTTTTTATTTGGAGCTTGAGCAGGAATAGTAGGTACTTCTTTAAGTATTCTAATTCGATCTGAACTTGGTCATCCAGGTGCATTAATCGGAGATGATCAAATTTATAATGTAATTGTAACTGCTCATGCCTTTGTTATAATTTTTTTTATAGTTATACCTATTATAATTGGAGGATTTGGAAACTGATTAGTTCCTTTAATATTAGGAGCTCCTGATATAGCATTTCCTCGTATAAATAATATAAGTTTTTGACTTTTACCTCCTTCTTTAACATTACTTTTAATAAGAAGAATAATTGAAAATGGGGCTGGAACAGGTTGAACAGTATATCCTCCTCTTTCTGCTGGAATTGCACATGGAGGGGCATCTGTTGATTTAGCTATTTTTTCACTTCATTTAGCTGGTATATCCTCTATTTTAGGTGCAGTAAATTTTATTACTACTGTAATTAATATACGATCAAATGGAATTACTTATGATCGTATACCTTTATTTGTTTGATCAGTAGTAATTACAGCTTTATTATTACTTTTATCATTACCAGTATTAGCTGGAGCTATTACAATACTTTTAACAGATCGAAATTTAAATACTTCATTTTTTGACCCTGCAGGTGGAGGAGATCCAATTTTATATCAACATTTATTT
>IBIDP109-19|Stomorhina lunata|COI-5P|MN868825
TACTTTATATTTCATTTTTGGAGCATGATCTGGTATAATTGGAACATCTTTAAGAATTTTAATTCGAGCCGAATTAGGTCATCCTGGAGCTTTAATTGGAGATGATCAAATTTATAATGTAATTGTTACAGCTCATGCTTTTGTAATAATTTTTTTTATAGTAATACCAATTATAATTGGAGGATTTGGAAATTGATTAGTTCCTTTAATATTAGGAGCACCAGATATAGCATTCCCTCGAATAAATAATATAAGTTTTTGACTTTTACCTCCTGCATTAACTTTATTATTAGTCAGTAGTATAGTAGAAAATGGAGCTGGGACAGGATGAACTGTTTACCCACCCTTATCTTCTAATATCGCTCATGGAGGAGCTTCAGTTGATTTAGCTATTTTCTCATTACATTTAGCAGGAATTTCTTCTATTTTAGGAGCTGTAAATTTTATTACGACTGTAATTAATATACGATCAACTGGAATTACTTTTGATCGTATACCTTTATTTGTTTGATCTGTAGTAATTACAGCTTTATTACTTTTATTATCTTTACCTGTATTAGCCGGAGCTATTACTATATTATTAACAGATCGAAATTTAAATACTTCTTTCTTTGATCCAGCAGGAGGAGGAGACCCAATTTTATACCAACATTTATTT
>IBIDP116-19|Polietes meridionalis|COI-5P|MN868802
AACACTATATTTTATTTTCGGAGCATGATCAGGTATAATTGGAACTTCATTAAGAATTTTAATTCGAGCTGAATTAGGACATCCTGGAGCATTAATTGGAGATGATCAAATTTATAATGTAATTGTTACTGCTCATGCTTTTGTTATAATTTTCTTTATAGTAATACCTATTATAATTGGAGGATTTGGAAATTGATTAGTTCCTTTAATATTAGGAGCTCCTGATATAGCTTTTCCTCGAATAAATAATATAAGTTTTTGACTTTTACCCCCTGCTTTAACATTATTATTAGTTAGAAGAATAGTAGAAAAGGGAGCTGGAACAGGATGAACTGTTTACCCACCTTTATCATCCAATATTGCTCATGGAGGAGCTTCTGTTGATTTAGCTATTTTTTCTTTACATTTAGCTGGAATTTCCTCAATTCTTGGAGCTGTAAATTTTATTACTACTGTTATTAATATACGATCTACTGGAATTACATTTGATCGTATACCATTATTTGTTTGATCTGTAGTAATTACAGCTTTATTATTACTTTTATCCCTTCCAGTATTAGCAGGAGCTATTACAATATTATTAACTGATCGAAATTTAAATACTTCTTTTTTTGACCCAGCCGGAGGAGGAGATCCAATCTTATATCAACATCTATTC
>IBIDP117-19|Sphaerophoria rueppelli|COI-5P|MN868795
AACATTATATTTTCTATTTGGAGCTTGAGCTGGAATAGTAGGAACATCTTTAAGTATTTTAATTCGTATAGAACTTGGTCATCCAGGAGCATTAATTGGAGATGATCAAATTTATAATGTAATTGTTACTGCACATGCTTTTGTTATAATTTTTTTTATAGTAATACCTATTATAATTGGAGGATTTGGAAATTGATTAGTTCCTTTAATATTAGGAGCTCCTGATATAGCTTTTCCTCGAATAAATAATATAAGTTTCTGATTATTACCTCCTTCTTTAACATTACTTTTAGTAAGTAGTATAGTTGAAAATGGAGCAGGAACTGGATGAACAGTTTATCCACCTCTTTCAGCTAGAATTGCTCATGGTGGAGCTTCTGTAGATTTAGCAATTTTTTCATTACATTTAGCAGGAATATCATCAATTTTAGGAGCTGTAAATTTTATTACAACAGTAATTAATATACGATCAAATGGAATTTCATATGATCGAATACCTTTATTTGTATGATCAGTAGTAATTACTGCTTTATTATTACTTTTATCTTTACCTGTATTAGCAGGAGCTATTACTATACTTTTAACAGATCGAAATTTAAATACTTCTTTCTTTGATCCAGCTGGAGGAGGAGACCCAATTTTATATCAACATTTATTT
>IBIDP118-19|Ceroxys urticae|COI-5P|MN868720
TACCCTTTATTTTATTTTCGGAGCTTGAGCAGGTATAGTAGGGACTTCCCTTAGAATCCTTATTCGTGCTGAACTAGGTCATCCAGGAGCTTTAATTGGAGACGACCAAATTTATAATGTAATTGTAACAGCCCACGCATTTGTTATAATTTTCTTTATAGTAATACCTATCATAATTGGTGGATTTGGAAATTGATTAGTCCCTCTAATATTAGGAGCTCCTGATATGGCATTCCCACGAATAAATAATATAAGATTCTGACTATTACCTCCGTCATTAACTCTACTGTTAGTCAGTAGTATAGTAGAAAACGGGGCTGGAACAGGTTGAACTGTTTACCCTCCTCTTTCATCTGTAATTGCACATGGAGGAGCTTCTGTCGACTTAGCAATTTTCTCCCTTCATTTAGCTGGAGTTTCATCAATTCTAGGTGCTGTAAATTTTATTACTACAGTAATTAATATACGATCAACAGGAATTTCATTTGACCGAATACCTTTATTTGTGTGATCAGTTGTTATTACAGCCCTTTTATTACTCCTTTCATTGCCTGTATTAGCAGGAGCTATTACTATACTATTAACAGATCGAAATCTAAATACCTCATTCTTTGACCCTGCAGGAGGAGGAGATCCGATTTTATACCAACACCTATTT
>IBIDP119-19|Pherbellia dorsata|COI-5P|MN868904
AACTTTATATTTTCTATTTGGAGCTTGAGCTGGAATAGTGGGTACTTCTTTAAGAATTTTAATTCGAGCAGAATTAGGCCATCCAGGAGCTCTAATTGGAGATGATCAAATTTATAATGTAATTGTTACTGCTCATGCATTTGTAATAATTTTCTTTATAGTAATACCAATTATAATTGGAGGATTTGGTAATTGACTAGTACCCCTAATACTAGGAGCCCCAGATATAGCCTTTCCTCGAATAAATAATATAAGATTTTGATTATTACCTCCTTCTCTTACACTATTATTAGTAAGTAGAATAGTTGAAAATGGGGCTGGTACAGGTTGAACTGTTTACCCTCCTCTTTCATCTACAATTGCACATGGTGGAGCTTCTGTAGATTTAGCTATTTTTAGATTACATTTAGCTGGAATTTCATCTATTTTAGGGGCAGTAAATTTTATCACTACTGTAATTAATATACGATCATATGGAATTACTTTTGATCGAATACCTTTATTTGTATGATCAGTAGTAATTACAGCTCTTTTATTACTATTATCTCTACCTGTATTAGCTGGAGCTATTACTATACTACTTACAGATCGAAATTTAAATACATCTTTCTTCGACCCAGCTGGAGGAGGGGATCCAATTTTATATCAACATTTATTT
>IBIDP125-19|Chrysomya albiceps|COI-5P|MN868772
TACTTTATATTTCATTTTCGGAGCTTGATCTGGAATAGTAGGAACTTCTTTAAGAATTCTAATTCGAGCTGAATTAGGACATCCTGGAGCACTAATTGGAGATGACCAAATTTATAATGTAATTGTAACAGCTCATGCCTTTATTATAATTTTCTTTATAGTAATACCAATTATAATTGGAGGATTTGGAAATTGACTAGTTCCTTTAATATTAGGAGCCCCAGATATAGCTTTCCCACGAATAAATAATATAAGTTTCTGACTTTTACCTCCTGCATTAACTTTACTATTAGTAAGTAGTATAGTAGAAAATGGAGCTGGAACAGGATGAACTGTTTATCCACCTTTATCATCTAATATTGCTCATGGTGGAGCATCAGTTGATTTAGCTATTTTTTCTTTACACTTAGCTGGAATTTCATCAATTTTAGGAGCTGTAAATTTTATTACAACTGTTATTAATATACGATCTACAGGAATCACATTTGATCGAATACCTTTATTCGTATGATCTGTAGTTATTACTGCTCTTCTTTTATTATTATCATTACCAGTATTAGCCGGTGCAATTACTATATTATTAACTGATCGAAATTTAAATACTTCATTCTTTGATCCAGCAGGAGGAGGAGATCCTATTTTATATCAACATTTATTT
>IBIDP127-19|Diplotoxa messoria|COI-5P|MN868777
AACATTATATTTTATATTTGGAGCATGAGCTGGAATAGTAGGAACTTCTTTAAGAATTTTAATTCGAGCAGAATTAGGTCACCCAGGAGCTCTAATTGGAGATGATCAAATTTATAATGTTATTGTTACTGCTCATGCATTTGTAATAATTTTCTTTATAGTAATACCTATTATAATTGGAGGATTTGGTAATTGACTTGTTCCTCTTATATTAGGAGCACCTGATATAGCATTTCCTCGAATAAATAATATAAGATTTTGATTACTTCCACCTTCTTTAACATTATTAATAGCAAGTAGTATAATTGAAAATGGAGCTGGAACTGGATGAACTGTTTATCCACCTCTTTCATCAATCATTGCACATGGAGGACCATCAGTAGATTTAGCAATTTTTTCACTACATTTAGCTGGAATTTCATCTATTTTAGGAGCTGTTAATTTTATTACTACTGCTATTAATATACGATCTACAGGAATTACATTTGACCGAATACCATTATTTGTTTGATCAGTAATAATTACTGCTTTATTATTATTATTATCATTACCAGTACTAGCTGGAGCTATTACTATATTATTAACTGATCGAAATTTAAATACTTCATTTTTTGATCCAGCAGGAGGAGGAGATCCAATTCTTTATCAACATTTATTT
>IBIDP129-19|Periscepsia carbonaria|COI-5P|MN868874
TACTTTATATTTTATTTTCGGAGCTTGATCAGGAATAATTGGAACTTCATTAAGAATATTAATTCGAGCAGAATTAGGTCATCCAGGAGCTTTAATTGGAAATGATCAAACTTATAATGTAATTGTTACAGCTCACGCATTTATTATAATTTTTTTTATAGTTATACCTATTATAATTGGAGGATTTGGAAATTGATTAGTTCCTTTAATACTAGGAGCTCCAGATATAGCTTTCCCTCGAATAAATAATATAAGATTTTGATTATTACCACCTTCTTTACTTTTACTATTAGCAAGTAGTATAGTAGGAAATGGAGCTGGTACGGGTTGAACAGTTTACCCTCCTTTATCTTCTAATATTGCTCATGAAGGAGCTTCTGTAGATTTAGCAATTTTTTCATTACACTTAGCTGGAATTTCTTCTATTTTAGGAGCTGTAAATTTTATTACTACAGTTATTAATATACGATCAACAGGTATTACATTCGACCGTATACCATTATTTGTTTGATCTGTAGTTATTACAGCATTATTACTTTTATTATCTTTACCTGTTTTAGCTGGAGCTATTACTATATTATTAACAGATCGAAATTTAAATACTTCATTTTATGACCCTGCAGGAGGAGGAGACCCAATTCTATATCAACATTTATTT
>IBIDP135-19|Drosophila suzukii|COI-5P|MN868747
AACTCTATATTTTATTTTTGGAGCTTGAGCCGGAATAGTGGGAACATCTCTAAGAATTTTAATTCGAGCTGAATTAGGTCATCCAGGAGCATTAATTGGAGATGACCAAATTTATAACGTAATTGTTACCGCACATGCTTTTATTATAATTTTTTTTATAGTAATACCAATTATAATTGGAGGATTTGGAAATTGATTAGTTCCATTAATATTAGGGGCCCCAGATATAGCATTCCCACGAATAAATAATATAAGATTTTGACTACTGCCTCCTGCTCTTTCTTTATTATTAGTGAGAAGAATGGTTGAAAACGGAGCTGGAACAGGTTGAACTGTTTACCCACCTCTTTCTGCTGGAATTGCTCATGGAGGGGCTTCAGTAGATTTAGCAATTTTTTCATTACATCTAGCCGGAATTTCTTCAATTTTAGGAGCTGTAAATTTTATTACAACTGTAATTAATATACGATCAACGGGTATTACATTAGACCGAATACCTTTATTTGTTTGATCAGTTGTAATTACTGCTTTATTACTTTTATTATCATTACCAGTACTAGCTGGAGCTATTACTATATTATTAACAGATCGAAATTTAAATACCTCATTTTTTGACCCGGCAGGAGGAGGGGATCCTATTTTATATCAACATTTATTT
>IBIDP137-19|Microphthalma europaea|COI-5P|MN868892
AACTTTATATTTTATCTTTGGAGCTTGATCAGGAATAATTGGTACTTCTTTAAGAATTTTAGTCCGTGCTGAATTAGGGCACCCTGGTGCATTAATTGGAGATGATCAAATTTATAATGTAATTGTAACAGCACATGCTTTTATTATAATTTTTTTTATAGTTATACCTATTATAATTGGAGGATTTGGTAATTGATTAGTGCCATTAATATTAGGAGCTCCAGATATAGCATTTCCTCGAATAAATAATATAAGTTTTTGATTATTACCTCCTGCATTAACTTTATTATTATTAGGAAGTATAACAAATAACGGGGCTGGTACAGGATGAACCGTTTATCCTCCATTATCATCTAATATTGCACATGAAGGAGCTTCTGTAGATTTAACGATTTTTTCTTTACATTTAGCCGGAATTTCGTCAATTTTAGGAGCTGTAAATTTCATTACTACAGTAATTAATATACGTTCAATTGGAATTACTTTAGATCGAATACCTTTATTTGTATGATCAGTAGCAATTACAGCTTTATTACTTTTATTATCATTACCAGTTTTAGCAGGTGCAATTACTATATTATTAACAGATCGAAATTTTAATACTTCATTTTTTGATCCAGCCGGAGGAGGTGATCCAATTCTTTACCAACATTTATTT
>IBIDP138-19|Peleteria rubescens|COI-5P|MN868712
AACATTATATTTTATTTTTGGAGCATGATCAGGAATAGTAGGAACATCTCTAAGAATTTTAGTACGAGCTGAATTAGGACATCCAGGTGCATTAATTGGAGATGATCAAATTTATAATGTAATCGTTACAGCTCATGCATTTGTAATAATTTTTTTTATAGTAATACCAATTATAATTGGAGGATTTGGAAATTGATTAGTGCCCTTAATATTAGGAGCTCCTGATATGGCTTTCCCCCGAATAAATAATATAAGTTTTTGACTTTTACCTCCAGCATTAACTTTATTGCTTGTGAGAAGAATAGTGGAAAATGGAGCTGGAACAGGATGAACTGTTTACCCTCCTTTATCATCTAATATTGCTCATGGAGGAGCTTCTGTTGATTTAACAATTTTTTCTTTACATTTAGCAGGAATTTCTTCTATTCTAGGAGCAGTAAATTTTATTACAACTGTAATTAATATACGATCGGTAGGAATTACATTTGATCGAATACCTTTATTTGTATGATCAGTAGTTATTACAGCATTATTATTACTTTTATCATTACCAGTATTAGCTGGAGCTATTACTATATTATTAACAGATCGAAATTTAAATACTTCATTTTTTGATCCTGCAGGAGGAGGAGATCCTATTTTATATCAACATTTATTT
>IBIDP139-19|Toxoneura muliebris|COI-5P|MN868815
AACCTTATATTTTATTTTTGGTGCTTGAGCAGGAATAGTTGGAACATCATTAAGAATTTTAATTCGTGCCGAATTAGGTCATCCTGGAGCTTTAATTGGTGATGATCAAATTTATAACGTAATTGTTACAGCTCATGCATTTGTAATAATTTTCTTCATAGTTATACCTATTATAATGGGAGGATTTGGAAACTGATTAGTTCCTTTAATGCTTGGAGCCCCCGATATAGCATTTCCTCGAATAAATAATATAAGTTTTTGACTTCTACCTCCATCACTTACTTTACTTTTAGTAAGTAGTATAGTAGAAAACGGAGCTGGAACAGGATGAACAGTTTATCCCCCTCTTTCTTCAGTAATTGCTCATGGTGGTGCTTCCGTAGATTTAGCAATTTTTTCTCTTCATTTAGCAGGAATATCTTCTATTTTAGGAGCTGTAAATTTTATCACTACAGTAATTAATATACGATCAACTGGAATTACTTTTGATCGAATACCTTTATTTGTTTGATCTGTAGTAATTACGGCTTTTCTTCTTTTACTTTCTTTACCTGTTTTAGCCGGTGCTATTACTATATTATTAACAGACCGAAATTTAAATACTTCATTTTTTGATCCAGCAGGAGGAGGAGACCCAATTCTTTACCAACATTTATTT
>IBIDP142-19|Coenosia attenuata|COI-5P|MN868730
AACTTTATATTTTATTTTCGGAGCTTGATCCGGAATAGTAGGAACATCATTAAGTATTTTAATTCGAGCTGAATTAGGACATCCTGGTGCTTTAATTGGTGATGACCAAATTTATAATGTAATTGTTACTGCTCATGCATTTATTATAATTTTTTTTATAGTTATACCAATTATAATTGGAGGATTTGGAAATTGACTAGTCCCTTTAATATTAGGAGCCCCAGATATAGCCTTTCCTCGAATGAATAATATAAGTTTCTGACTTTTACCACCAGCTTTAACTTTACTACTAGCCAGTAGTATAGTGGAAAACGGAGCTGGAACTGGTTGAACAGTTTACCCTCCTCTATCATCTAATATCGCTCATGGAGGAGCTTCTGTTGATTTAGCTATTTTTTCACTACATTTAGCAGGAATTTCTTCAATTTTAGGAGCTGTAAATTTTATTACTACTGTAATTAATATACGATCAACAGGAATTACTTTCGATCGAATACCTTTATTTGTATGATCAGTAGCTATTACAGCTCTATTATTATTATTATCTTTACCTGTATTAGCAGGAGCTATTACAATATTATTAACAGATCGAAATTTAAATACTTCTTTTTTCGACCCTGCTGGAGGAGGAGACCCAATTTTATATCAACACTTATTT
>IBIDP143-19|Trichocera saltator|COI-5P|MN868729
AACTTTATACTTTATTTTTGGAGCTTGATCTGGTATAATCGGAACCTCCCTAAGAATATTAATTCGAGCTGAATTAGGTCATCCTGGTGCTTTAATTGGTGATGATCAAATTTATAACGTTATTGTAACAGCTCATGCTTTTGTTATAATTTTTTTTATAGTAATACCTATTATAATTGGAGGGTTTGGTAATTGATTAGTGCCTTTGATACTAGGGGCTCCTGATATAGCCTTTCCCCGAATAAATAATATAAGTTTTTGAATATTGCCCCCTTCTTTAACCCTTCTTCTATCAAGAAGAATGGTTGAAAACGGAGCTGGTACAGGATGAACTGTATACCCTCCCCTATCTTCTGGAATTGCTCATGCTGGTGCTTCTGTTGATCTAGCAATTTTTTCACTACACTTAGCCGGGATCTCTTCTATTTTAGGGGCTGTAAATTTTATTACTACTGTAATTAATATGCGATCTACAGGAATTACTTTAGACCGAATACCTTTATTTGTATGATCTGTTGTAATTACAGCAGTTCTTTTATTATTATCTCTTCCAGTTTTAGCCGGAGCTATCACAATACTTTTAACAGACCGAAATTTAAATACGTCTTTCTTTGACCCTGCTGGAGGAGGAGACCCTATTTTATACCAACATTTGTTT
>IBIDP144-19|Anthomyia pluvialis|COI-5P|MN868865
TACTTTATATTTTATTTTTGGAGCTTGAGCAGGAATAGTAGGAACTTCTTTAAGTATCCTAATTCGAGCAGAATTAGGACATCCTGGTGCTTTAATTGGAAATGATCAAATTTATAATGTTATTGTAACAGCTCATGCTTTTATTATAATTTTTTTTATAGTAATACCTATTATAATTGGAGGATTTGGAAATTGATTAGTCCCACTAATATTAGGAGCTCCTGATATAGCTTTCCCACGAATAAATAATATAAGTTTTTGGCTTTTACCTCCCGCATTAACTTTATTGTTAGTAAGTAGTATAGTAGAAAACGGAGCTGGAACAGGATGAACTGTTTATCCTCCTTTGTCTTCAAATATCGCTCATGGAGGAGCTTCTGTTGATTTAGCTATTTTTTCTCTTCATTTAGCAGGAATTTCATCAATTCTAGGAGCTGTAAATTTTATTACAACTGTAATTAATATGCGAGCAACAGGAATTACTTTTGACCGAATACCTTTATTTGTATGATCAGTAGTAATTACTGCATTATTATTATTACTTTCTTTACCAGTTTTAGCTGGAGCTATTACAATATTATTAACAGACCGAAATTTAAATACATCATTTTTTGACCCTGCAGGAGGAGGAGATCCAATTTTATATCAACATTTATTT
>IBIDP145-19|Micropeza lateralis|COI-5P|MN868896
AACTTTATATTTTATTTTTGGAGCTTGAGCAGGAATAGTAGGTACTTCTTTAAGAATTTTAATTCGAGCAGAATTAGGACATCCTGGAGCATTAATTGGTGATGATCAGATTTATAATGTAATTGTAACTGCACATGCTTTTGTAATAATTTTTTTTATAGTAATACCAATTATAATTGGAGGATTTGGAAATTGACTAGTACCCCTAATACTAGGAGCCCCAGATATAGCTTTTCCTCGAATAAATAATATAAGATTTTGATTATTACCTCCTGCTTTAACTCTTTTATTAGTTAGTAGTATAGTAGAAAACGGAGCAGGAACAGGATGAACAGTTTACCCTCCATTATCATCTATAATTGCACATGAAGGAGCTTCTGTAGATTTAGTAATTTTCTCTTTACATTTAGCAGGAATTTCTTCTATTTTAGGTGCTGTAAATTTTATTACAACTGTAATTAATATACGATCAACAGGAATTTCTTTAGACCGAATACCTCTATTTGTGTGATCAGTAGTTATTACTGCATTTCTACTTTTATTATCATTACCTGTTTTAGCAGGAGCTATTACAATATTATTAACAGATCGAAATCTTAATACTTCATTTTTTGACCCCGCAGGAGGAGGTGATCCAATTTTATACCAACACTTATTT
>IBIDP149-19|Oplisa aterrima|COI-5P|MN868880
TACTTTATACTTTATTTTTGGAGCTTGATCTGGAATAATTGGAACTTCTTTAAGAATTTTAATTCGAGCCGAATTAGGACATCCAGGAGCACTAATTGGAGATGATCAAATTTATAATGTAATTGTTACAGCTCATGCTTTTATTATAATTTTTTTTATAGTAATACCAATCATAATTGGAGGATTTGGAAATTGATTAGTTCCTTTAATATTAGGAGCTCCAGATATAGCATTCCCTCGAATAAACAATATAAGTTTTTGACTTTTACCTCCTGCTTTAACTTTACTATTAGTAAGAAGTATAGTAGAAAACGGAGCTGGTACAGGATGAACTGTTTACCCACCTTTATCATCTAATATTGCTCATGGAGGAGCTTCTGTTGACTTAGCTATTTTTTCTTTACATTTAGCAGGAATTTCATCAATTTTAGGAGCTGTAAATTTTATTACAACTGTTATTAATATACGATCAACAGGAATTACTTTTGACCGAATACCTTTATTTGTTTGATCAGTTGTAATTACAGCTTTATTACTTTTATTATCCCTTCCAGTATTAGCAGGAGCTATCACTATATTACTAACGGATCGAAATTTAAATACTTCATTTTTTGACCCTGCAGGAGGTGGAGACCCAATTTTATACCAACATTTATTT
>IBIDP153-19|Pyrellia vivida|COI-5P|MN868740
AACATTATATTTTATTTTTGGAGCATGATCTGGAATAATCGGAACTTCATTAAGAATCTTAATTCGAGCTGAATTAGGACATCCAGGAGCTTTAATTGGTGATGATCAAATTTATAATGTAATTGTAACAGCTCATGCTTTTATTATAATTTTTTTTATGGTTATACCTATTATAATTGGAGGATTTGGAAATTGATTAGTTCCTCTTATATTAGGAGCTCCAGATATAGCTTTTCCACGGATAAATAATATAAGTTTCTGGTTATTACCTCCTGCTTTAACCCTCCTTCTCGTGAGAAGTATAGTGGAAAAGGGAGCTGGGACCGGATGAACAGTTTACCCACCTCTGTCATCTAATATTGCCCATGGAGGAGCTTCAGTTGATTTAGCTATTTTTTCACTACATTTAGCAGGAATTTCATCAATTTTAGGAGCTGTTAATTTTATTACTACAGTTATTAATATACGAGCAACAGGAATTACATTTGATCGAATACCTTTATTTGTGTGATCAGTTGTTATTACTGCATTATTACTATTACTTTCTCTTCCAGTCTTAGCAGGTGCAATTACTATATTATTAACAGACCGAAATTTAAATACTTCATTTTTTGACCCAGCTGGAGGAGGAGATCCTATTTTATACCAACATTTATTT
>IBIDP154-19|Musca tempestiva|COI-5P|MN868796
TACTTTATATTTTATTTTTGGAGCATGATCTGGTATAGTAGGAACTTCATTAAGAATTTTAATTCGAGCTGAATTAGGACACCCTGGTGCACTAATTGGTGATGATCAAATTTATAATGTTATTGTAACAGCTCATGCTTTTATTATAATTTTCTTTATAGTAATACCTATTATAATTGGAGGATTTGGTAATTGATTAGTTCCTTTAATGTTAGGAGCTCCTGATATAGCATTTCCTCGAATAAATAATATAAGTTTCTGATTACTACCTCCTGCTTTAACTTTATTATTAGTTAGAAGTATAGTAGAAAAGGGAGCTGGAACAGGATGAACTGTTTACCCACCTTTATCTTCAATTATTGCCCATGGAGGAGCTTCTGTAGATTTAGCTATTTTTTCTTTACATTTAGCAGGAATTTCTTCAATTTTAGGAGCAGTAAATTTTATTACTACAGTTATTAATATACGAGCTACTGGAATTACATTTGATCGAATACCTTTATTCGTATGATCAGTTGTAATTACAGCTTTATTACTTCTTTTATCACTTCCAGTACTAGCTGGAGCTATTACTATATTATTAACAGACCGAAATTTAAATACTTCATTCTTTGACCCAGCTGGAGGAGGAGATCCTATTCTTTATCAACACTTATTT
>IBIDP157-19|Polyodaspis sulcicollis|COI-5P|MN868842
AACCTTATATTTTATATTCGGAGCATGAGCAGGAATAGTAGGAACATCATTAAGAATTTTAATTCGAGCTGAATTAGGACATCCTGGAGCTTTAATTGGTGACGATCAAATTTATAATGTAATTGTTACTGCTCATGCATTCGTAATAATTTTCTTTATAGTTATACCTATTATAATTGGAGGATTTGGAAATTGATTAGTTCCTTTAATGTTGGGAGCTCCTGATATAGCATTCCCTCGAATAAATAATATAAGTTTTTGATTATTACCCCCTTCTTTAACTTTATTAATGGCAAGCAGAATAGTAGAAAACGGAGCTGGAACAGGTTGAACTGTTTACCCCCCTCTCTCATCTATTATTGCTCATGGAGGAGCTTCAGTTGATTTAGCTATTTTTTCCCTTCACTTAGCTGGAGTATCATCTATTTTAGGAGCAGTAAATTTTATTACTACAGTAATTAATATACGATCGACAGGAATTACTTTTGATCGAATACCTTTATTTGTTTGATCTGTAGTAATTACTGCTCTTTTATTATTGTTATCATTGCCTGTTTTAGCCGGAGCTATTACAATATTATTAACAGATCGAAATTTAAATACTTCATTCTTTGATCCAGCAGGTGGAGGAGATCCAATTTTATACCAACATTTATTT
>IBIDP162-19|Trachysiphonella ruficeps|COI-5P|MN868767
AACATTATATTTTATATTCGGAGCATGAGCTGGAATAGTAGGAACTTCATTAAGAATTTTAATTCGAGCAGAATTAGGTCATCCTGGTGCATTAATTGGAGATGATCAAATTTATAATGTAATTGTTACTGCTCATGCTTTTGTAATAATTTTCTTCATAGTAATACCTATTATAATTGGAGGATTTGGAAATTGATTAGTTCCCTTAATACTAGGAGCACCAGATATAGCATTTCCTCGAATAAATAATATAAGATTTTGATTATTACCTCCTTCATTAACTTTATTAATGGCTAGAAGTATAGTAGAAAACGGAGCTGGTACAGGATGAACTGTTTATCCACCCCTTTCTTCAATTATTGCTCATGGAGGAGCTTCAGTTGATCTAGCAATTTTTTCATTACATTTAGCTGGAGTATCTTCAATTTTAGGGGCTGTAAATTTTATTACTACTGTAATTAATATACGATCAAAAGGAATTACATTTGATCGAATACCTTTATTTGTATGATCAGTAGCAATTACTGCTCTATTATTATTATTATCTTTACCAGTATTAGCAGGAGCTATTACTATATTATTAACTGATCGAAATTTAAATACTTCATTTTTTGATCCAGCTGGAGGAGGTGATCCTATTTTATACCAACATTTATTT
>IBIDP165-19|Cylindromyia rufipes|COI-5P|MN868879
AACATTATATTTTATTTTTGGAGCTTGATCCGGAATAGTAGGTACTTCATTAAGAATTCTAATTCGAACTGAATTAGGTCATCCTGGAGCTTTAATTGGTGATGATCAAATTTATAATGTAATTGTAACAGCTCATGCCTTTATTATAATTTTTTTTATAGTAATACCTATTATAATTGGAGGATTTGGAAACTGATTAGTACCTTTAATATTAGGAGCCCCAGATATAGCATTTCCACGAATAAATAATATAAGATTTTGATTACTTCCTCCATCATTAATATTATTATTAGCTGGCAGCATAGTAGAAAACGGAGCTGGTACGGGATGAACTGTATACCCCCCTCTATCAGCAAATATTGCTCACAGAGGATCTTCAGTTGACTTAACTATTTTTTCTTTACACCTAGCAGGAATTTCATCAATTTTAGGAGCTGTAAATTTTATTACTACAGTTATTAATATACGATCAACAGGAATTACATTCGATCGTATACCTTTATTTGTTTGATCAGTTGTAATCACTGCTTTATTACTTCTATTATCTCTACCAGTTCTAGCTGGAGCTATCACAATATTATTAACAGATCGAAATTTAAATACTTCTTTTTTTGATCCAGCAGGAGGAGGAGATCCAATTCTTTACCAACATTTATTT
>IBIDP166-19|Haematopota ocelligera|COI-5P|MN868869
AACATTATATTTTATTTTTGGAGCATGAGCCGGAATAATTGGAACTTCATTAAGTATTTTAATTCGAGCAGAATTAGGACACCCAGGATCTTTAATTGGAGATGACCAAATTTATAATGTAATTGTAACTGCACATGCTTTTGTAATAATTTTCTTTATAGTTATACCTATTATAATTGGAGGATTTGGAAATTGATTAGTCCCATTAATATTAGGAGCCCCTGATATAGCATTTCCTCGAATAAATAATATAAGTTTTTGACTTTTACCTCCATCATTAACTCTTTTATTAGCAAGTTCTATAGTAGAAAACGGAGCTGGAACTGGTTGAACAGTATACCCCCCATTATCAGCTGCAATTGCCCATGGAGGTGGATCAGTTGATTTAGCAATTTTTTCTTTACATCTTGCAGGAATTTCTTCTATTTTAGGAGCAGTTAATTTTATTACTACTGTAATTAATATACGATCAACAGGAATTACATTTGACCGAATACCATTATTTGTGTGAGCTGTAGTAATTACAGCTATTCTTTTATTATTATCTTTACCAGTATTAGCTGGTGCTATTACTATACTTTTAACAGATCGAAATTTAAATACATCTTTTTTTGACCCTGCTGGAGGAGGAGACCCTATTTTATACCAACATTTATTT
>IBIDP169-19|Ulidia apicalis|COI-5P|MN868724
AACTTTATATTTCATCTTCGGAGCTTGAGCAGGAATAGTAGGAACCTCTCTTAGAATTTTAATCCGAGCAGAACTAGGTCACCCTGGAGCCCTAATTGGAGATGACCAAATTTATAACGTAATCGTTACAGCACACGCATTTGTAATAATTTTTTTCATAGTTATACCAATTATAATTGGTGGATTCGGTAATTGACTTGTTCCCTTGATACTTGGAGCCCCAGACATAGCTTTCCCTCGGATAAATAATATAAGTTTCTGACTTCTTCCTCCTTCTTTAACCCTCCTGTTAGTAAGTAGTATAGTAGAAAACGGAGCAGGTACAGGATGAACCGTGTACCCTCCGTTATCATCAGTAATTGCTCATGGAGGAGCTTCCGTTGATTTAGCTATCTTCTCCTTACACTTAGCCGGAGTTTCATCAATTTTAGGAGCAGTAAATTTCATCACTACAGTGATTAATATACGATCAACAGGAATTACATTTGATCGTATACCTTTATTCGTTTGATCTGTTGTAATTACTGCTCTACTCTTACTACTTTCCCTACCAGTTCTAGCTGGAGCTATTACTATATTATTAACTGACCGAAACTTAAATACATCCTTTTTTGACCCTGCCGGAGGAGGGGACCCTATTTTGTATCAACACCTATTT
>IBIDP170-19|Syritta pipiens|COI-5P|MN868760
AACTTTATATTTTATATTTGGAACTTGAGCAGGATTAGTAGGAACTTCCTTAAGAATTCTTATTCGAGCCGAATTAGGTCACCCTGGAGCTTTAATTGGAGATGACCAAATTTATAACGTAATTGTTACTGCTCATGCTTTTGTTATAATTTTTTTTATAGTTATACCAATTATAATTGGAGGATTTGGAAATTGACTAGTTCCTTTAATACTGGGAGCACCAGATATAGCATTTCCACGAATAAATAATATAAGTTTTTGACTTTTACCTCCTTCTTTAACTTTATTATTAGTAAGTAGTATAGTAGAAAACGGAGCAGGAACAGGATGAACAGTATATCCTCCTTTGTCAGCAGGAATTGCTCATAGTGGAGCTTCTGTAGATCTAGCAATCTTTTCTTTACATTTAGCAGGAATATCATCCATTTTAGGAGCTGTAAATTTTATTACAACTGTAATTAACATACGAGCAGCAGGAATAACATATGATCGAATACCTTTATTTGTATGATCAGTAGTTATTACAGCTCTTCTTCTTTTATTATCATTGCCAGTTTTAGCAGGTGCAATTACAATACTTTTAACTGATCGAAATTTAAATACTTCATTTTTCGACCCTGCTGGAGGAGGAGACCCAATTCTTTACCAACATTTATTT
>IBIDP174-19|Elachiptera megaspis|COI-5P|MN868883
AACATTATATTTTATATTTGGGGCTTGAGCTGGAATAGTAGGTACATCATTAAGTATTCTAATTCGAGCTGAATTAGGTCACCCAGGTGCTTTAATTGGAGATGATCAAATTTATAATGTAATTGTTACTGCTCATGCTTTTGTAATAATTTTTTTTATAGTAATACCTATTATAATTGGAGGATTTGGAAATTGATTAGTTCCACTAATATTAGGAGCTCCTGATATAGCATTTCCTCGAATAAATAATATAAGTTTTTGATTATTACCACCTTCATTGACTTTATTAATGGCTAGAAGTATAGTTGAAAACGGAGCTGGAACAGGATGAACAGTTTATCCTCCATTATCTTCTATTATTGCTCATGGAGGTGCTTCAGTTGATTTAGCTATTTTTTCATTACATTTAGCTGGAGTATCTTCAATTTTAGGAGCTGTAAATTTTATTACAACTGTTATTAATATACGATCAACAGGTATTTCATTTGATCGAATACCATTATTTGTATGATCAGTAGTAATTACAGCATTATTATTACTTTTATCATTACCAGTATTAGCTGGAGCTATTACTATATTATTAACAGATCGAAATTTAAATACTTCATTTTTTGATCCAGCAGGTGGAGGAGATCCAATTTTATATCAACATTTATTT
>IBIDP176-19|Thaumatomyia elongatula|COI-5P|MN868713
AACTTTATATTTTATATTTGGAGCATGAGCTGGAATAGTAGGTACTTCTTTAAGAATTCTAATTCGAGCTGAATTAGGACATCCAGGAGCCTTAATTGGTGATGACCAAATTTACAATGTAATTGTTACAGCACATGCATTTGTAATAATTTTTTTTATAGTAATACCTATTATAATTGGAGGATTTGGTAATTGATTAGTTCCATTAATGCTTGGAGCACCAGATATAGCATTTCCTCGAATAAATAATATAAGATTTTGAATACTTCCTCCTTCTTTAACATTATTAATAGCAAGAAGAATAGTTGAAAATGGAGCTGGTACAGGATGAACTGTATACCCCCCACTTTCTTCAATTATTGCTCATGGAGGAGCTTCTGTTGATTTAGCTATTTTTTCTTTACATTTAGCAGGAATTTCTTCAATTTTAGGTGCAGTAAATTTTATTACTACAGTTATTAATATACGATCAACAGGAATTACATTTGACCGAATACCCTTATTTGTTTGATCAGTAGTAATTACTGCTTTATTACTTCTATTATCTTTACCAGTATTAGCAGGAGCTATTACTATACTTTTAACTGATCGAAATTTAAATACTTCATTTTTTGATCCAGCAGGAGGAGGAGATCCTATTCTTTATCAACATTTATTT
>IBIDP181-19|Periscelis fugax|COI-5P|MN868913
CACACTATATTTTCTATTCGGAGCTTGAGCAGGAATAGTAGGAACTTCCCTAAGAATTTTAATTCGAGCTGAATTAGGACATCCTGGAGCTCTAATTGGAGATGATCAAATTTATAATGTAATTGTTACTGCCCATGCTTTTGTAATAATTTTTTTCATGGTTATACCCATTATAATCGGTGGATTTGGAAATTGACTAGTACCCCTAATACTAGGAGCCCCAGATATAGCCTTTCCCCGAATAAATAATATAAGTTTTTGATTACTACCTCCCTCTTTAACCCTGCTATTAGTAAGAAGAATAGTGGAAAATGGGGCTGGTACAGGATGAACTGTTTACCCCCCACTTTCTTCTACTATTGCACACAGAGGAGCTTCTGTTGATTTAGCAATTTTTTCTTTACATTTAGCTGGGGTATCCTCCATTTTGGGAGCTGTAAATTTTATCACCACCGTAATTAATATGCGATCTACAGGGATATCTTTTGATCGAATACCTCTTTTTGTATGATCTGTGGTAATTACAGCCTTTTTACTATTATTATCACTACCAGTACTAGCCGGTGCAATTACTATATTATTAACTGATCGAAATTTTAACACATCTTTTTTCGATCCGGCGGGAGGAGGTGATCCTATTTTATATCAACATTTATTT
>IBIDP184-19|Lamprolonchaea smaragdi|COI-5P|MN868805
AACATTATATTTTATATTTGGTGCTTGAGCTGGAATAGTAGGAACTTCTTTAAGAATCCTTATTCGAGCAGAACTAGGACATCCTGGTGCTCTTATTGGAGATGACCAAATTTACAATGTAATTGTAACAGCTCATGCTTTTGTAATAATTTTTTTTATAGTAATACCAATTATAATTGGTGGGTTTGGAAATTGACTAGTGCCTTTAATATTAGGAGCCCCTGATATAGCATTTCCTCGAATAAATAATATAAGATTTTGATTACTCCCTCCATCACTTACTCTTTTATTAGTAAGTAGTATAGTAGAAAACGGAGCTGGGACAGGATGAACAGTATACCCTCCTCTTTCTTCTGTAATTGCTCATGGAGGAGCATCTGTTGATTTAGCAATTTTCTCCCTTCATTTAGCTGGAGTTTCATCAATTTTAGGAGCAGTAAATTTCATTACTACTGTAATTAATATACGAGCAACAGGAATTACTTTTGATCGAATACCATTATTTGTATGATCAGTTGTAATTACAGCGTTATTACTTTTATTATCATTGCCTGTATTAGCTGGAGCTATTACAATACTTTTAACAGACCGAAACCTTAATACTTCTTTCTTTGACCCAGCAGGAGGAGGTGACCCAATTTTATACCAACATTTATTT
>IBIDP371-19|Phasia pusilla|COI-5P|MN868790
TACTCTATATTTTATTTTTGGAGCTTGATCTGGAATAGTAGGTACCTCATTAAGTATTTTAATCCGAGCTGAATTAGGTCACCCCGGTTCATTAATTGGAGATGATCAAATTTATAATGTAATTGTTACAGCTCATGCTTTTATTATAATTTTCTTTATAGTAATACCTATTATAATTGGAGGATTTGGAAATTGATTAGTTCCATTAATATTAGGAGCCCCAGATATAGCTTTCCCACGAATAAACAATATAAGTTTCTGATTATTACCTCCTGCATTAACTTTACTTTTAATAAGTAGTATAGTCGAAAATGGAGCTGGAACAGGATGAACTGTTTACCCTCCATTATCTTCTAATATTGCTCATGGAGGAGCTTCTGTTGATTTAGCTATTTTTTCATTACATTTAGCAGGAATTTCATCTATTCTAGGAGCTGTAAATTTTATTACAACAGTAATTAATATACGATCAACAGGTATTACATTTGATCGAATACCTTTATTTGTCTGATCAGTTGTAATTACAGCTTTATTACTTTTATTATCTTTACCAGTATTAGCTGGTGCTATCACTATACTATTAACGGATCGAAATTTAAATACTTCATTTTTCGACCCAGCAGGAGGAGGTGATCCTATTTTATACCAACATTTATTT
>IBIDP373-19|Ulidia apicalis|COI-5P|MN868860
AACTTTATATTTCATCTTCGGAGCTTGAGCAGGAATAGTAGGAACCTCTCTTAGAATTTTAATCCGAGCAGAACTAGGCCACCCTGGAGCCCTAATTGGAGATGACCAAATTTATAACGTAATCGTTACAGCACACGCATTTGTAATAATTTTTTTCATAGTTATACCAATTATAATTGGTGGATTCGGTAATTGACTTGTTCCCTTGATACTTGGAGCCCCAGACATAGCTTTCCCTCGGATAAATAATATAAGTTTCTGACTTCTTCCTCCTTCTTTAACCCTCCTGTTAGTAAGTAGTATAGTAGAAAACGGAGCAGGTACAGGATGAACCGTGTACCCTCCGTTATCATCAGTAATTGCTCATGGAGGAGCTTCCGTTGATTTAGCTATCTTCTCCTTACACTTAGCCGGAGTTTCATCAATTTTAGGAGCAGTAAATTTCATCACTACAGTGATTAATATACGATCAACAGGGATTACATTTGATCGTATACCTTTATTCGTTTGATCTGTTGTAATTACTGCTCTACTCTTACTACTTTCCCTACCAGTTCTAGCTGGAGCTATTACTATATTATTAACTGACCGAAACTTAAATACATCCTTTTTTGACCCTGCCGGAGGAGGGGACCCTATTTTGTACCAACACCTATTT
>IBIDP375-19|Tachina lurida|COI-5P|MN868845
AACTTTATATTTTATTTTTGGTGCATGAGCCGGAATAGTAGGAACATCTTTAAGAATTTTAGTACGAGCTGAATTAGGACATCCAGGTGCACTTATTGGAGATGATCAAATTTATAATGTAATTGTTACAGCTCATGCATTTGTAATAATTTTTTTTATAGTAATACCAATTATAATTGGAGGATTTGGAAATTGATTAGTTCCTCTAATATTAGGAGCACCTGATATAGCTTTTCCTCGAATAAATAATATAAGTTTTTGACTTTTACCACCTGCATTAACTTTATTACTCGTAAGTAGTATAGTAGAAAATGGAGCTGGAACAGGATGAACTGTTTACCCACCTCTATCTTCTAATATTGCTCATGGAGGTGCTTCTGTTGATTTAGCCATTTTTTCTTTACATTTAGCTGGAATTTCTTCTATTTTAGGTGCTGTAAATTTTATTACAACAGTTATTAATATACGATCTACAGGAATTACTTTTGATCGAATACCTCTATTTGTATGATCAGTAGTTATTACAGCATTATTATTACTTTTATCATTACCAGTATTAGCAGGAGCTATTACTATATTATTAACAGATCGAAATTTAAATACATCATTTTTTGATCCAGCAGGAGGAGGAGATCCTATTCTTTATCAACATTTATTT
>IBIDP380-19|Scathophaga stercoraria|COI-5P|MN868829
AACATTATACTTTATTTTCGGAGCATGATCCGGAATAATTGGAACTTCTTTAAGTATTCTAATTCGAGCTGAATTAGGACATCCTGGAGCATTAATTGGAGATGATCAAATCTATAATGTAATTGTAACAGCTCATGCTTTTATTATAATTTTTTTTATAGTAATACCAATTATAATTGGAGGATTTGGAAATTGATTAGTGCCTCTTATATTAGGTGCTCCTGATATAGCTTTCCCTCGAATAAATAATATAAGTTTTTGACTTTTACCACCAGCATTAACTTTATTGTTAGTAAGTAGTATAGTAGAAAACGGAGCTGGAACAGGATGAACTGTTTACCCTCCTTTATCTTCAAATATTGCTCATGGAGGAGCTTCTGTTGATTTAGCAATTTTTTCTCTTCATTTAGCAGGAATTTCATCTATTTTAGGAGCTGTAAATTTTATTACAACTGTAATTAATATACGATCAACAGGAATTACTTTTGATCGAATACCTTTATTTGTATGATCTGTAGTAATTACAGCTTTATTACTTTTATTATCTTTACCTGTTTTAGCTGGAGCTATTACTATACTATTAACAGATCGAAATCTTAATACATCATTTTTTGATCCAGCAGGAGGAGGAGACCCAATTCTATATCAACATTTATTT
>IBIDP382-19|Peribaea tibialis|COI-5P|MN868907
AACTTTATATTTTATTTTTGGAGCCTGATCAGGAATAGTAGGAACATCTTTAAGTATTTTAATTCGAACTGAATTAGGTCATCCAGGAGCATTAATTGGGGATGATCAAATTTATAATGTAATTGTTACAGCTCATGCCTTTATTATAATTTTTTTTATAGTTATACCAATTATAATTGGAGGATTTGGTAATTGATTAGTTCCTTTAATATTAGGAGCTCCAGATATAGCTTTCCCTCGAATAAATAATATAAGATTTTGATTACTTCCTCCTGCTTTAACCTTATTACTTATAAGAAGAATAATTGAAAATGGAGTTGGTACAGGATGAACTGTTTATCCTCCTCTATCTTCAAATATTGCTCATAGAGGACCATCTGTAGATTTAGGAATTTTCTCTCTACACCTTGCAGGAATTTCTTCTATTTTAGGAGCTGTTAATTTTATTACTACAGTTATTAATATACGATCTTCAGGAATTTCATTTGATCGAATACCTTTATTTGTTTGATCTGTAGCAATTACAGCTTTACTTTTACTTTTATCTTTACCAGTTTTAGCAGGAGCTATTACTATATTATTAACTGATCGAAATTTAAATACTTCATTTTTTGATCCAGCTGGTGGAGGAGATCCAATTTTATACCAACATTTATTT
>IBIDP383-19|Rivellia syngenesiae|COI-5P|MN868792
AACTTTATATTTTATTTTTGGTGCATGAGCTGGAATAGTAGGTACTTCACTTAGTATTTTAATTCGAGCTGAGCTAGGTCACCCAGGAGCTTTAATTGGTGATGATCAAATTTATAATGTAATTGTTACAGCTCACGCTTTTGTTATGATTTTCTTTATAGTAATACCAATTATAATTGGTGGATTTGGTAATTGACTTGTTCCATTAATATTAGGAGCTCCTGATATAGCTTTCCCACGTATAAATAATATAAGTTTTTGATTATTACCACCTTCTCTTACTCTACTTTTGATGAGTAGTATAGTAGAAAACGGAGCTGGTACAGGTTGAACAGTTTACCCTCCTTTATCTTCAGTTATTGCTCATGGAGGAGCTTCAGTTGATTTAGCTATTTTTAGTTTACATTTAGCAGGAATCTCTTCAATTTTAGGAGCAGTAAACTTTATTACTACAGTAATTAATATACGATCAACAGGAATTTCATTTGATCGAATACCTTTATTTGTATGAGCTGTTGTATTAACAGCATTATTATTACTACTATCTTTACCCGTTCTAGCTGGTGCAATTACTATATTATTAACTGATCGAAATCTTAATACATCCTTTTTTGACCCAGCAGGAGGTGGAGATCCAATTTTATACCAACATTTATTT
>IBIDP384-19|Calliopum simillimum|COI-5P|MN868801
AACTTTATATTTTTTGTTTGGAGCCTGAGCCGGAATAGTAGGGACATCTTTAAGAATTCTAATTCGAGCCGAATTAGGACACCCAGGAGCTTTAATTGGAGATGACCAAATTTATAACGTAATTGTTACTGCCCACGCCTTTGTCATGATTTTTTTCATAGTAATACCAATTATAATTGGTGGATTTGGAAATTGATTGGTCCCTTTAATATTAGGAGCCCCTGACATAGCCTTTCCTCGAATAAATAATATAAGATTTTGACTTTTACCCCCTTCCCTTACCTTACTTTTAGTGAGAAGAATAGTAGAAAACGGAGCGGGGACAGGTTGAACTGTTTACCCCCCGCTATCTTCTGGAATTGCCCATGGAGGGGCATCTGTTGATCTAGCAATTTTTAGCCTTCATTTGGCGGGGGTTTCCTCAATTTTAGGAGCTGTAAATTTTATTACTACAGTTATTAATATACGATCTACAGGAATTACTTTTGACCGAATACCTTTATTTGTTTGATCCGTAGTAATTACAGCTCTTTTATTACTCCTATCTCTTCCTGTATTAGCTGGAGCTATTACTATACTATTAACAGATCGTAATTTAAATACATCATTTTTTGATCCTGCTGGAGGGGGAGACCCAATTCTTTACCAACACTTATTT
>IBIDP385-19|Hippobosca equina|COI-5P|MN868873
AACATTATATTTTATTTTTGGTGCTTGATCAGGAATGATTGGTACATCATTAAGAATCTTAATCCGAGCAGAATTAGGTCATCCAGGATCATTAATTGGAAATGACCAAATTTATAACGTAATTGTTACAGCACATGCATTCATTATAATTTTTTTTATAGTAATACCAACAATTATTGGAGGATTTGGAAATTGATTAGTTCCTTTAATATTAGGAGCTCCTGATATAGCATTTCCACGAATAAATAATATAAGATTTTGATTACTTCCCCCAGCCTTAACATTATTGATTATAAGCAGATTAACAGAAAATGGAGCTGGAACTGGATGAACCGTTTACCCTCCTTTATCATCAACTATTGCACATAGAGGATCTTCAGTTGACTTAGCAATCTTTTCATTACATTTAGCCGGAATTTCATCAATTTTAGGAGCTGTAAATTTTATTACAACAGTAATTAATATACGATCAACAGGAATTACATTTGATCGAATACCTTTATTTGTATGATCAGTTTTAATTACAGCATTTTTATTATTATTATCTTTACCAGTTCTTGCTGGAGCAATCACTATATTATTAACTGATCGAAATTTTAATACTTCATTTTTTGACCCGGCAGGAGGAGGAGATCCAATTTTATATCAACATTTGTTT
>IBIDP389-19|Episyrphus balteatus|COI-5P|MN868738
AACCTTATATTTTCTATTCGGAGCTTGAGCTGGAATAGTAGGTACATCATTAAGTGTATTAATTCGTGCAGAACTTGGTCATCCTGGTGCTTTAATTGGAGATGATCAAATTTATAATGTAATTGTTACAGCCCATGCTTTTGTAATAATTTTTTTTATAGTAATACCTATTATAATTGGAGGATTTGGTAATTGATTAGTTCCATTAATATTAGGAGCTCCTGATATAGCATTTCCTCGTTTAAATAATATAAGTTTTTGACTATTACCTCCTTCTTTAACATTATTATTAGTAAGTAGTATAGTTGAAAATGGAGCTGGAACAGGTTGAACAGTATATCCTCCTCTTTCTGCTGGTATTGCTCATGGAGGAGCTTCTGTAGATTTAGCAATTTTTTCTTTACATTTAGCAGGAATATCATCAATTTTAGGAGCTGTAAATTTTATTACAACTGTTATTAATATACGATCTCATGGAATTACTTATGATCGAATACCTTTATTTGTTTGATCAGTTGTAATTACAGCATTATTATTACTTTTATCATTACCTGTATTAGCAGGAGCTATTACTATACTTTTAACTGATCGAAATTTAAATACTTCATTCTTTGATCCAGCAGGAGGAGGAGATCCAATTTTATATCAACATTTATTT
>IBIDP058-19|Campsicnemus scambus|COI-5P|MN868826
AACTTTATATTTTATTTTTGGTGCATGATCTGGAATAGTAGGTACTTCTTTAAGTATTATTATTCGAGCTGAATTAGGACACCCTGGAGCACTAATTGGAGATGACCAAATTTATAATGTAATTGTAACTGCCCATGCATTTATTATAATTTTTTTTATAGTTATACCAATTATAATTGGAGGATTTGGTAATTGACTTGTTCCTTTAATATTAGGAGCCCCTGATATAGCCTTCCCTCGAATAAATAATATAAGTTTTTGAATACTACCTCCTTCAATTACTCTTCTATTAGCTAGAAGAATAGTAGAAAACGGAGCTGGAACAGGATGAACTGTATATCCCCCCTTATCTGCAGGAATTGCTCATGGAGGAGCTTCTGTTGATTTAGCTATTTTCTCTCTTCATTTAGCTGGAATTTCTTCTATTTTAGGAGCTGTAAATTTTATTACAACAGTAATTAATATACGATCAACAGGTATTACTTTTGATCGAATACCATTATTTGTGTGATCTGTTGTTATTACTGCCATTTTATTATTACTTTCATTACCTGTTTTAGCTGGAGCTATTACTATACTTTTAACTGATCGAAATCTTAATACATCATTTTTTGACCCAGCTGGAGGAGGAGATCCAATTTTATACCAACATTTATTT
>IBIDP069-19|Discomyza incurva|COI-5P|MN868791
AACACTTTATTTTATTTTTGGAGCCTGAGCTGGAATAGTAGGAACTTCATTAAGAATTTTAATTCGAGCAGAATTAGGACATCCAGGTGCATTAATTGGTGATGATCAAATTTATAATGTAATTGTTACTGCTCATGCTTTTGTAATAATTTTTTTTATAGTAATACCAATTATAATTGGAGGATTTGGAAATTGATTAGTTCCACTAATATTAGGAGCTCCTGATATAGCTTTTCCTCGAATAAATAATATAAGTTTTTGATTATTACCGCCAGCTTTAACTTTATTATTAGTTAGAAGCATAGTTGATAACGGAGCTGGTACAGGATGAACTGTTTATCCTCCATTATCATCAGTAATTGCTCATGGAGGAGCTTCTGTTGATTTAGCTATTTTTTCTCTTCATTTAGCAGGAATTTCTTCTATTTTAGGAGCAGTAAATTTTATTACTACTGTAATTAATATACGATCAACTGGAATTACATTTGATCGAATACCATTATTTGTTTGATCAGTTGTAATTACTGCTTTATTACTACTTCTTTCATTACCAGTTTTAGCAGGAGCTATTACTATATTATTAACTGATCGAAATTTAAATACTTCATTTTTCGACCCAGCAGGAGGAGGAGATCCAATTTTATATCAACATTTATTT
>IBIDP070-19|Hemipenthes morio|COI-5P|MN868750
AACTTTATACTTTATTTTTGGGTCATGGGCCGGAATAGCAGGAACCTCCCTAAGAATTCTAGTCCGAGCTGAATTAGGTCACCCAGGATCACTAATTGGAGATGACCAAATTTATAACGTAATTGTTACTGCTCACGCCTTTATCATAATTTTCTTTATAGTAATACCTATCATAATTGGAGGATTTGGAAATTGGCTAGTTCCTTTAATATTAGGAGCCCCAGACATAGCCTTCCCACGAATAAATAATATAAGATTCTGAATACTTCCTCCATCTTTATCCCTCCTATTAGCTAGTTCAATAGTTGAAAATGGGGCAGGAACAGGGTGAACAGTATACCCGCCTCTTTCTGCAAGCATTGCCCATGGAGGTGCCTCTGTTGATCTGGCCATTTTTTCTCTTCATTTAGCCGGGATCTCGTCTATTCTTGGGGCTGTTAATTTTATTACAACAGTAATTAATATACGATCAACAGGAATTACTTTTGATCGTATACCTCTATTTGTATGATCTGTTGTAATTACTGCATTATTATTATTATTATCCCTACCAGTATTAGCAGGAGCTATTACTATATTATTAACAGATCGAAATTTAAATACTTCCTTCTTTGACCCTGCCGGGGGAGGAGATCCTATCCTATACCAGCATTTATTT
>IBIDP081-19|Psilopa nitidula|COI-5P|MN868770
TACTTTATATTTCATTTTTGGAGCTTGATCTGGTATAGTAGGAACTTCATTAAGAATTTTAATTCGAGCAGAATTAGGACACCCAGGTGCTTTAATTGGAGATGATCAAATTTATAATGTTATTGTAACTGCTCATGCATTTATTATAATTTTCTTTATGGTAATACCTATTATAATCGGAGGATTTGGAAATTGATTAGTTCCTTTAATATTAGGAGCACCAGATATAGCTTTTCCACGAATAAATAATATAAGATTTTGATTATTACCTCCTGCTTTAACTTTATTACTAGTAAGTAGTATAGTCGATAACGGGGCTGGAACAGGTTGAACTGTTTATCCTCCTCTATCATCTAATATTGCTCATAGAGGAGCTTCAGTTGATTTAGCTATTTTTTCTCTTCATTTAGCAGGAATTTCTTCTATTTTAGGAGCTGTAAATTTTATTACTACAGTTATTAATATACGATCAGTAGGAATTACTTTTGATCGAATACCATTATTTGTTTGATCTGTAGTAATTACAGCTTTATTATTATTATTATCACTACCCGTTTTAGCTGGAGCAATTACTATATTATTAACTGATCGAAATTTAAATACATCTTTTTTTGATCCTGCTGGAGGAGGAGATCCTATTTTATATCAACATTTATTT
>IBIDP107-19|Calliphora vomitoria|COI-5P|MN868755
TACTTTATACTTTATTTTTGGAGCTTGATCAGGAATGATTGGAACTTCATTAAGAATTTTAATTCGAGCTGAACTAGGGCATCCTGGAGCATTAATTGGAGATGATCAAATTTATAATGTAATTGTTACAGCTCATGCTTTTATTATAATTTTTTTTATAGTAATACCAATTATAATTGGAGGGTTTGGAAATTGATTAGTTCCTTTAATATTAGGAGCCCCAGATATAGCATTCCCTCGAATAAATAATATAAGTTTCTGACTTTTACCTCCTGCATTAACTTTACTATTAGTAAGTAGTATAGTAGAAAACGGAGCTGGAACTGGATGAACTGTTTATCCACCTTTATCTTCTAATATTGCACATGGAGGAGCTTCTGTTGATTTAGCTATTTTTTCTTTACATTTAGCAGGAATTTCTTCAATTTTAGGAGCTGTAAATTTTATTACTACAGTTATTAATATACGATCAACAGGTATTACCTTCGACCGAATACCATTATTTGTTTGATCAGTAGTAATTACAGCCTTATTACTTTTATTATCTTTACCAGTATTAGCAGGAGCTATTACTATATTATTAACAGATCGAAATCTTAATACTTCATTCTTTGACCCAGCAGGAGGAGGAGATCCAATTTTATACCAACACTTATTT
>IBIDP110-19|Phaonia pallida|COI-5P|MN868757
AACTTTATATTTTATTTTTGGATCTTGATCAGGAATAATTGGAACTTCATTAAGTATTTTAATTCGAACTGAATTAGGACATCCTGGAGCTTTAATTGGAGATGATCAAATTTATAATGTAATTGTAACAGCACATGCTTTTGTTATAATTTTTTTTATAGTAATACCTATTATAATTGGAGGATTTGGAAATTGATTAGTCCCTTTAATACTTGGAGCACCAGATATAGCATTTCCTCGAATAAATAATATAAGATTCTGACTTTTGCCCCCTGCTTTAATTTTATTACTAGTTAGTAGCATAGTAGAAAACGGAGCTGGAACTGGATGAACTGTTTACCCTCCACTATCTTCTAATATTGCTCATAGAGGAGCTTCAGTTGATTTAACAATTTTTTCCCTTCATTTAGCTGGAATTTCTTCGATTTTAGGAGCAGTAAATTTTATTACTACTGTAATTAATATACGATCAGTAGGTATTTCATTTGATCGAATACCTTTATTTGTATGATCTGTAGCAATTACAGCTTTATTATTACTTTTATCATTACCCGTACTAGCAGGAGCTATTACTATATTATTAACAGATCGAAATTTAAATACTTCATTTTTTGACCCTGCTGGAGGAGGAGACCCAATTCTATACCAACATTTATTT
>IBIDP113-19|Tachina magnicornis|COI-5P|MN868731
AACTCTATATTTTATTTTCGGTGCATGAGCCGGAATAGTAGGAACATCTTTAAGAATTTTAGTACGAGCTGAATTAGGACATCCAGGTGCACTTATTGGAGATGACCAAATTTATAACGTAATTGTTACAGCTCATGCATTTGTAATAATTTTTTTTATAGTAATACCAATTATAATTGGAGGATTTGGAAATTGATTAGTTCCATTAATATTAGGAGCCCCTGATATAGCTTTCCCTCGAATAAATAATATAAGTTTTTGACTTTTACCACCTGCATTAACATTATTACTTGTAAGTAGTATAGTGGAAAACGGAGCTGGAACAGGATGAACTGTTTATCCACCTTTATCATCTAATATTGCTCATGGAGGAGCTTCTGTTGATTTAGCTATTTTTTCATTACATTTAGCTGGAATTTCTTCAATTTTAGGAGCTGTAAATTTTATTACAACAGTTATTAATATACGATCTACAGGAATTACTTTTGATCGAATACCTTTATTTGTATGATCAGTAGTTATTACAGCATTATTATTACTTTTATCATTACCAGTATTAGCAGGAGCTATTACTATATTATTAACAGATCGAAATTTAAATACATCATTTTTTGATCCTGCAGGAGGAGGAGATCCAATTCTTTACCAACATTTATTT
>IBIDP124-19|Platycheirus rosarum|COI-5P|MN868830
AACATTATATTTTTTATTTGGAGCTTGAGCTGGTATAGTAGGAACTTCTTTAAGAATTCTTATTCGTGCAGAACTTGGTCATCCAGGAGCATTAATTGGTGATGATCAAATTTATAATGTAATTGTTACTGCTCATGCTTTTGTTATAATTTTTTTTATAGTAATACCAATCATAATTGGAGGATTTGGTAATTGATTAGTACCACTAATACTAGGAGCTCCTGATATAGCATTTCCTCGAATAAATAATATAAGTTTTTGATTATTACCTCCTTCTTTAACACTATTACTAATAAGTAGAATAGTAGAAAATGGAGCTGGAACTGGATGAACAGTATACCCTCCTTTATCTTCAAGAATTGCTCACAGAGGTTCATCAGTTGATTTAGCTATTTTTTCTCTTCATTTAGCTGGAATATCATCAATTTTAGGAGCAGTAAATTTTATTACTACTGTTATTAATATACGATCTAATGGAATTTCATATGACCGAATACCATTATTTGTTTGATCAGTTGTAATTACAGCCTTATTATTACTTTTATCATTACCTGTATTAGCAGGAGCAATTACTATATTATTAACAGACCGAAATTTAAATACATCATTCTTTGATCCTGCTGGAGGAGGAGATCCTATTTTATACCAACATTTATTT
>IBIDP171-19|Rhyncomya felina|COI-5P|MN868726
TACTTTATATTTTATCTTTGGAGCATGATCTGGAATAGTAGGAACATCACTAAGAATTTTAATTCGAACTGAATTAGGTCATCCTGGAGCTTTAATTGGAGATGATCAAATTTATAACGTAATTGTTACAGCTCATGCTTTTGTAATAATTTTTTTTATAGTGATACCAATTATAATTGGAGGATTTGGAAATTGACTAGTCCCCCTAATACTAGGAGCTCCAGATATAGCATTTCCCCGAATGAACAATATAAGTTTTTGATTGCTACCTCCTGCATTAACTTTGTTATTAATAAGCAGTATAGTAGAAAATGGAGCTGGAACAGGATGAACTGTTTACCCTCCTCTATCTTCTAATATCGCTCACGGAGGAGCTTCTGTTGATTTAGCTATTTTTTCATTACATTTAGCAGGAATTTCTTCTATTCTAGGAGCTGTAAATTTTATTACAACTGTAATTAATATACGATCAGTAGGAATTACTTTTGATCGAATACCACTATTTGTATGATCAGTAGTAATTACAGCTTTATTATTATTATTATCTTTACCTGTATTAGCAGGAGCTATTACTATATTATTAACTGATCGAAATTTAAATACTTCATTTTTTGATCCCGCAGGAGGGGGAGATCCTATTTTATACCAACATTTATTT
>IBIDP182-19|Sarcophaga longestylata|COI-5P|MN868843
AACTTTATATTTTATTTTTGGAGCCTGAGCAGGTATGGTAGGAACATCATTAAGAATTCTTATTCGAGCAGAATTAGGGCATCCTGGAGCATTAATCGGTGACGATCAAATTTATAACGTTATTGTAACTGCACACGCCTTTATTATAATTTTTTTTATGGTTATACCAATTATAATTGGAGGATTCGGAAATTGATTAGTGCCTTTAATACTTGGAGCTCCAGATATAGCCTTTCCTCGAATAAATAATATAAGTTTTTGACTCCTTCCTCCTGCACTAACCCTACTCCTAGTAAGTAGTATAGTGGAAAACGGAGCTGGAACTGGATGAACCGTTTATCCTCCATTATCATCTAATATCGCTCACGGGGGAGCTTCTGTTGATCTAGCAATTTTTTCTTTACATTTAGCTGGAATTTCTTCTATTTTAGGAGCAGTAAATTTTATCACTACTGTAATTAATATACGATCAACAGGAATTACTTTTGATCGTATACCTTTATTTGTTTGATCAGTAGTAATTACTGCTTTACTATTATTGCTTTCTTTACCTGTACTAGCGGGAGCTATCACAATATTATTAACGGATCGAAATATTAATACTTCTTTTTTTGATCCTGCCGGAGGAGGGGATCCTATTTTATATCAACACTTATTT
>IBIDP390-19|Fallenia fasciata|COI-5P|MN868810
AACTCTTTATTTTATTTTTGGGGCCTGAGCTGGGATAGTAGGAACAGCCCTTAGTATACTAGTTCGAATAGAATTAGGGCATCCAGGAGCTCTAATTGGAGATGACCAAATCTATAACGTAATCGTTACAGCTCACGCTTTCGTAATAATTTTCTTTATAGTAATACCAATTATAATTGGAGGATTTGGTAATTGACTTGTTCCACTAATATTAGGGGCCCCAGATATAGCATTCCCTCGAATAAATAATATAAGATTTTGAATACTCCCCCCTTCTTTAACTCTACTCTTAGTAAGAAGTATAGTTGAAAGAGGAGCAGGAACAGGATGAACTGTATACCCCCCTTTATCTTCCAACATCGCCCATGGAGGTGCTTCAGTAGATTTAGCTATTTTTTCTCTTCACCTTGCTGGAATTTCATCAATTCTAGGAGCAGTAAACTTCATTACAACCGTAATTAACATACGATCTGTAGGTATTACTTTTGACCGAATACCTTTATTTGTGTGATCAGTTGTAATTACAGCTATTTTACTTTTATTATCCCTACCAGTATTAGCAGGAGCTATTACTATACTTCTAACTGACCGAAACCTTAATACATCATTTTTTGACCCTGCAGGAGGAGGTGACCCAATTTTATATCAACATCTATTC
